# Supplementary material for: Solvent-triggered stereoselectivity of α,α-cyclopropanation of amino acids in the Ni(ii) chiral coordination environment
Source: Royal Society of Chemistry journal article supplement (doi:10.1039/d0dt01578d), 2020-01-01
Supplement: d0dt01578d1.pdf [file d0dt01578d1.pdf]

**Solvent-triggered stereoselectivity of  $\alpha,\alpha$ -cyclopropanation of amino acids  
in the Ni(II) chiral coordination environment**

Oleg A. Levitskiy<sup>1</sup>, Olga I. Aglamazova<sup>1</sup>, Yuri K. Grishin<sup>1</sup>, Ksenia A. Paseshnichenko<sup>1</sup>, Vadim A. Soloshonok,<sup>2,3</sup> Hiroki Moriwaki,<sup>4</sup> and Tatiana V. Magdesieva<sup>1</sup> \*

<sup>1</sup>*Lomonosov Moscow State University, Dept. of Chemistry, Leninskie Gory 1/3, Moscow 119991 Russia*

<sup>2</sup>*Department of Organic Chemistry I, Faculty of Chemistry, University of Basque Country UPV/EHU, Paseo Manuel Lardizabal 3, 20018 San Sebastian, Spain.*

<sup>3</sup>*IKERBASQUE, Basque Foundation for Science, Alameda Urquijo 36-5, Plaza, Bizkaia, 48011 Bilbao, Spain.*

<sup>4</sup>*Hamari Chemical Ltd., 1-4-29 Kunijima, Higashi-Yodogawa-ku, Osaka 533-0024, Japan.*

## Contents

|                                                                                                                                                                                                                                                                                                    |    |
|----------------------------------------------------------------------------------------------------------------------------------------------------------------------------------------------------------------------------------------------------------------------------------------------------|----|
| 1. Atom numeration and signal assignment in the NMR spectra of complexes <b>I</b> .....                                                                                                                                                                                                            | 4  |
| 2. <sup>1</sup> H NMR spectrum of the Ni complex of Shiff base of (1 <i>R</i> ,2 <i>S</i> )-1-amino-2-(methoxycarbonyl)cyclopropanecarboxylic acid and ( <i>S</i> )-BPB ((1 <i>R</i> ,2 <i>S</i> )- <b>I</b> ).....                                                                                | 6  |
| 3. <sup>13</sup> C NMR spectrum of the Ni complex of Shiff base of (1 <i>R</i> ,2 <i>S</i> )-1-amino-2-(methoxycarbonyl)cyclopropanecarboxylic acid and ( <i>S</i> )-BPB ((1 <i>R</i> ,2 <i>S</i> )- <b>I</b> ).....                                                                               | 7  |
| 4. HSQC spectrum of the Ni complex of Shiff base of (1 <i>R</i> ,2 <i>S</i> )-1-amino-2-(methoxycarbonyl)cyclopropanecarboxylic acid and ( <i>S</i> )-BPB ((1 <i>R</i> ,2 <i>S</i> )- <b>I</b> ).....                                                                                              | 8  |
| 5. HMBC spectrum of the Ni complex of Shiff base of (1 <i>R</i> ,2 <i>S</i> )-1-amino-2-(methoxycarbonyl)cyclopropanecarboxylic acid and ( <i>S</i> )-BPB ((1 <i>R</i> ,2 <i>S</i> )- <b>I</b> ).....                                                                                              | 9  |
| 6. NOESY-1D spectrum (saturation of proton H <sub>28</sub> ) (upper) and <sup>1</sup> H NMR spectrum (bottom) of the Ni complex of Shiff base of (1 <i>R</i> ,2 <i>S</i> )-1-amino-2-(methoxycarbonyl)cyclopropanecarboxylic acid and ( <i>S</i> )-BPB ((1 <i>R</i> ,2 <i>S</i> )- <b>I</b> )..... | 10 |
| 7. <sup>1</sup> H NMR spectrum of the Ni complex of Shiff base of (1 <i>S</i> ,2 <i>R</i> )-1-amino-2-(methoxycarbonyl)cyclopropanecarboxylic acid and ( <i>S</i> )-BPB ((1 <i>S</i> ,2 <i>R</i> )- <b>I</b> ).....                                                                                | 11 |
| 8. <sup>13</sup> C NMR spectrum of the Ni complex of Shiff base of (1 <i>S</i> ,2 <i>R</i> )-1-amino-2-(methoxycarbonyl)cyclopropanecarboxylic acid and ( <i>S</i> )-BPB ((1 <i>S</i> ,2 <i>R</i> )- <b>I</b> ).....                                                                               | 12 |
| 9. HSQC spectrum of the Ni complex of Shiff base of (1 <i>S</i> ,2 <i>R</i> )-1-amino-2-(methoxycarbonyl)cyclopropanecarboxylic acid and ( <i>S</i> )-BPB ((1 <i>S</i> ,2 <i>R</i> )- <b>I</b> ).....                                                                                              | 13 |
| 10. HMBC spectrum of the Ni complex of Shiff base of (1 <i>S</i> ,2 <i>R</i> )-1-amino-2-(methoxycarbonyl)cyclopropanecarboxylic acid and ( <i>S</i> )-BPB ((1 <i>S</i> ,2 <i>R</i> )- <b>I</b> ).....                                                                                             | 14 |
| 11. <sup>1</sup> H NMR spectrum of the Ni complex of Shiff base of (1 <i>S</i> ,2 <i>S</i> )-1-amino-2-(methoxycarbonyl)cyclopropanecarboxylic acid and ( <i>S</i> )-BPB ((1 <i>S</i> ,2 <i>S</i> )- <b>I</b> ).....                                                                               | 15 |
| 12. <sup>13</sup> C NMR spectrum of the Ni complex of Shiff base of (1 <i>S</i> ,2 <i>S</i> )-1-amino-2-(methoxycarbonyl)cyclopropanecarboxylic acid and ( <i>S</i> )-BPB ((1 <i>S</i> ,2 <i>S</i> )- <b>I</b> ).....                                                                              | 16 |
| 13. HSQC spectrum of the Ni complex of Shiff base of (1 <i>S</i> ,2 <i>S</i> )-1-amino-2-(methoxycarbonyl)cyclopropanecarboxylic acid and ( <i>S</i> )-BPB ((1 <i>S</i> ,2 <i>S</i> )- <b>I</b> ).....                                                                                             | 17 |
| 14. HMBC spectrum of the Ni complex of Shiff base of (1 <i>S</i> ,2 <i>S</i> )-1-amino-2-(methoxycarbonyl)cyclopropanecarboxylic acid and ( <i>S</i> )-BPB ((1 <i>S</i> ,2 <i>S</i> )- <b>I</b> ).....                                                                                             | 18 |
| 15. Atom numeration and signal assignment in the NMR spectra of complexes <b>II</b> .....                                                                                                                                                                                                          | 19 |
| 16. <sup>1</sup> H NMR spectrum of the Ni complex of Shiff base of (1 <i>R</i> ,2 <i>S</i> )-1-amino-2-(methoxycarbonyl)cyclopropanecarboxylic acid and ( <i>S</i> )-CBPB ((1 <i>R</i> ,2 <i>S</i> )- <b>II</b> ).....                                                                             | 20 |
| 17. <sup>13</sup> C NMR spectrum of the Ni complex of Shiff base of (1 <i>R</i> ,2 <i>S</i> )-1-amino-2-(methoxycarbonyl)cyclopropanecarboxylic acid and ( <i>S</i> )-CBPB ((1 <i>R</i> ,2 <i>S</i> )- <b>II</b> ).....                                                                            | 21 |
| 18. HSQC spectrum of the Ni complex of Shiff base of (1 <i>R</i> ,2 <i>S</i> )-1-amino-2-(methoxycarbonyl)cyclopropanecarboxylic acid and ( <i>S</i> )-CBPB ((1 <i>R</i> ,2 <i>S</i> )- <b>II</b> ).....                                                                                           | 22 |
| 19. HMBC spectrum of the Ni complex of Shiff base of (1 <i>R</i> ,2 <i>S</i> )-1-amino-2-(methoxycarbonyl)cyclopropanecarboxylic acid and ( <i>S</i> )-CBPB ((1 <i>R</i> ,2 <i>S</i> )- <b>II</b> ).....                                                                                           | 23 |

|                                                                                                                                                                                                                                                                                                       |    |
|-------------------------------------------------------------------------------------------------------------------------------------------------------------------------------------------------------------------------------------------------------------------------------------------------------|----|
| 20. NOESY-1D spectra (saturation of proton H <sub>29</sub> ) (upper) and <sup>1</sup> H NMR spectrum (bottom) of the Ni complex of Schiff base of (1 <i>R</i> ,2 <i>S</i> )-1-amino-2-(methoxycarbonyl)cyclopropanecarboxylic acid and ( <i>S</i> )-CBPB ((1 <i>R</i> ,2 <i>S</i> )- <b>II</b> )..... | 24 |
| 21. NOESY-1D spectra (saturation of proton <i>o</i> -Bn) (upper) and <sup>1</sup> H NMR spectrum (bottom) of the Ni complex of Schiff base of (1 <i>R</i> ,2 <i>S</i> )-1-amino-2-(methoxycarbonyl)cyclopropanecarboxylic acid and ( <i>S</i> )-CBPB ((1 <i>R</i> ,2 <i>S</i> )- <b>II</b> ).....     | 25 |
| 22. <sup>1</sup> H NMR spectrum of the Ni complex of Schiff base of (1 <i>S</i> ,2 <i>R</i> )-1-amino-2-(methoxycarbonyl)cyclopropanecarboxylic acid and ( <i>S</i> )-CBPB ((1 <i>S</i> ,2 <i>R</i> )- <b>II</b> ).....                                                                               | 26 |
| 23. <sup>13</sup> C NMR spectrum of the Ni complex of Schiff base of (1 <i>S</i> ,2 <i>R</i> )-1-amino-2-(methoxycarbonyl)cyclopropanecarboxylic acid and ( <i>S</i> )-CBPB ((1 <i>S</i> ,2 <i>R</i> )- <b>II</b> ).....                                                                              | 27 |
| 24. HSQC spectrum of the Ni complex of Schiff base of (1 <i>S</i> ,2 <i>R</i> )-1-amino-2-(methoxycarbonyl)cyclopropanecarboxylic acid and ( <i>S</i> )-CBPB ((1 <i>S</i> ,2 <i>R</i> )- <b>II</b> ).....                                                                                             | 28 |
| 25. HMBC spectrum of the Ni complex of Schiff base of (1 <i>S</i> ,2 <i>R</i> )-1-amino-2-(methoxycarbonyl)cyclopropanecarboxylic acid and ( <i>S</i> )-CBPB ((1 <i>S</i> ,2 <i>R</i> )- <b>II</b> ).....                                                                                             | 29 |
| 26. NOESY-2D spectrum of the Ni complex of Schiff base of (1 <i>S</i> ,2 <i>R</i> )-1-amino-2-(methoxycarbonyl)cyclopropanecarboxylic acid and ( <i>S</i> )-CBPB ((1 <i>S</i> ,2 <i>R</i> )- <b>II</b> ).....                                                                                         | 30 |
| 27. ESI-HRMS data for the Ni complex of Schiff base of (1 <i>R</i> ,2 <i>S</i> )-1-amino-2-(methoxycarbonyl)cyclopropanecarboxylic acid and ( <i>S</i> )-BPB ((1 <i>R</i> ,2 <i>S</i> )- <b>I</b> ).....                                                                                              | 31 |
| 28. ESI-HRMS data for the Ni complex of Schiff base of (1 <i>S</i> ,2 <i>R</i> )-1-amino-2-(methoxycarbonyl)cyclopropanecarboxylic acid and ( <i>S</i> )-BPB ((1 <i>S</i> ,2 <i>R</i> )- <b>I</b> ).....                                                                                              | 32 |
| 29. ESI-HRMS data for the Ni complex of Schiff base of (1 <i>S</i> ,2 <i>S</i> )-1-amino-2-(methoxycarbonyl)cyclopropanecarboxylic acid and ( <i>S</i> )-BPB ((1 <i>S</i> ,2 <i>S</i> )- <b>I</b> ).....                                                                                              | 33 |
| 30. ESI-HRMS data for the Ni complex of Schiff base of (1 <i>R</i> ,2 <i>S</i> )-1-amino-2-(methoxycarbonyl)cyclopropanecarboxylic acid and ( <i>S</i> )-CBPB ((1 <i>R</i> ,2 <i>S</i> )- <b>II</b> ).....                                                                                            | 34 |
| 31. ESI-HRMS data for the Ni complex of Schiff base of (1 <i>S</i> ,2 <i>R</i> )-1-amino-2-(methoxycarbonyl)cyclopropanecarboxylic acid and ( <i>S</i> )-CBPB ((1 <i>S</i> ,2 <i>R</i> )- <b>II</b> ).....                                                                                            | 35 |

## 1. Atom numeration and signal assignment in the NMR spectra of complexes I

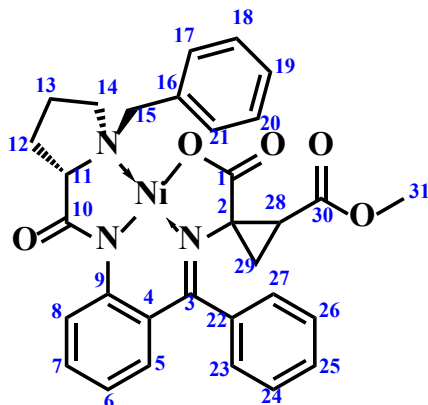

### (*R,S*)-I

NMR  $^1\text{H}$  ( $\text{CDCl}_3$   $\delta$ , ppm): 8.64 (dd,  $^3J = 8.7$  Hz,  $^4J = 1.1$  Hz, 1H (H-8)), 8.07-8.04 (m, 2H (H-17,21)), 7.61-7.56 (m, 2H (H-18,20)), 7.54-7.49 (m, 2H (H-19,25)), 7.49-7.43 (m, 2H (H-24,26)), 7.33-7.22 (m, 3H (H-7,23,27)), 7.01 (dd,  $^3J = 8.3$  Hz,  $^4J = 1.7$  Hz, 1H (H-5)), 6.75 (ddd,  $^3J = 8.3$  Hz,  $^3J = 7.0$  Hz,  $^4J = 1.1$  Hz, 1H (H-6)), 4.35 (d,  $^2J = 13.1$  Hz, 1H (H-15)), 4.32-4.25 (m, 1H (H-14)), 3.82 (dd,  $^3J = 8.8$  Hz,  $^3J = 2.6$  Hz, 1H (H-11)), 3.68 (s, 3H (H-31)), 3.12 (d,  $^2J = 13.1$  Hz, 1H (H-15)), 2.99-2.91 (m, 1H (H-14)), 2.59 (dd,  $^3J = 9.0$  Hz,  $^3J = 6.3$  Hz, 1H (H-28)), 2.24-2.15 (m, 1H (H-13)), 2.14-1.86 (m, 3H (H-12,12,13)), 1.69 (dd,  $^3J = 9.0$  Hz,  $^2J = 7.1$  Hz, 1H (H-29)), 0.78-0.73 (m, 1H (H-29)).

NMR  $^{13}\text{C}$ - $\{^1\text{H}\}$  ( $\text{CDCl}_3$   $\delta$ , ppm): 180.65 (C-10), 174.31 (C-1), 172.28 (C-3), 168.62 (C-30), 143.93 (C-9), 135.69 (C-22), 134.70 (C-5), 133.51 (C-16), 133.34 (C-7), 131.35 (C-17,21), 130.76 (C-23), 130.14 (C-19), 129.37 (C-18,20), 129.22 (C-27), 129.15 (C-25), 128.40 (C-24), 128.25 (C-26), 126.51 (C-4), 122.51 (C-8), 120.69 (C-6), 68.15 (C-11), 59.40 (C-2), 59.33 (C-15), 58.28 (C-14), 52.45 (C-31), 34.12 (C-28), 28.97 (C-13), 22.59 (C-12), 22.39 (C-29).

### (*S,R*)-I:

NMR  $^1\text{H}$  ( $\text{CDCl}_3$   $\delta$ , ppm): 8.14 (d,  $^3J = 8.6$  Hz, 1H (H-8)), 8.05 (d,  $^3J = 7.3$  Hz, 2H (H-17,21)), 7.53-7.47 (m, 1H (H-25)), 7.46-7.40 (m, 2H (H-24,26)), 7.28-7.20 (m, 3H (H-18,20,23)), 7.18-7.13 (m, 1H (H-27)), 7.10-7.04 (m, 2H (H-7,19)), 6.79 (dd,  $^3J = 8.2$  Hz,  $^4J = 1.4$  Hz, 1H (H-5)), 6.70-6.64 (m, 1H (H-6)), 4.24 (d,  $^2J = 12.7$  Hz, 1H (H-15)), 4.09-3.93 (m, 1H (H-13)), 3.73 (s, 3H (H-31)), 3.42-3.32 (m, 3H (H-11,14,15)), 2.77-2.68 (m, 1H (H-12)), 2.67-2.59 (m, 1H (H-12)), 2.56 (dd,  $^3J = 8.8$  Hz,  $^3J = 6.4$  Hz, 1H (H-28)), 2.05-1.96 (m, 1H (H-14)), 1.64 (dd,  $^2J = 7.3$  Hz,  $^3J = 8.8$  Hz, 1H (H-29)), 0.73 (dd,  $^2J = 7.3$  Hz,  $^3J = 6.4$  Hz, 1H (H-29)).

NMR  $^{13}\text{C}$ - $\{^1\text{H}\}$  ( $\text{CDCl}_3$   $\delta$ , ppm): 179.72 (C-10), 174.14 (C-1), 171.29 (C-3), 168.56 (C-30), 143.30 (C-9), 135.16 (C-22), 134.18 (C-5), 133.40 (C-16), 132.85 (C-7), 131.27 (C-17,21), 130.59 (C-27), 130.26 (C-25), 129.31 (C-23), 128.99 (C-18,20), 128.79 (C-19), 128.30 (C-24,26), 126.93 (C-4), 122.71 (C-8), 120.60 (C-6), 71.20 (C-11), 62.90 (C-15), 59.07 (C-2), 57.09 (C-14), 52.82 (C-31), 34.77 (C-28), 31.05 (C-12), 23.80 (C-13), 22.06 (C-29).

### (*S,S*)-I:

NMR  $^1\text{H}$  ( $\text{CDCl}_3$   $\delta$ , ppm): 8.13 (m, 2H (H-17,21)), 8.00 (d,  $^3J = 8.5$  Hz, 1H (H-8)), 7.53-7.46 (m, 2H (H-25,26)), 7.41-7.37 (m, 1H (H-24)), 7.31-7.27 (m, 2H (H-18,20)), 7.27-7.24 (m, 1H (H-27)), 7.12-7.08 (m, 1H (H-19)), 7.07-7.04 (m, 1H (H-7)), 6.78 (d,  $J = 7.6$  Hz, 1H (H-23)), 6.61-6.59 (m, 2H (H-5, H-6)), 4.30 (d,  $^2J = 12.5$  Hz, 1H (H-15)), 4.01-3.89 (m, 1H (H-12)), 3.75 (s, 3H (H-31)), 3.48-3.43 (m, 2H (H-11,14)), 3.40 (d,  $^2J = 12.5$  Hz, 1H (H-15)), 2.84-2.77 (m, 1H

(H-13)), 2.58-2.47 (m, 1H (H-13)), 2.21-2.14 (m, 2H (H-12,29)), 2.06-1.98 (m, 1H (H-14)), 1.82 (dd,  $^2J = 9.6$  Hz,  $^3J = 7.2$  Hz, 1H (H-28)), 0.32 (dd,  $^2J = 9.6$  Hz,  $^3J = 7.2$  Hz, 1H (H-28)).

NMR  $^{13}\text{C}$  ( $\text{CDCl}_3$ ,  $\delta$ , ppm): 180.29 (C-10), 172.78 (C-1), 168.09 (C-30), 167.93 (C-3), 142.39 (C-9), 134.63 (C-22), 133.79 (C-16), 133.69 (C-5), 132.55 (C-7), 131.35 (C-17,21), 130.27 (C-25), 129.22 (C-24), 129.16 (C-27), 128.95 (C-18, C-20), 128.83 (C-19), 128.67 (C-26), 127.15 (C-4), 126.71 (C-23), 123.30 (C-8), 120.66 (C-6), 70.82 (C-11), 63.27 (C-15), 59.00 (C-2), 57.58 (C-14), 52.55 (C-31), 35.39 (C-29), 30.74 (C-13), 23.33 (C-12), 22.76 (C-28).

2.  $^1\text{H}$  NMR spectrum of the Ni complex of Schiff base of (1*R*,2*S*)-1-amino-2-(methoxycarbonyl)cyclopropanecarboxylic acid and (*S*)-BPB ((1*R*,2*S*)-**I**)

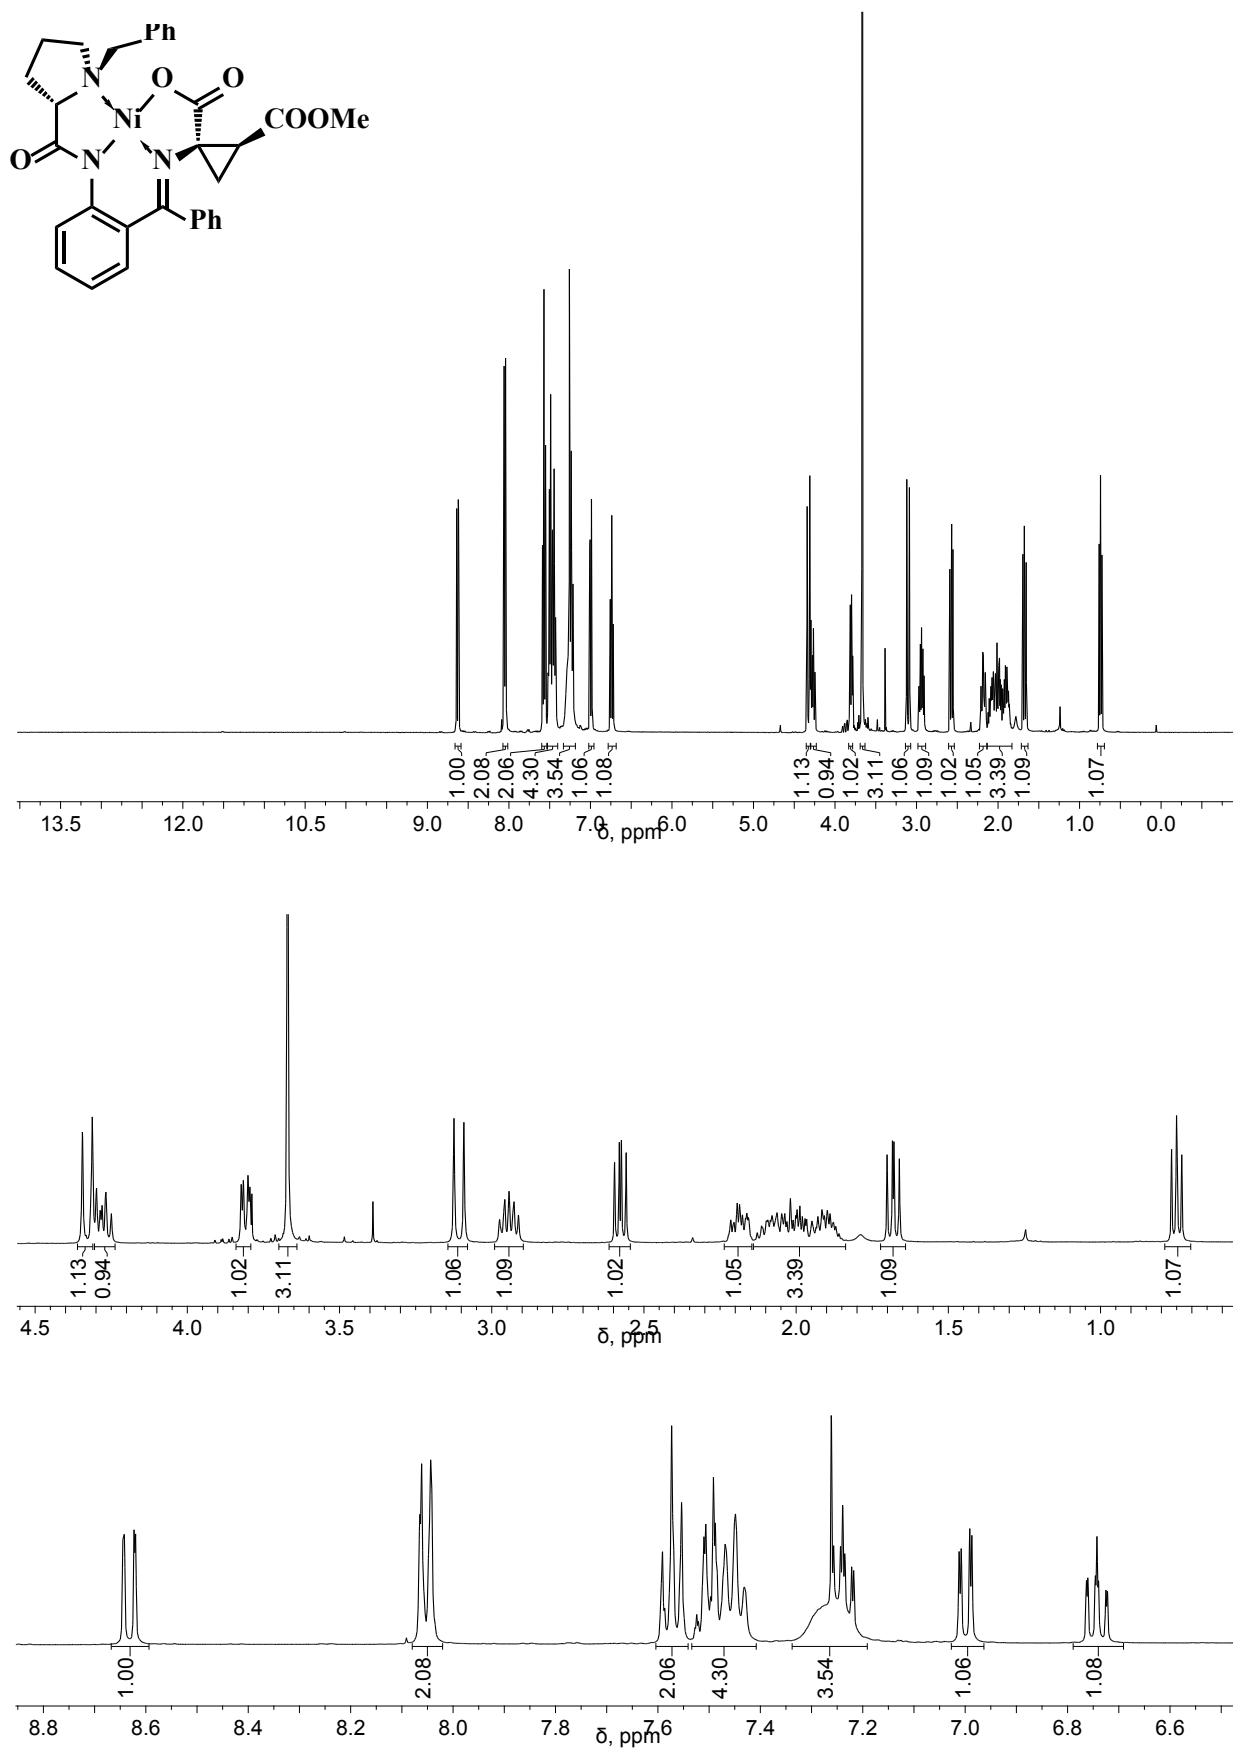

3.  $^{13}\text{C}$  NMR spectrum of the Ni complex of Schiff base of (1*R*,2*S*)-1-amino-2-(methoxycarbonyl)cyclopropanecarboxylic acid and (*S*)-BPB ((1*R*,2*S*)-**I**)

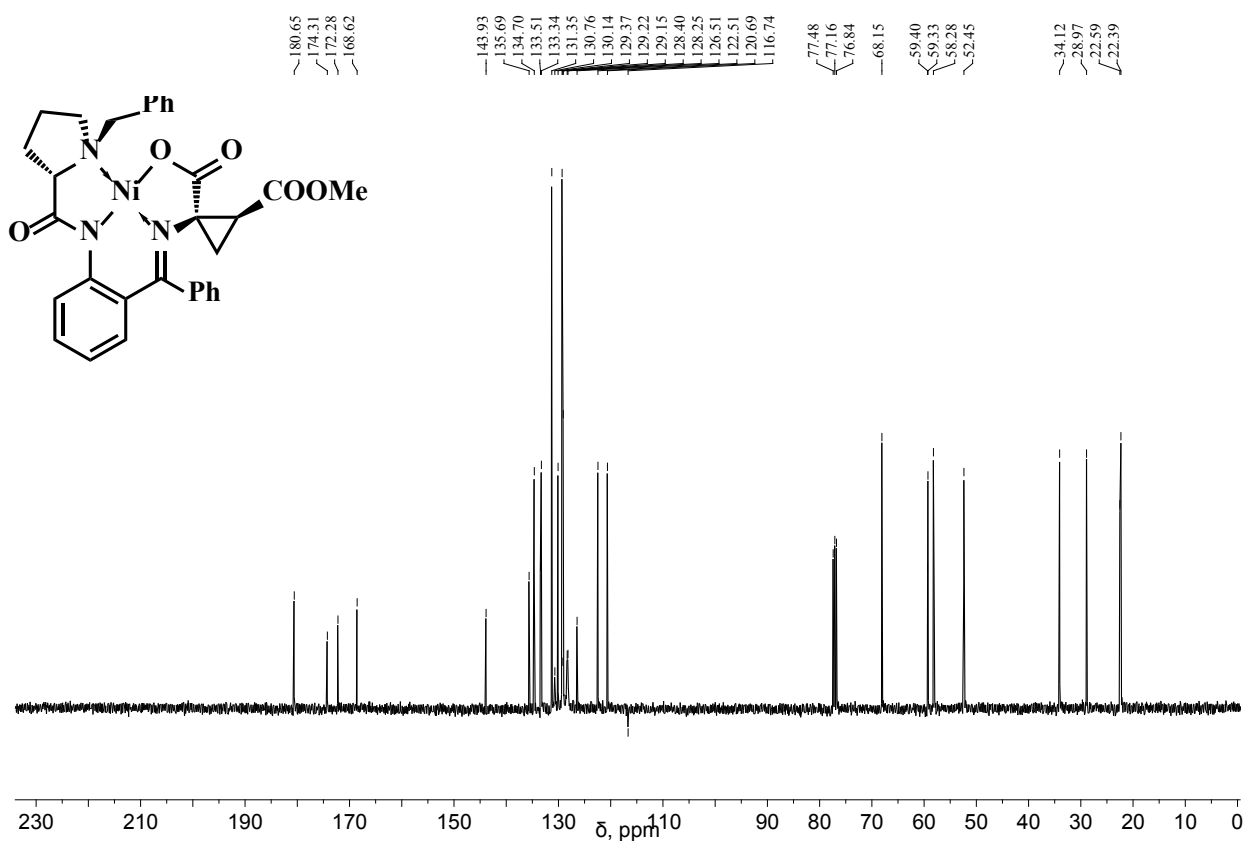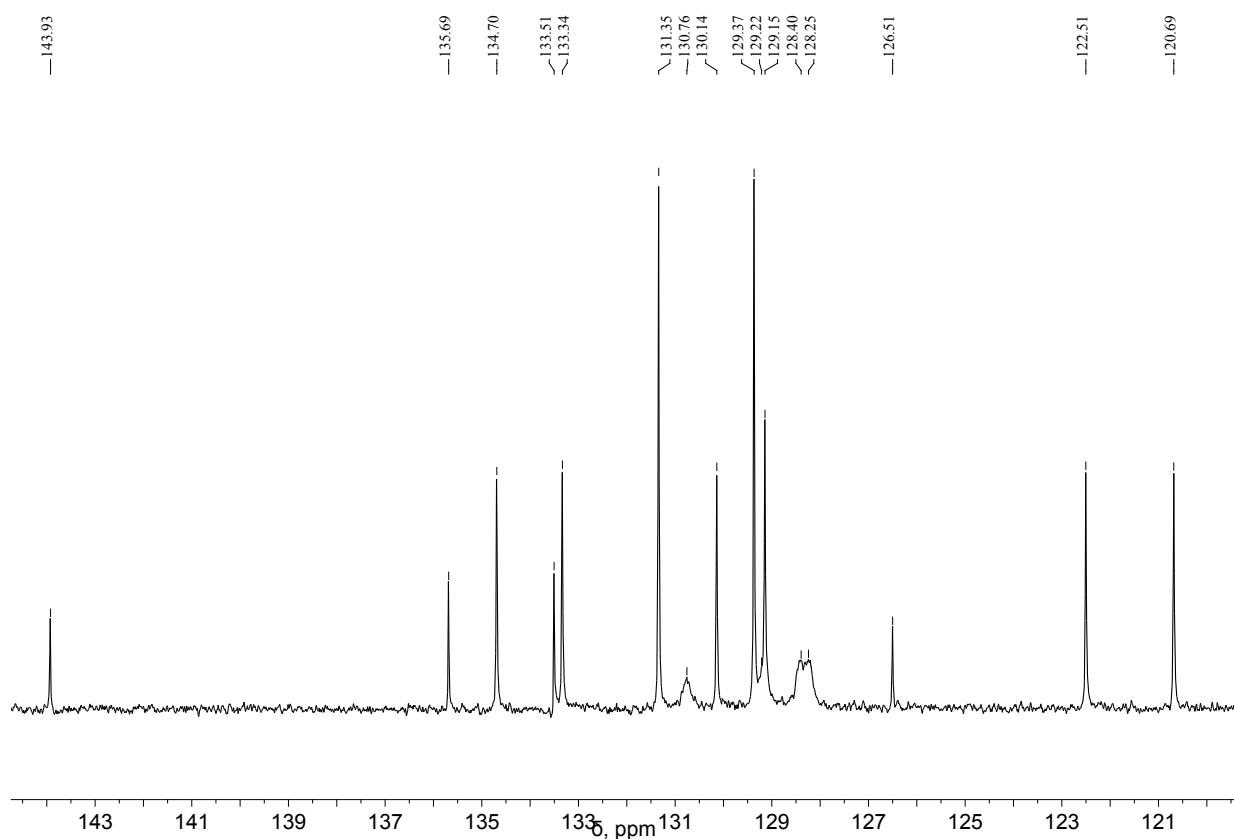

4. HSQC spectrum of the Ni complex of Schiff base of (1*R*,2*S*)-1-amino-2-(methoxycarbonyl)cyclopropanecarboxylic acid and (*S*)-BPB ((1*R*,2*S*)-**I**)

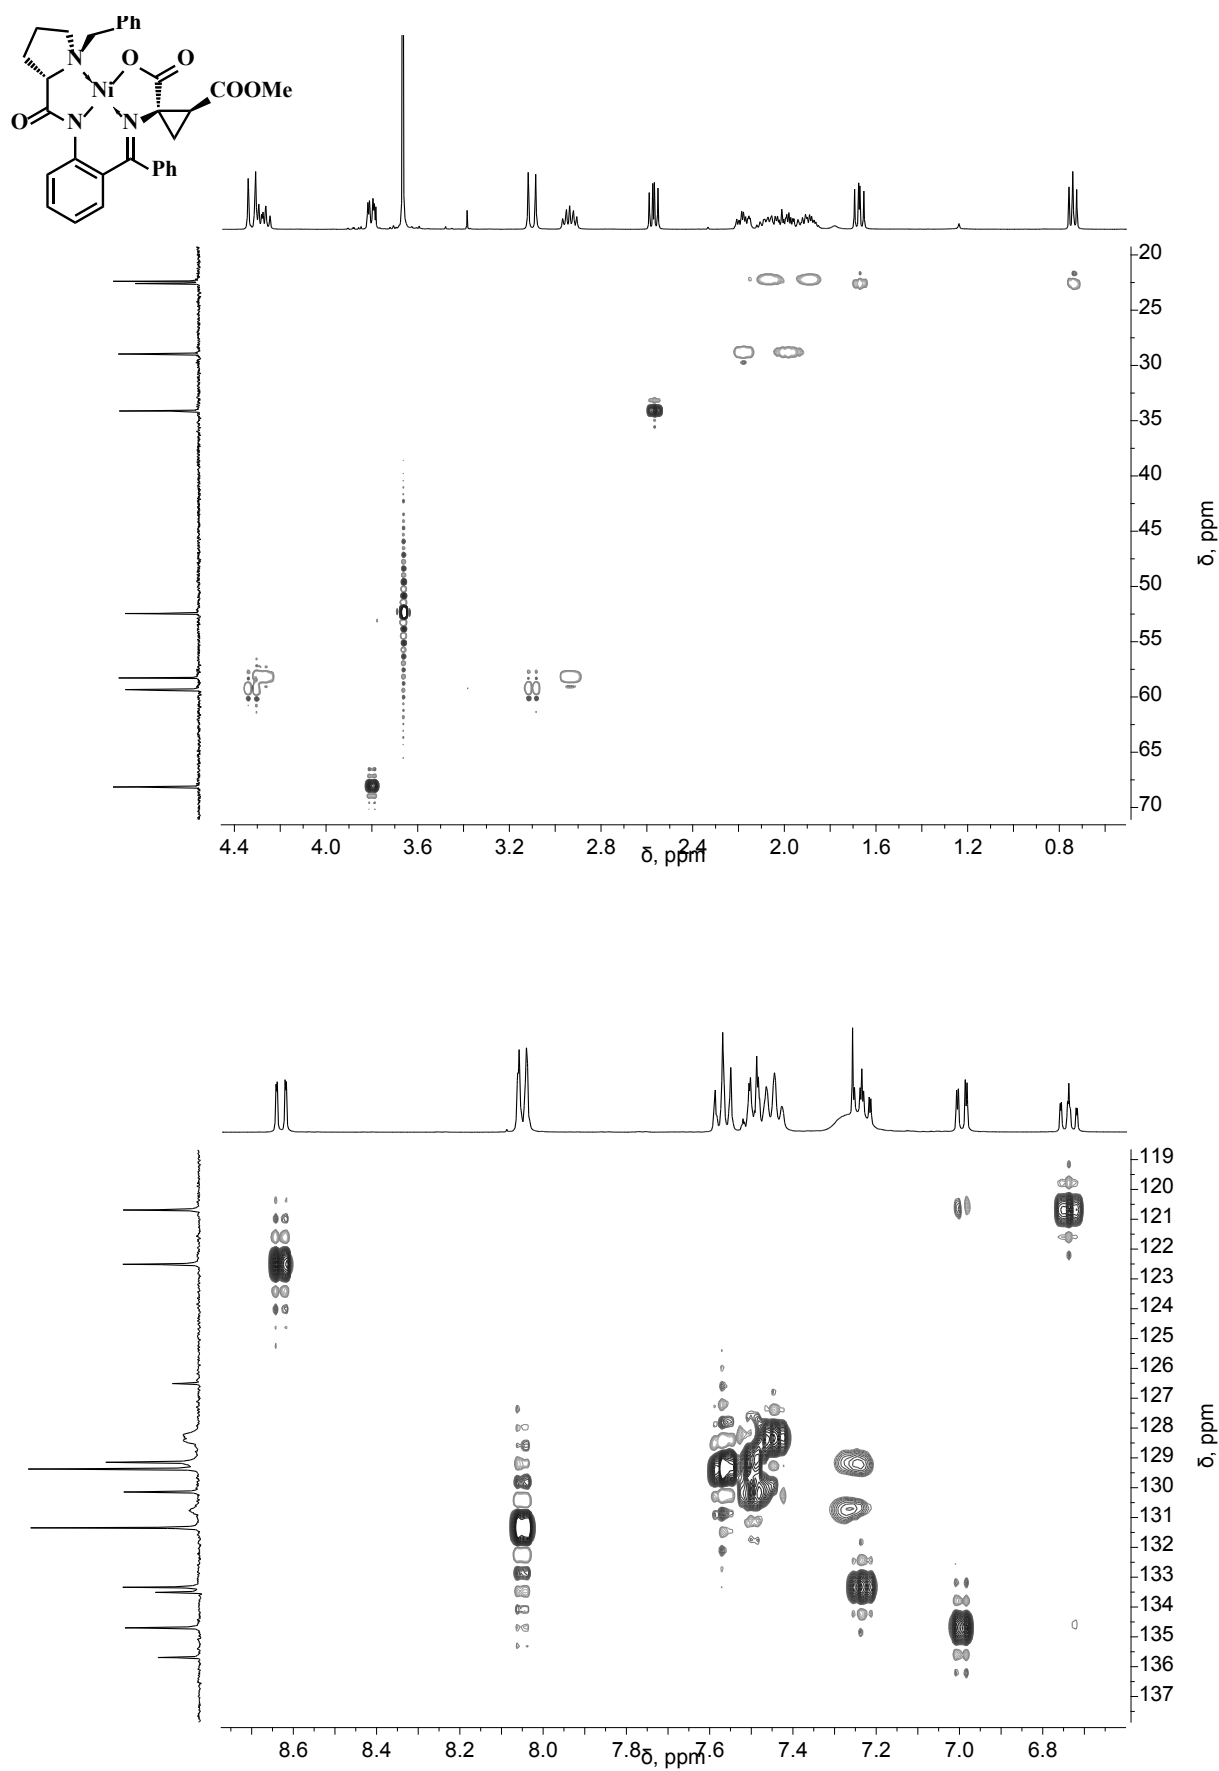



5. HMBC spectrum of the Ni complex of Schiff base of (1*R*,2*S*)-1-amino-2-(methoxycarbonyl)cyclopropanecarboxylic acid and (*S*)-BPB ((1*R*,2*S*)-**I**)

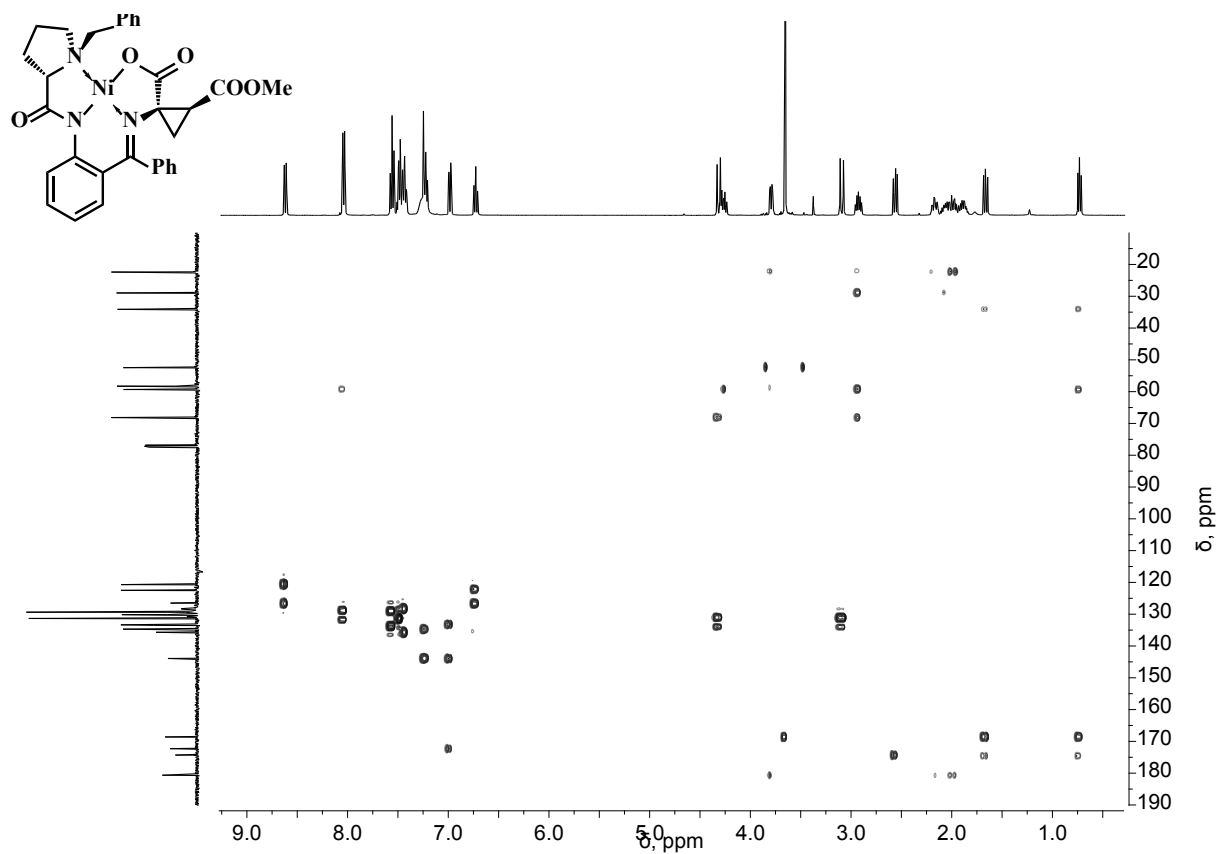

6. NOESY-1D spectrum (saturation of proton H<sub>28</sub>) (upper) and <sup>1</sup>H NMR spectrum (bottom) of the Ni complex of Schiff base of (1*R*,2*S*)-1-amino-2-(methoxycarbonyl)cyclopropanecarboxylic acid and (*S*)-BPB ((1*R*,2*S*)-**I**)

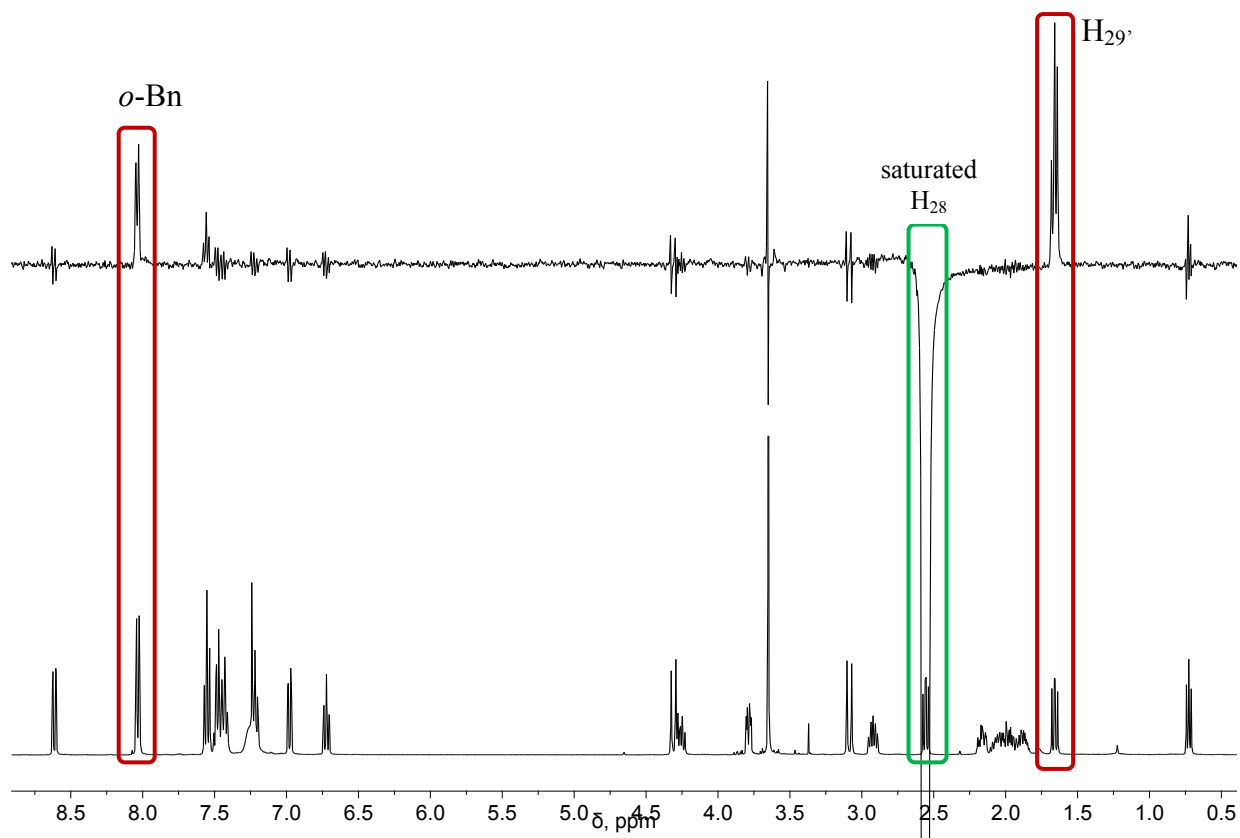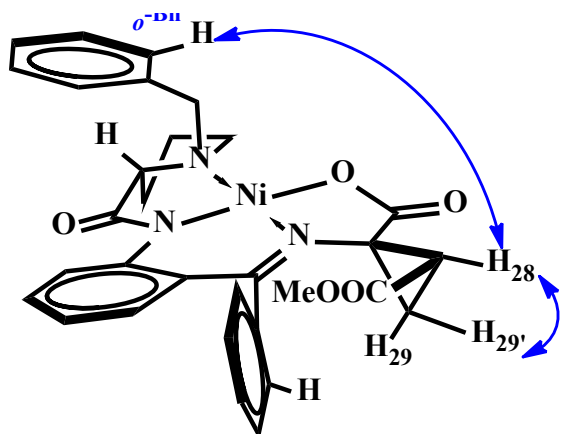

7.  $^1\text{H}$  NMR spectrum of the Ni complex of Schiff base of (1*S*,2*R*)-1-amino-2-(methoxycarbonyl)cyclopropanecarboxylic acid and (*S*)-BPB ((1*S*,2*R*)-**I**)

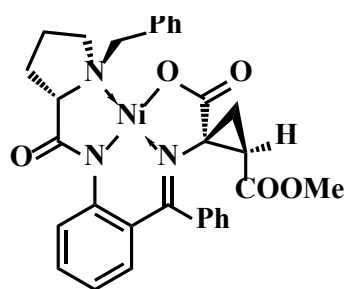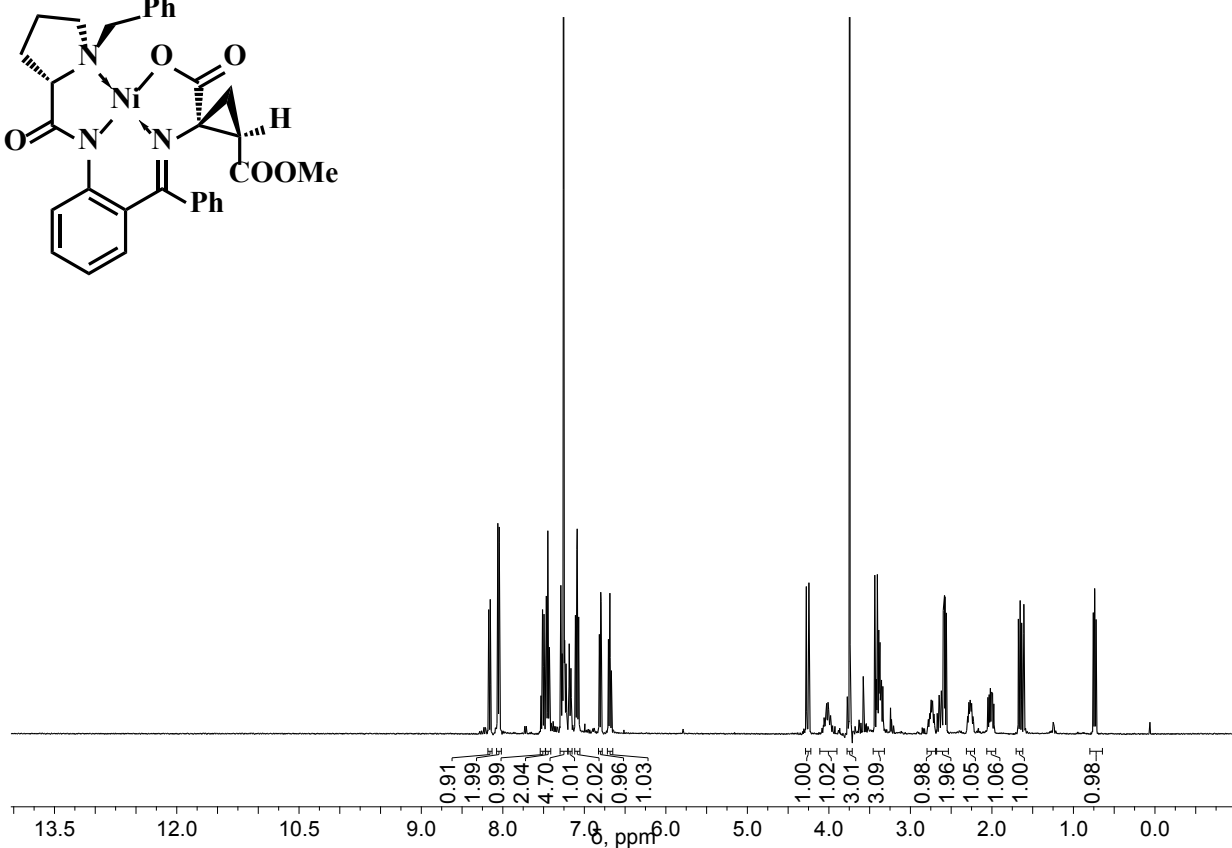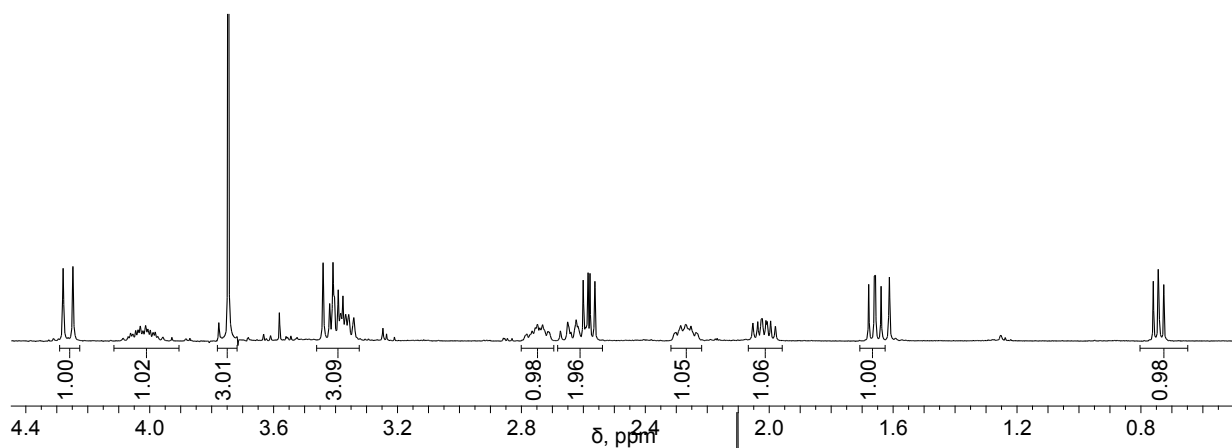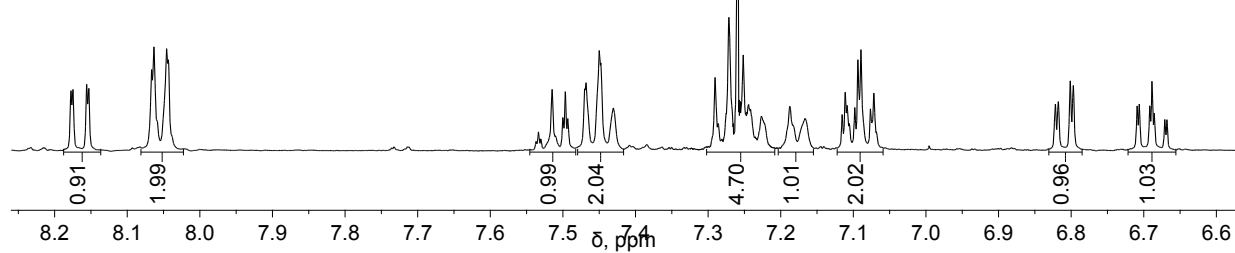

8.  $^{13}\text{C}$  NMR spectrum of the Ni complex of Schiff base of (1*S*,2*R*)-1-amino-2-(methoxycarbonyl)cyclopropanecarboxylic acid and (*S*)-BPB ((1*S*,2*R*)-**I**)

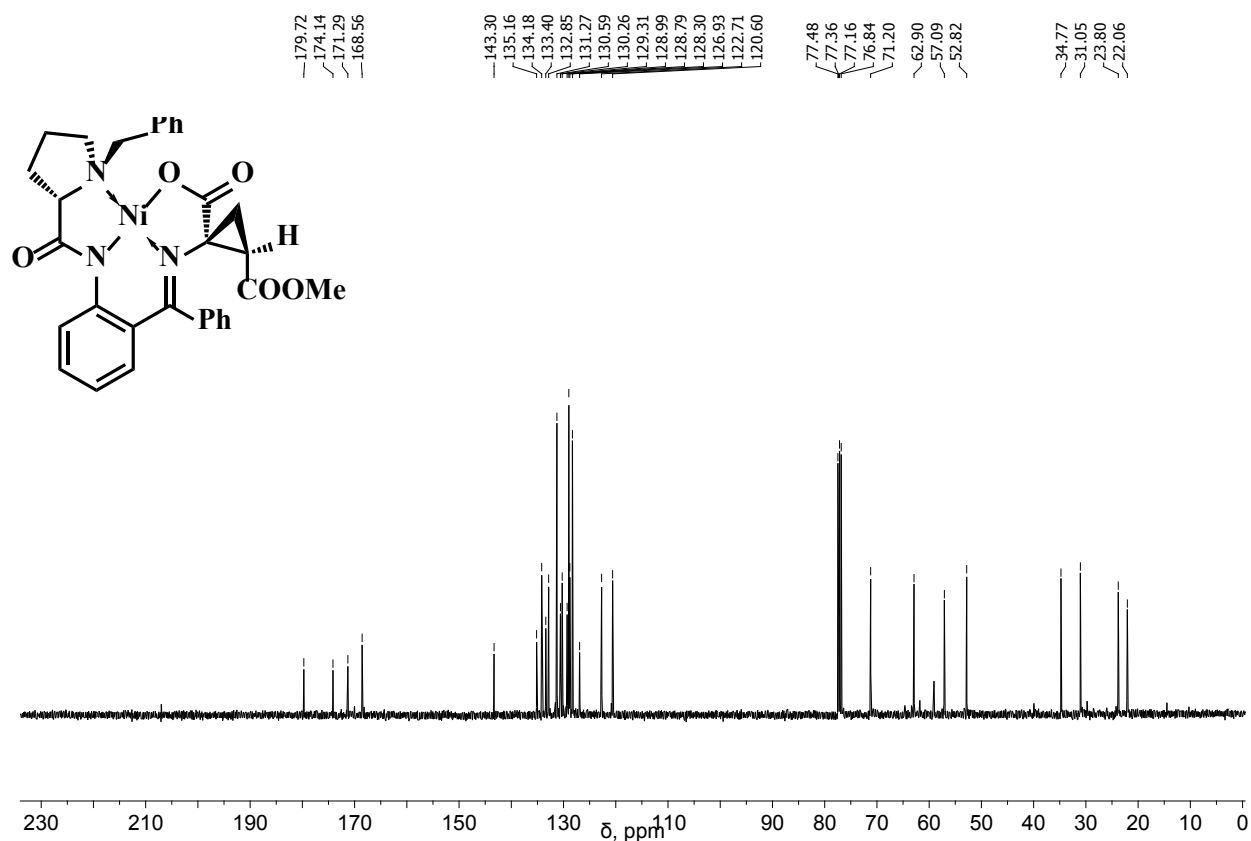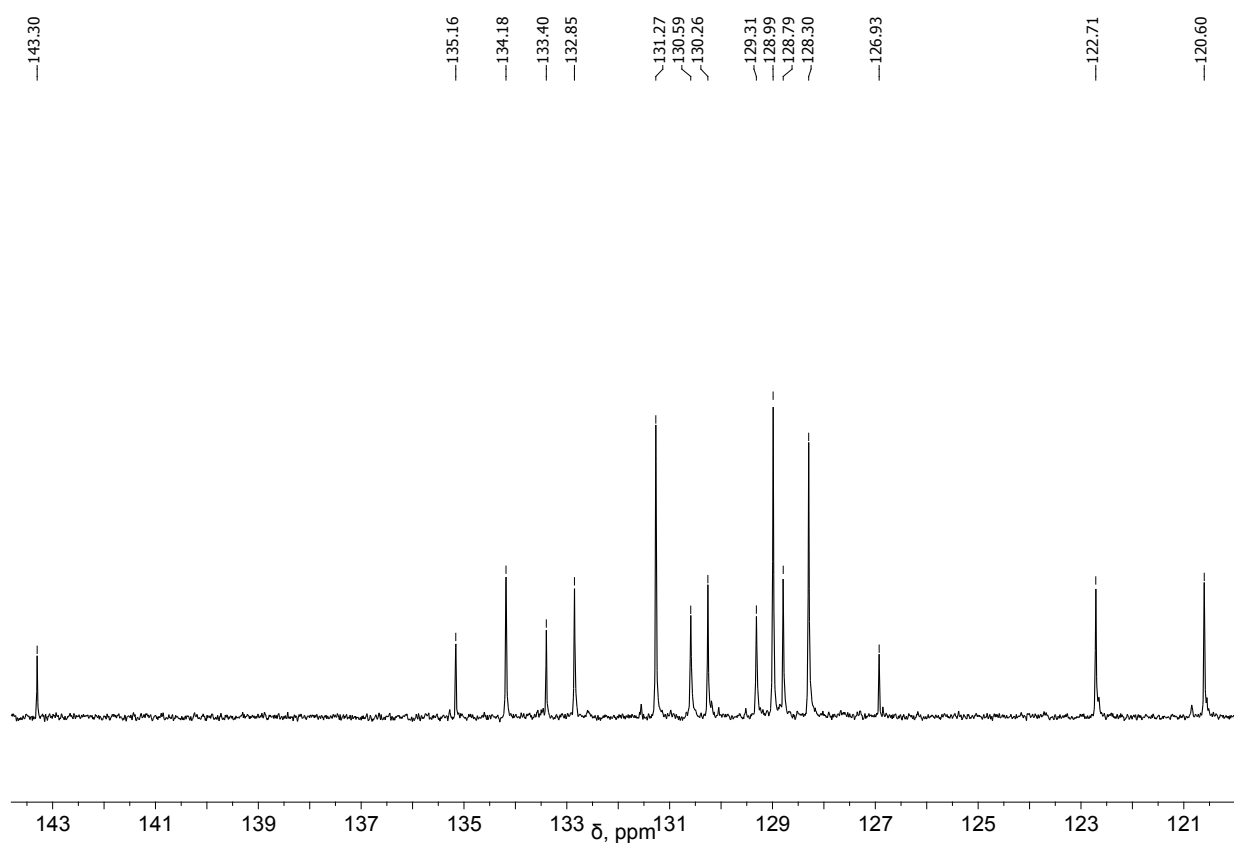

9. HSQC spectrum of the Ni complex of Schiff base of (1*S*,2*R*)-1-amino-2-(methoxycarbonyl)cyclopropanecarboxylic acid and (*S*)-BPB ((1*S*,2*R*)-**I**)

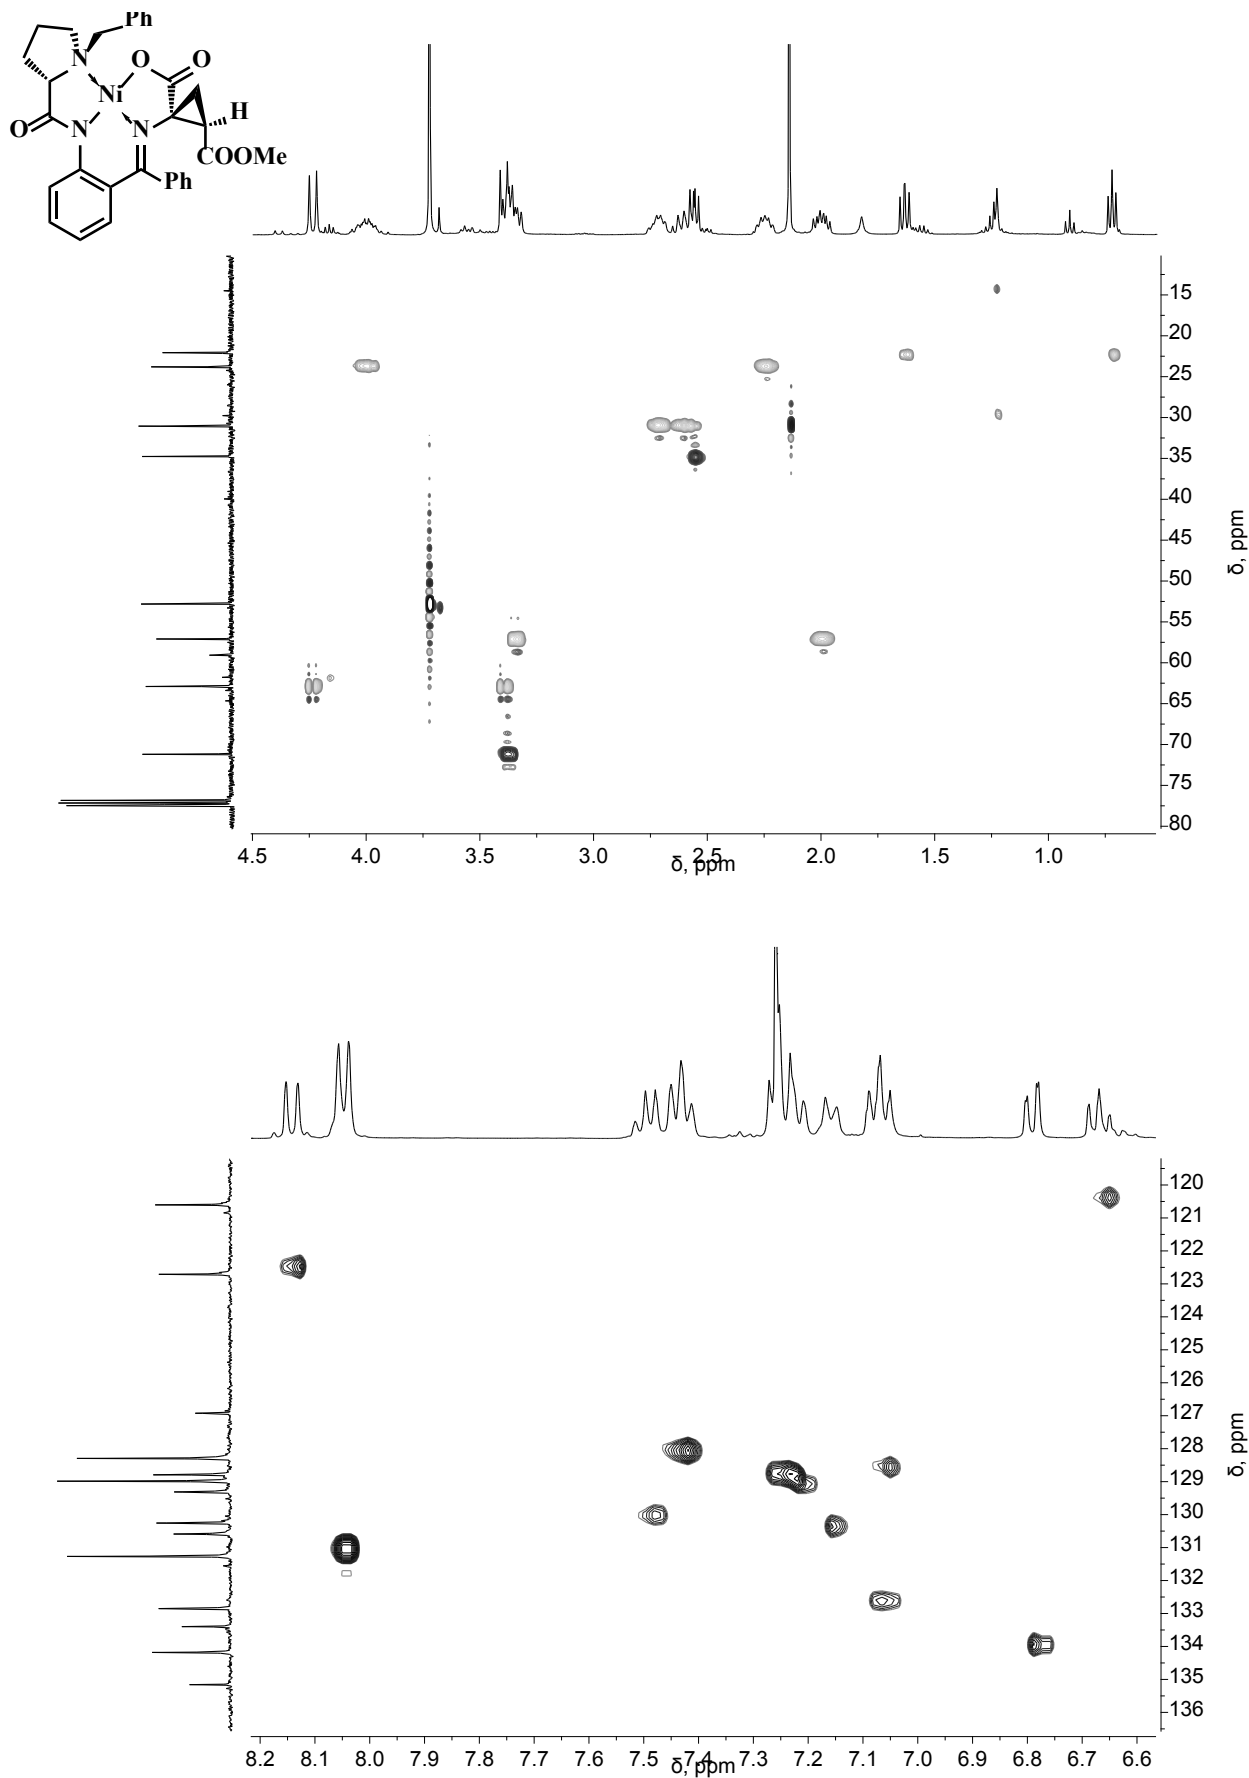

10. HMBC spectrum of the Ni complex of Schiff base of (1*S*,2*R*)-1-amino-2-(methoxycarbonyl)cyclopropanecarboxylic acid and (*S*)-BPB ((1*S*,2*R*)-**I**)

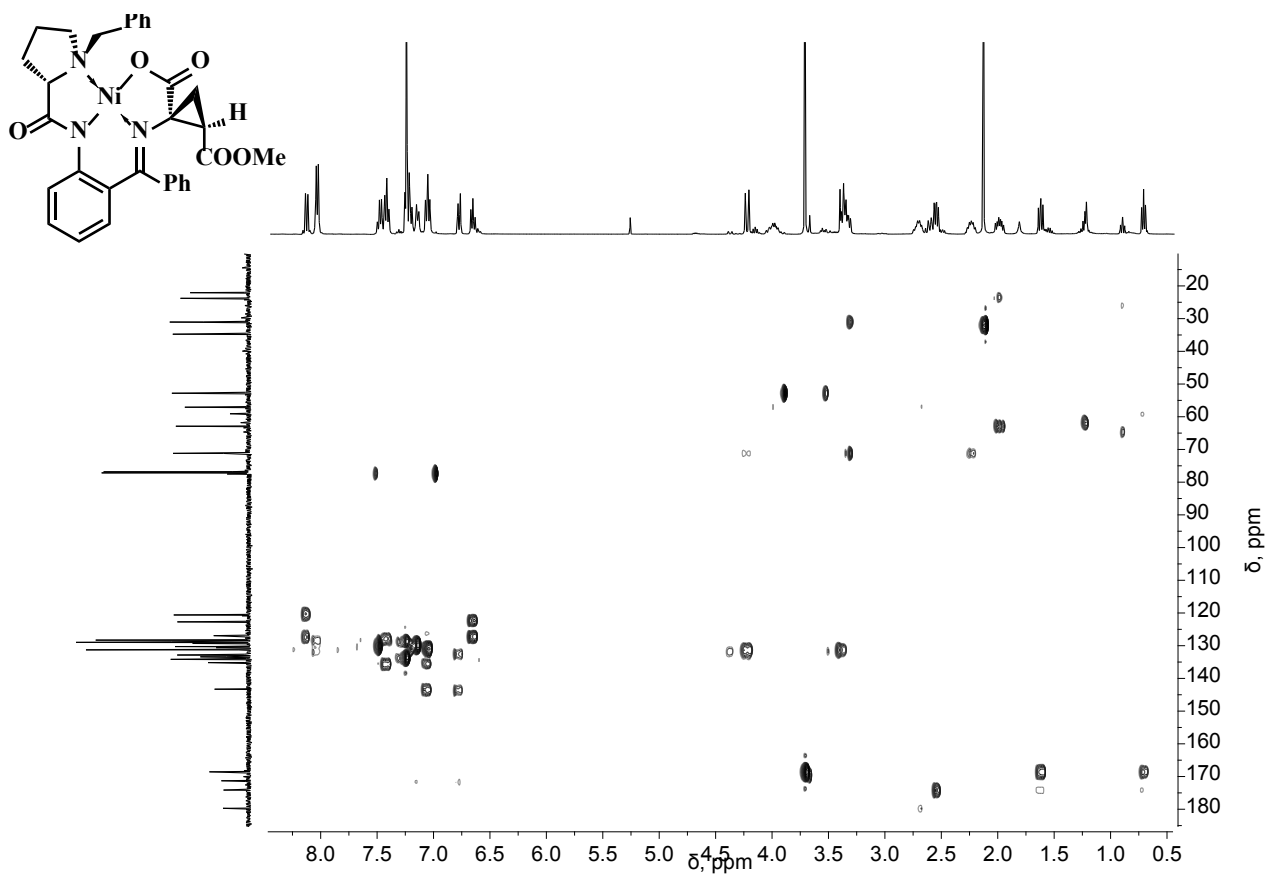

11.  $^1\text{H}$  NMR spectrum of the Ni complex of Schiff base of (1*S*,2*S*)-1-amino-2-(methoxycarbonyl)cyclopropanecarboxylic acid and (*S*)-BPB ((1*S*,2*S*)-**I**)

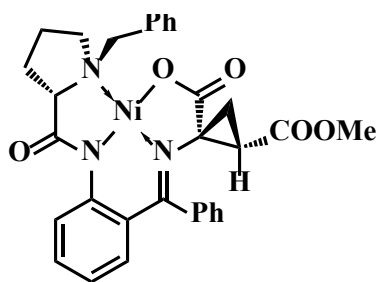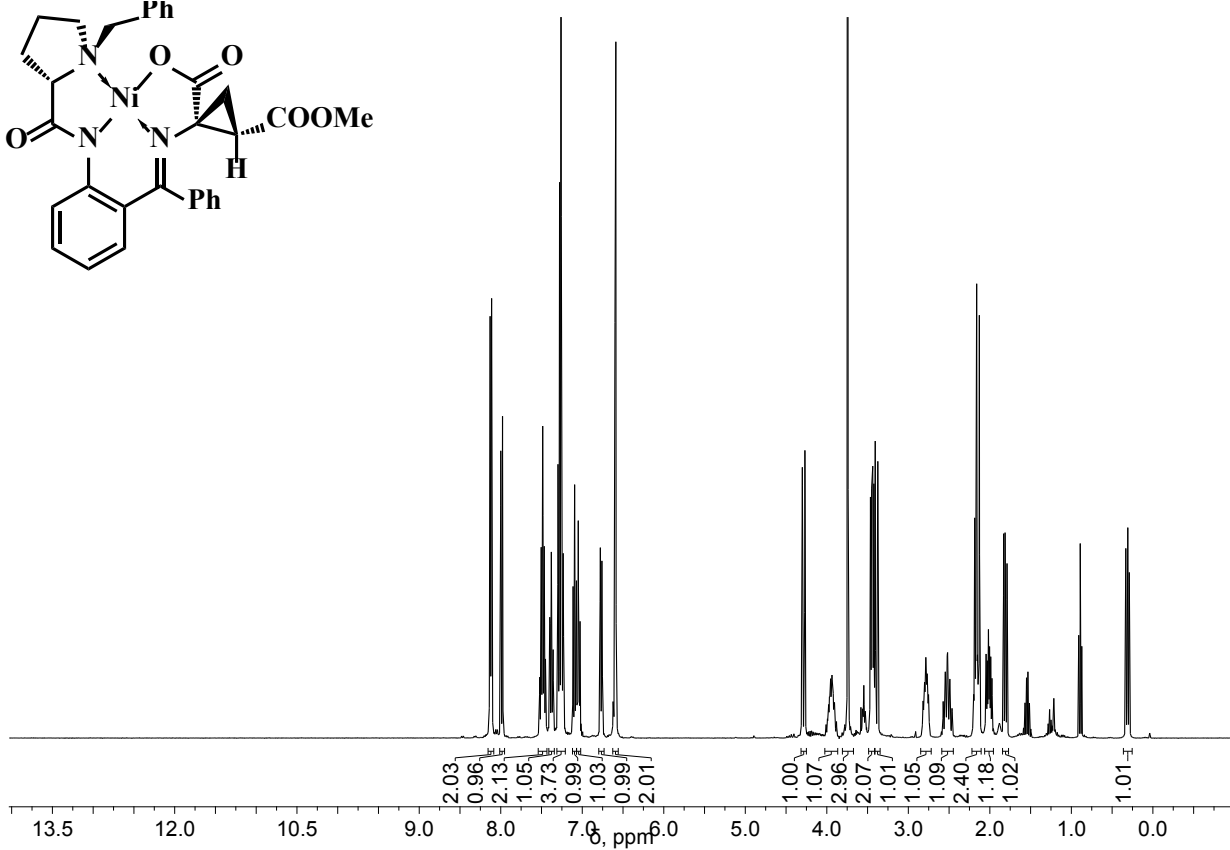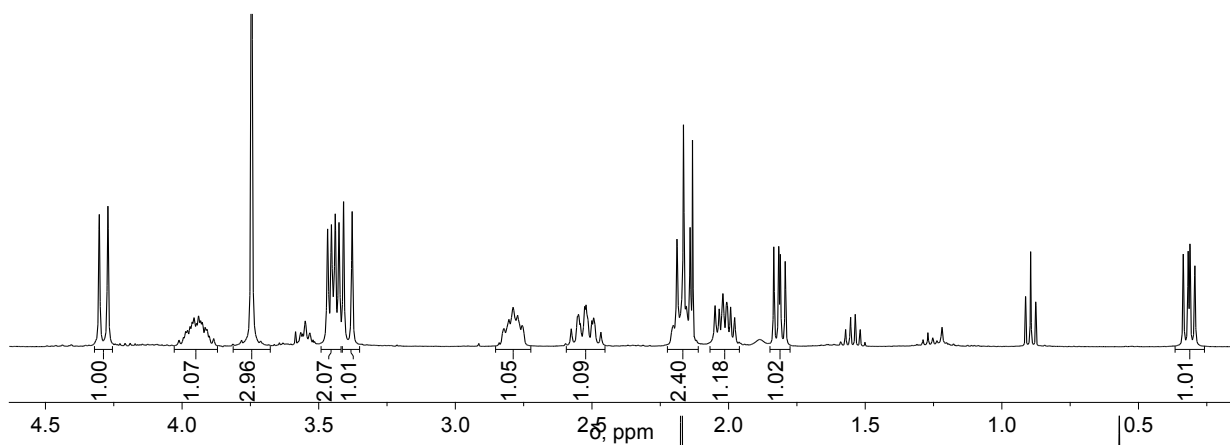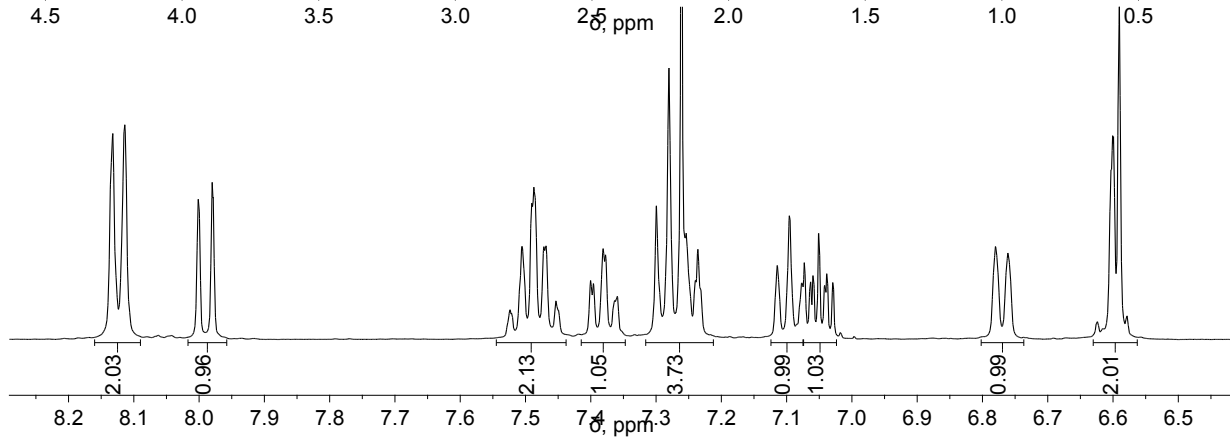

12.  $^{13}\text{C}$  NMR spectrum of the Ni complex of Schiff base of (1*S*,2*S*)-1-amino-2-(methoxycarbonyl)cyclopropanecarboxylic acid and (*S*)-BPB ((1*S*,2*S*)-**I**)

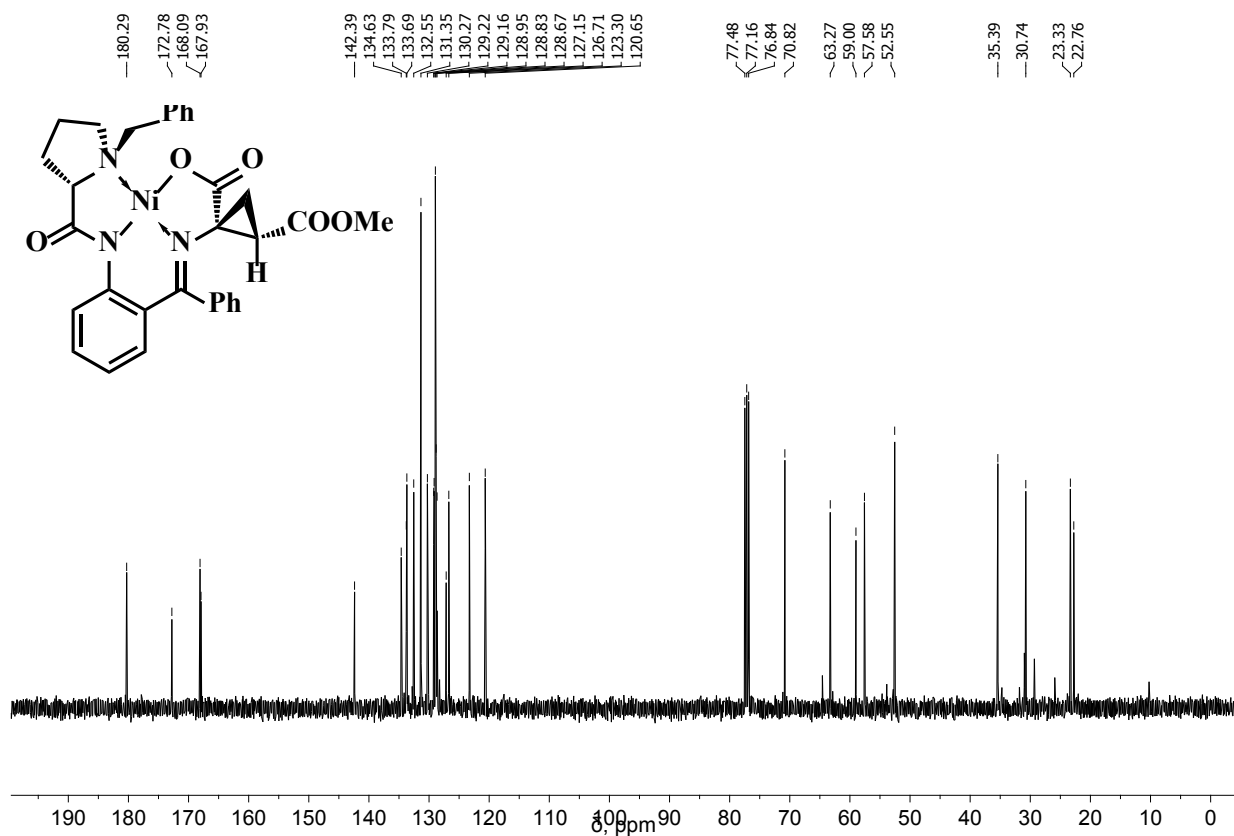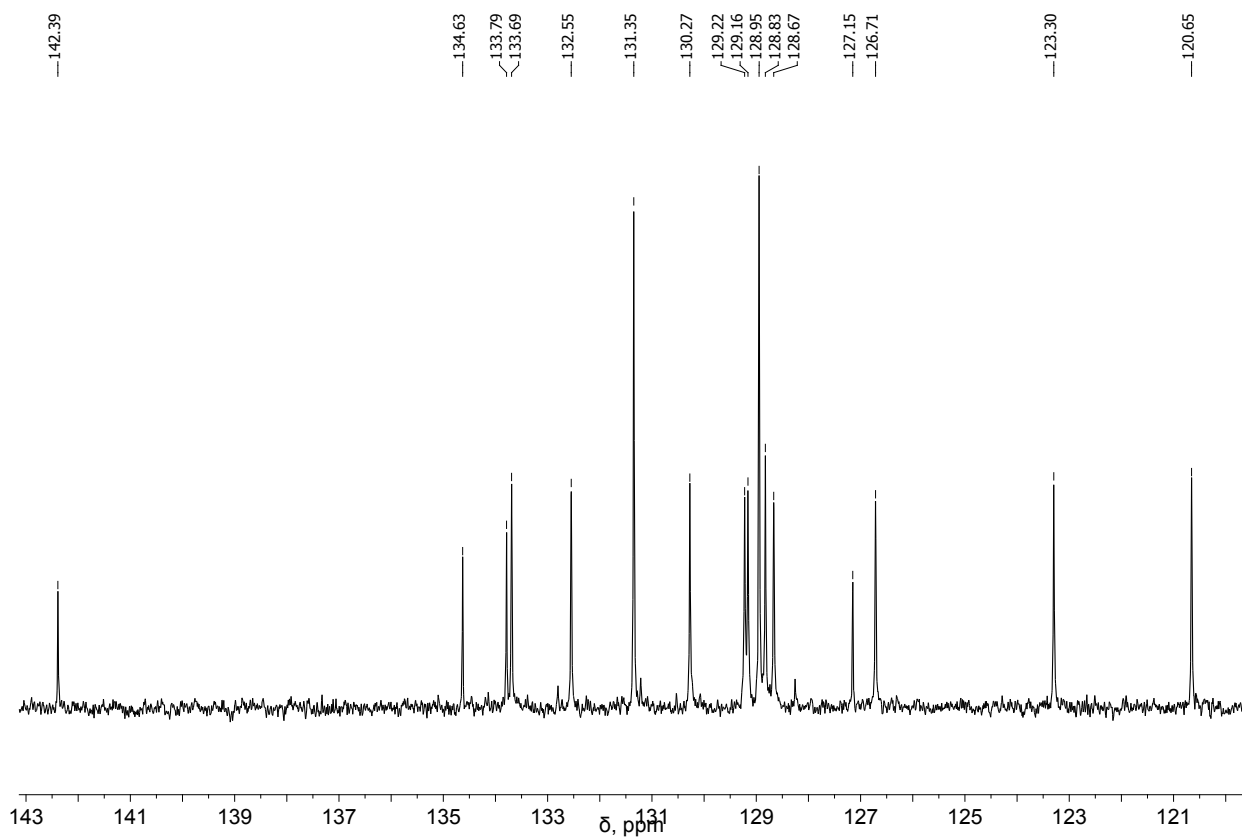



13. HSQC spectrum of the Ni complex of Schiff base of (1*S*,2*S*)-1-amino-2-(methoxycarbonyl)cyclopropanecarboxylic acid and (*S*)-BPB ((1*S*,2*S*)-**I**)

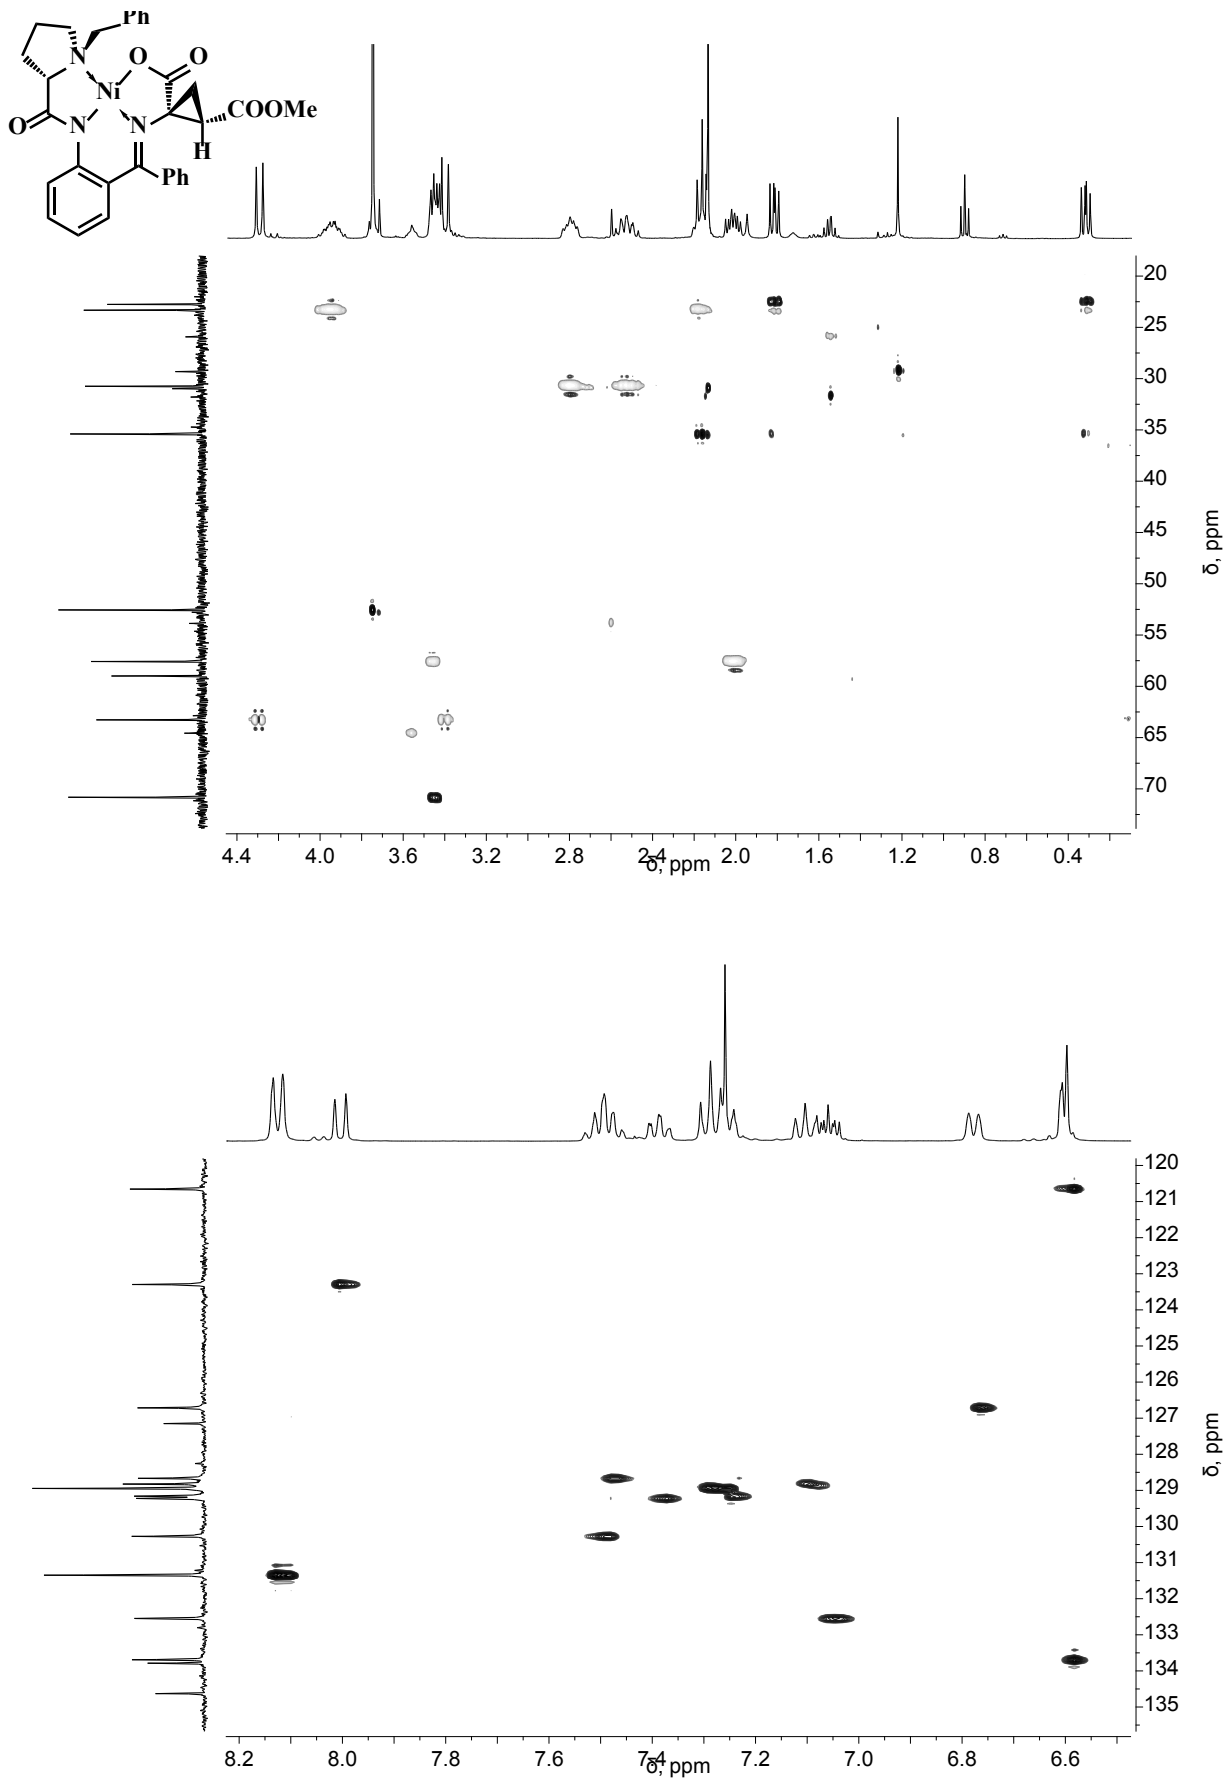

14. HMBC spectrum of the Ni complex of Schiff base of (1*S*,2*S*)-1-amino-2-(methoxycarbonyl)cyclopropanecarboxylic acid and (*S*)-BPB ((1*S*,2*S*)-**I**)

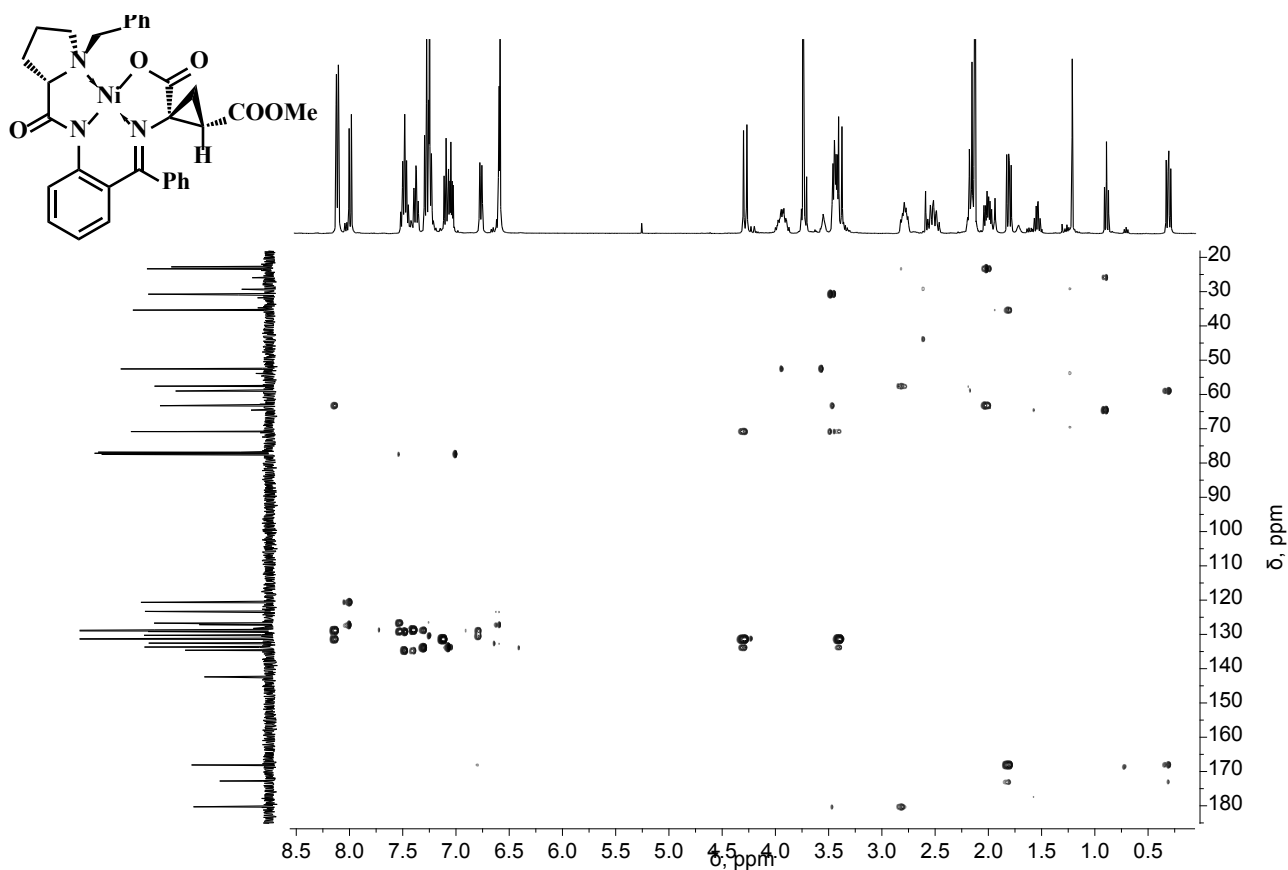

## 15. Atom numeration and signal assignment in the NMR spectra of complexes II

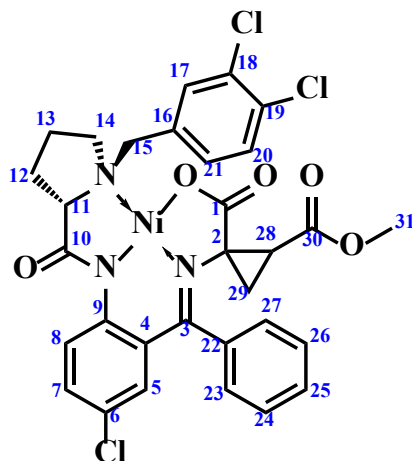

### (1*R*,2*S*)-II:

NMR  $^1\text{H}$  ( $\text{CDCl}_3$   $\delta$ , ppm): 8.66 (d,  $^3J = 9.3$  Hz, 1H (H-8)), 8.22 (dd,  $^3J = 8.3$  Hz,  $^4J = 2.1$  Hz, 1H (H-21)), 7.74 (d,  $^3J = 8.3$  Hz, 1H (H-20)), 7.60 (d,  $^4J = 2.1$  Hz, 1H (H-17)), 7.57-7.52 (m, 1H (H-25)), 7.51-7.44 (m, 1H (H-24,26)), 7.33-7.27 (m, 1H (H-23)), 7.24-7.21 (m, 1H (H-27)), 7.19 (dd,  $^3J = 9.3$  Hz,  $^4J = 2.6$  Hz, 1H (H-7)), 6.96 (d,  $^4J = 2.6$  Hz, 1H (H-5)), 4.36-4.29 (m, 1H (H-14)), 4.08 (d,  $^2J = 13.0$  Hz, 1H (H-15)), 3.81 (dd,  $^3J = 8.4$  Hz,  $^3J = 2.6$  Hz, 1H (H-11)), 3.62 (s, 3H (H-31)), 3.00 (d,  $^3J = 13.0$  Hz, 1H (H-15)), 2.98-2.90 (m, 1H (H-14)), 2.54 (dd,  $^3J = 9.1$  Hz,  $^3J = 6.3$  Hz, 1H (H-28)), 2.30-2.22 (m, 1H (H-13)), 2.15-2.04 (m, 2H (H-12,13)), 2.00-1.91 (m, 1H (H-12)), 1.67 (dd,  $^2J = 7.2$  Hz,  $^3J = 9.1$  Hz, 1H (H-29)), 0.71 (dd,  $^2J = 7.2$  Hz,  $^3J = 6.3$  Hz (H-29)).

NMR  $^{13}\text{C}$ - $\{^1\text{H}\}$  ( $\text{CDCl}_3$   $\delta$ , ppm): 180.20 (C-10), 174.04 (C-1), 171.82 (C-3), 168.41 (C-30), 142.36 (C-9), 135.02 (C-22), 133.97 (C-19), 133.77 (C-16), 133.66 (C-17), 133.50 (C-18), 133.43 (C-5), 133.22 (C-7), 131.56 (C-20), 130.71 (C-25), 130.66 (C-23), 130.59 (C-21), 129.19 (C-27), 128.71 (C-24,26), 127.68 (C-4), 125.67 (C-6), 123.89 (C-8), 68.27 (C-11), 59.53 (C-2), 59.14 (C-14), 58.04 (C-15), 52.62 (C-31), 34.31 (C-28), 28.89 (C-13), 22.69 (C-29), 22.31 (C-12).

### (1*S*,2*R*)-II:

NMR  $^1\text{H}$  ( $\text{CDCl}_3$   $\delta$ , ppm): 8.92 (d,  $^4J = 2.1$  Hz, 1H (H-17)), 8.14 (d,  $^3J = 9.3$  Hz, 1H (H-8)), 7.73 (dd,  $^3J = 8.2$  Hz,  $^4J = 2.1$  Hz, 1H (H-21)), 7.57-7.52 (m, 1H (H-25)), 7.51-7.45 (m, 2H (H-24,26)), 7.29 (d,  $^3J = 8.2$  Hz, 1H (H-20)), 7.26-7.23 (m, 1H (H-23)), 7.16-7.12 (m, 1H (H-27)), 7.08 (dd,  $^3J = 9.3$  Hz,  $^4J = 2.6$  Hz, 1H (H-7)), 6.77 (d,  $^4J = 2.6$  Hz, 1H (H-5)), 4.16 (d,  $^2J = 12.5$  Hz, 1H (H-15)), 4.07-3.93 (m, 1H (H-12)), 3.72 (s, 3H (H-31)), 3.45-3.39 (m, 1H (H-14)), 3.34-3.28 (m, 1H (H-11)), 3.08 (d,  $^2J = 12.5$  Hz, 1H (H-15)), 2.71-2.63 (m, 2H (H-13)), 2.58 (dd,  $^3J = 8.8$  Hz,  $^3J = 6.4$  Hz, 1H (H-28)), 2.36-2.27 (m, 1H (H-12)), 2.09-2.00 (m, 1H (H-14)), 1.64 (dd,  $^2J = 7.3$  Hz,  $^3J = 8.8$  Hz, 1H (H-29)), 0.72 (dd,  $^2J = 7.3$  Hz,  $^3J = 6.4$  Hz, 1H (H-29)).

NMR  $^{13}\text{C}$ - $\{^1\text{H}\}$  ( $\text{CDCl}_3$   $\delta$ , ppm): 179.52 (C-10), 173.85 (C-1), 170.86 (C-3), 168.44 (C-30), 141.52 (C-9), 135.23 (C-18), 134.40 (C-22), 133.72 (C-16), 133.44 (C-17), 133.40 (C-19), 133.15 (C-5), 132.97 (C-7), 131.26 (C-20), 130.80 (C-25), 130.30 (C-23), 129.57 (C-21), 129.41 (C-27), 128.72 (C-24), 128.69 (C-26), 127.95 (C-6), 125.95 (C-4), 123.13 (C-8), 72.38 (C-11), 62.81 (C-15), 59.10 (C-2), 58.48 (C-14), 52.93 (C-31), 35.05 (C-28), 31.36 (C-13), 23.80 (C-12), 22.03 (C-29).

16.  $^1\text{H}$  NMR spectrum of the Ni complex of Schiff base of (1*R*,2*S*)-1-amino-2-(methoxycarbonyl)cyclopropanecarboxylic acid and (*S*)-CBPB ((1*R*,2*S*)-**II**)

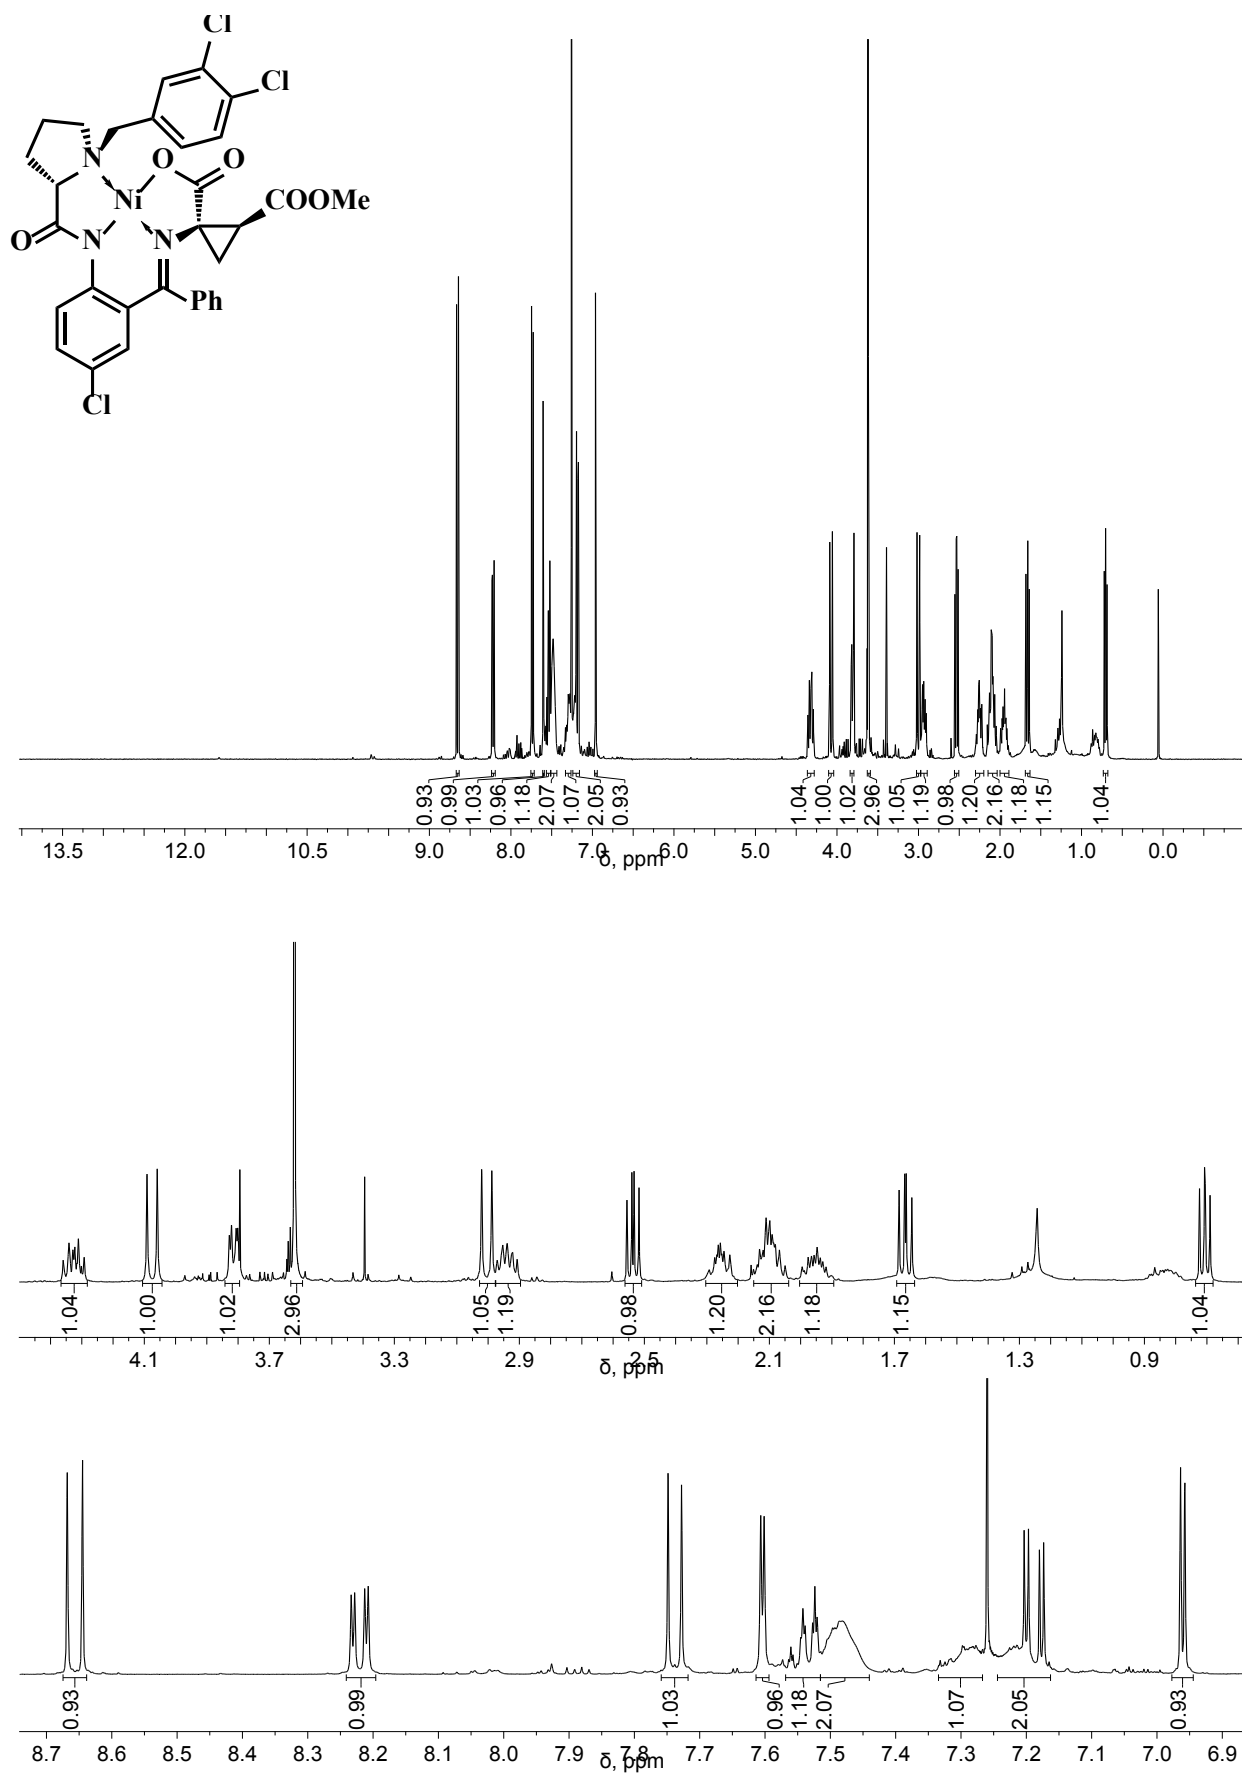

17.  $^{13}\text{C}$  NMR spectrum of the Ni complex of Schiff base of (1*R*,2*S*)-1-amino-2-(methoxycarbonyl)cyclopropanecarboxylic acid and (*S*)-CBPB ((1*R*,2*S*)-**II**)

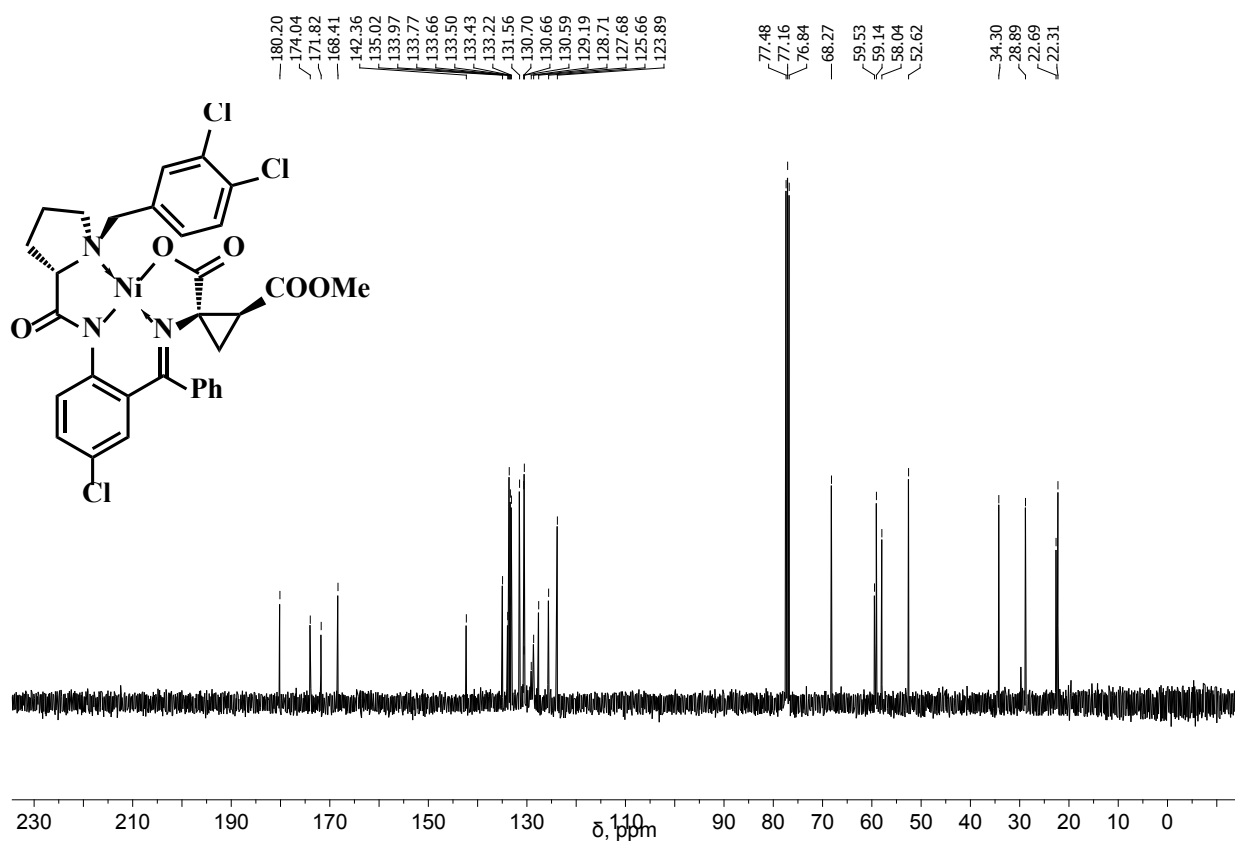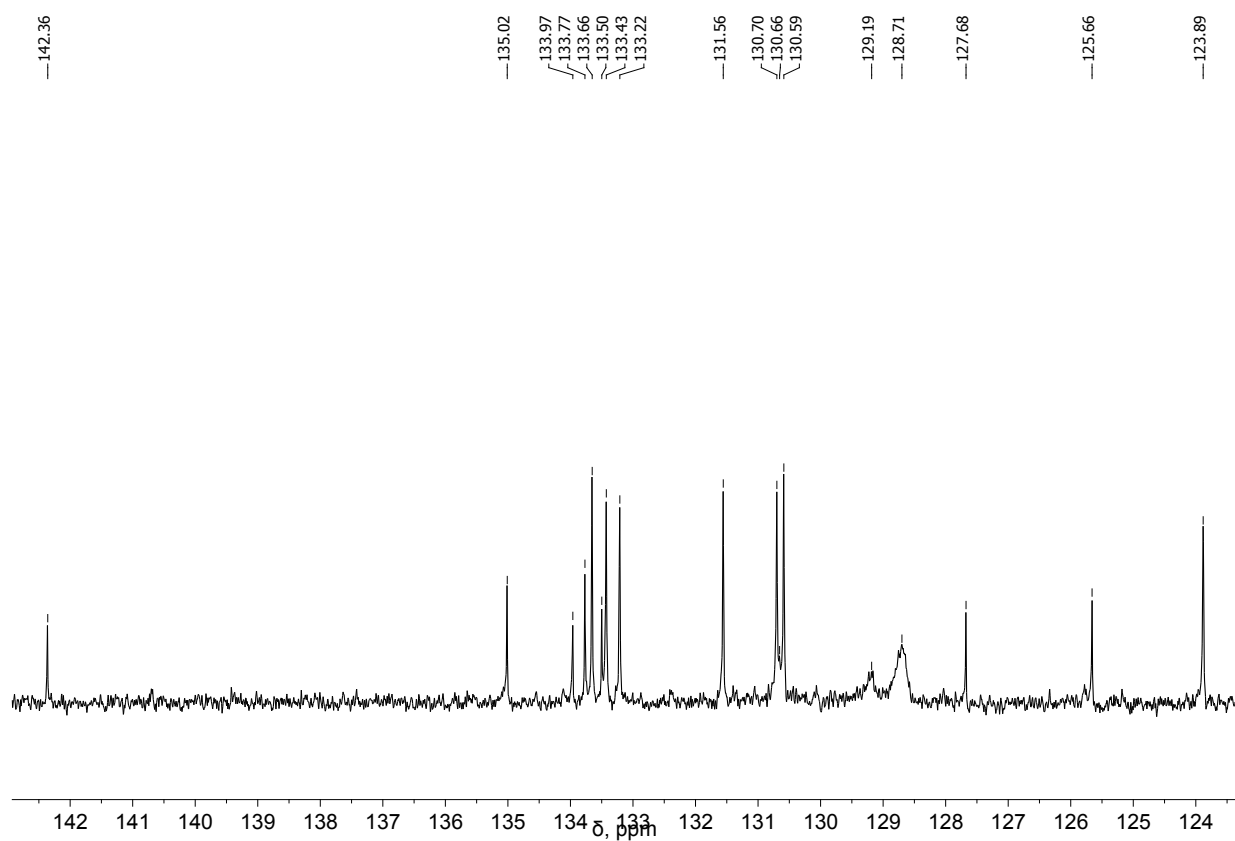

18. HSQC spectrum of the Ni complex of Schiff base of (1*R*,2*S*)-1-amino-2-(methoxycarbonyl)cyclopropanecarboxylic acid and (*S*)-CBPB ((1*R*,2*S*)-**II**)

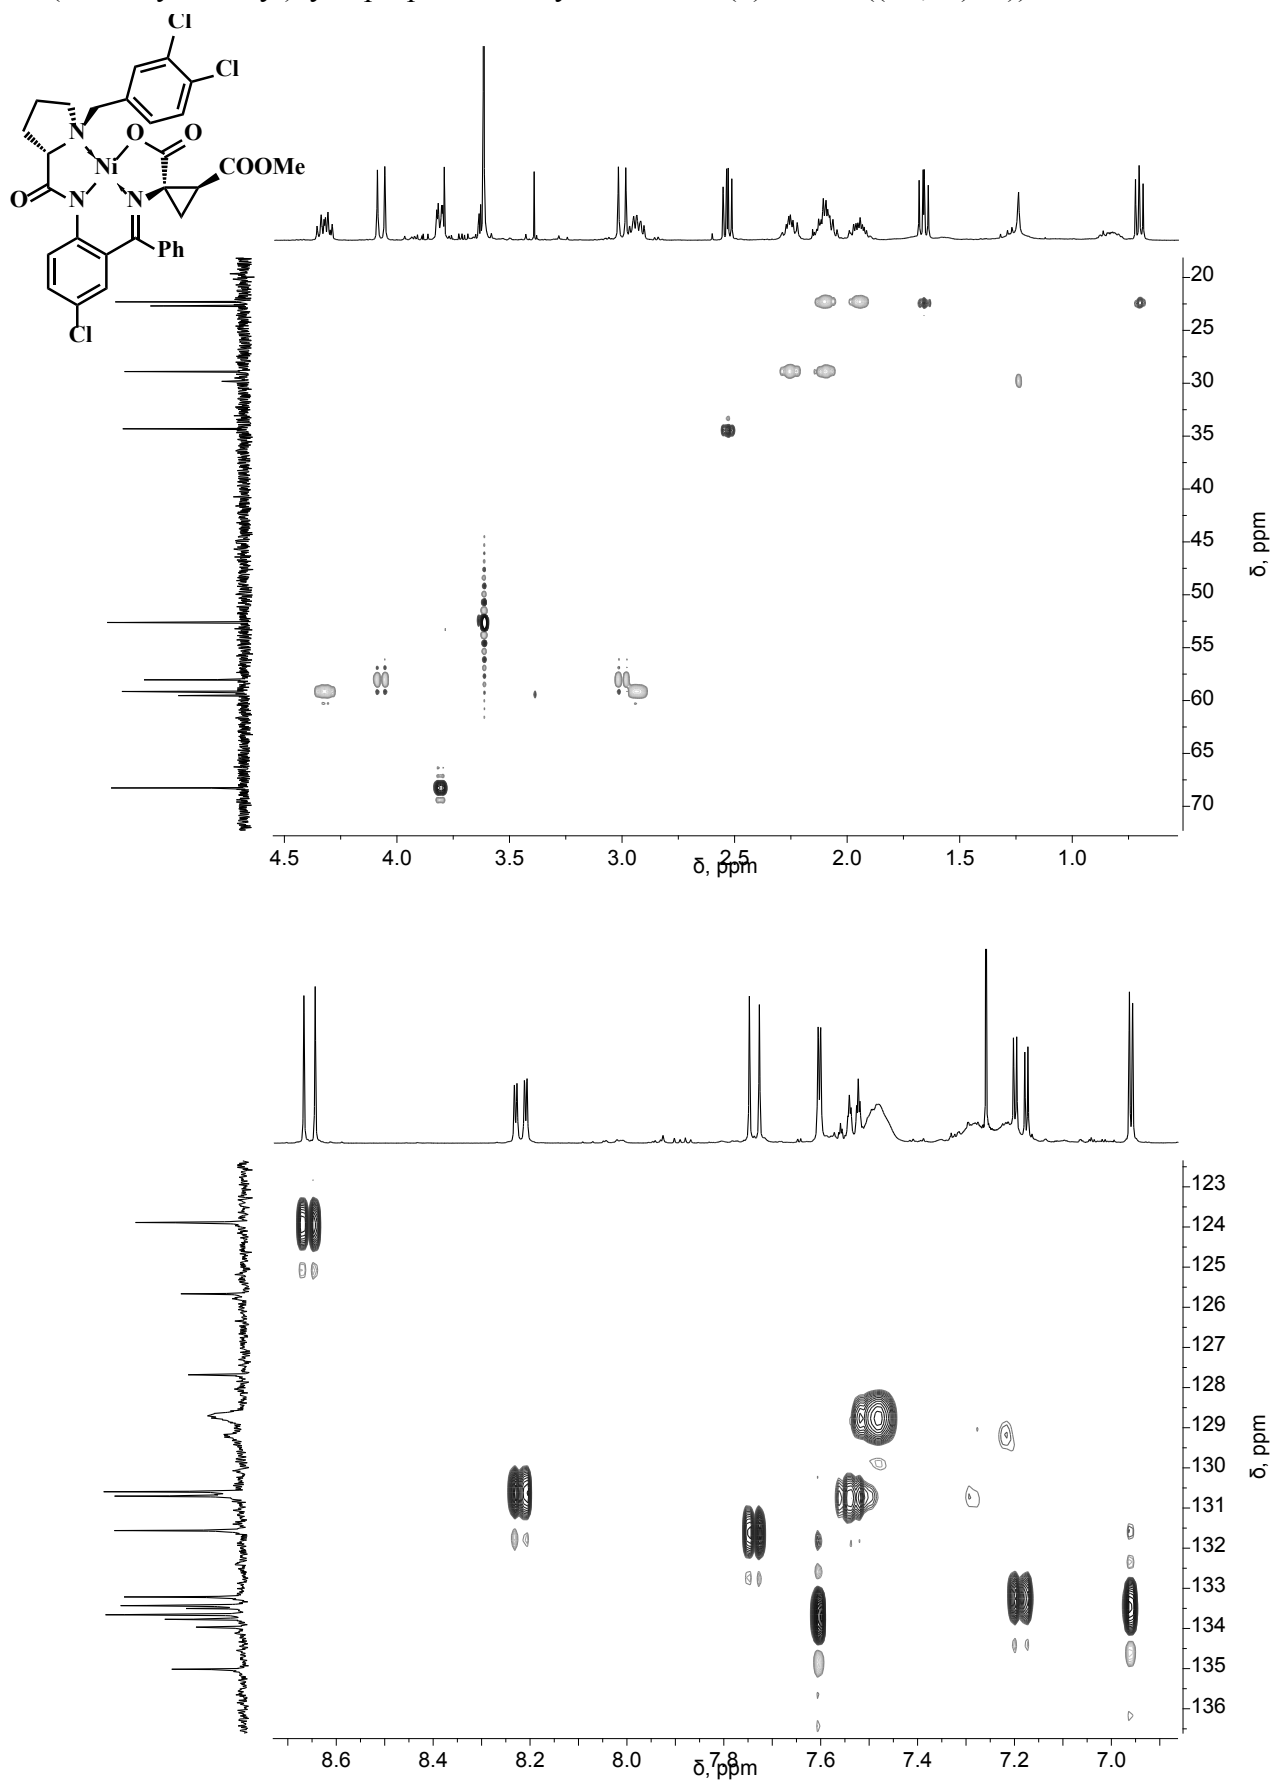

19. HMBC spectrum of the Ni complex of Schiff base of (1*R*,2*S*)-1-amino-2-(methoxycarbonyl)cyclopropanecarboxylic acid and (*S*)-CBPB ((1*R*,2*S*)-**II**)

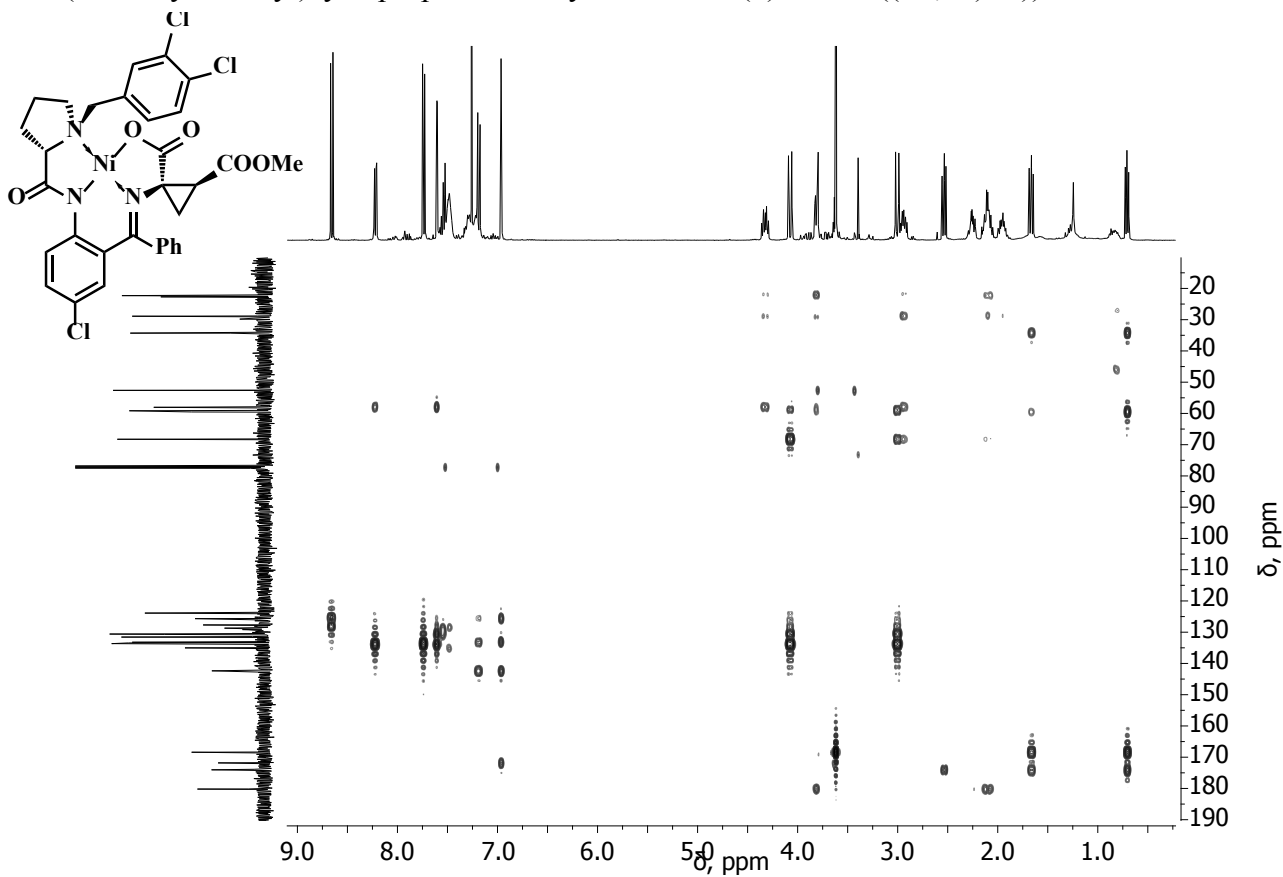

20. NOESY-1D spectra (saturation of proton H<sub>29</sub>) (upper) and <sup>1</sup>H NMR spectrum (bottom) of the Ni complex of Schiff base of (1*R*,2*S*)-1-amino-2-(methoxycarbonyl)cyclopropanecarboxylic acid and (*S*)-CBPB ((1*R*,2*S*)-II)

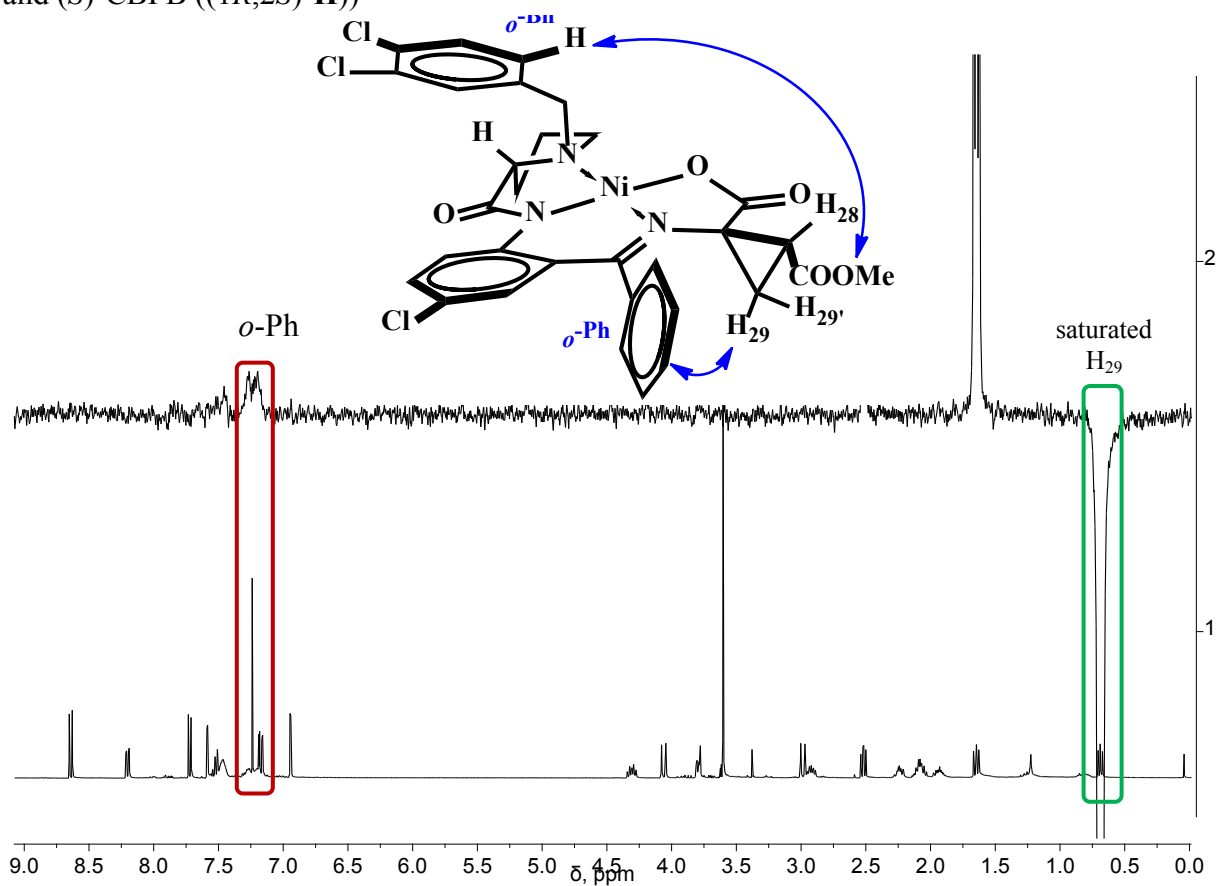



21. NOESY-1D spectra (saturation of proton *o*-Bn) (upper) and <sup>1</sup>H NMR spectrum (bottom) of the Ni complex of Schiff base of (1*R*,2*S*)-1-amino-2-(methoxycarbonyl)cyclopropanecarboxylic acid and (*S*)-CBPB ((1*R*,2*S*)-II)

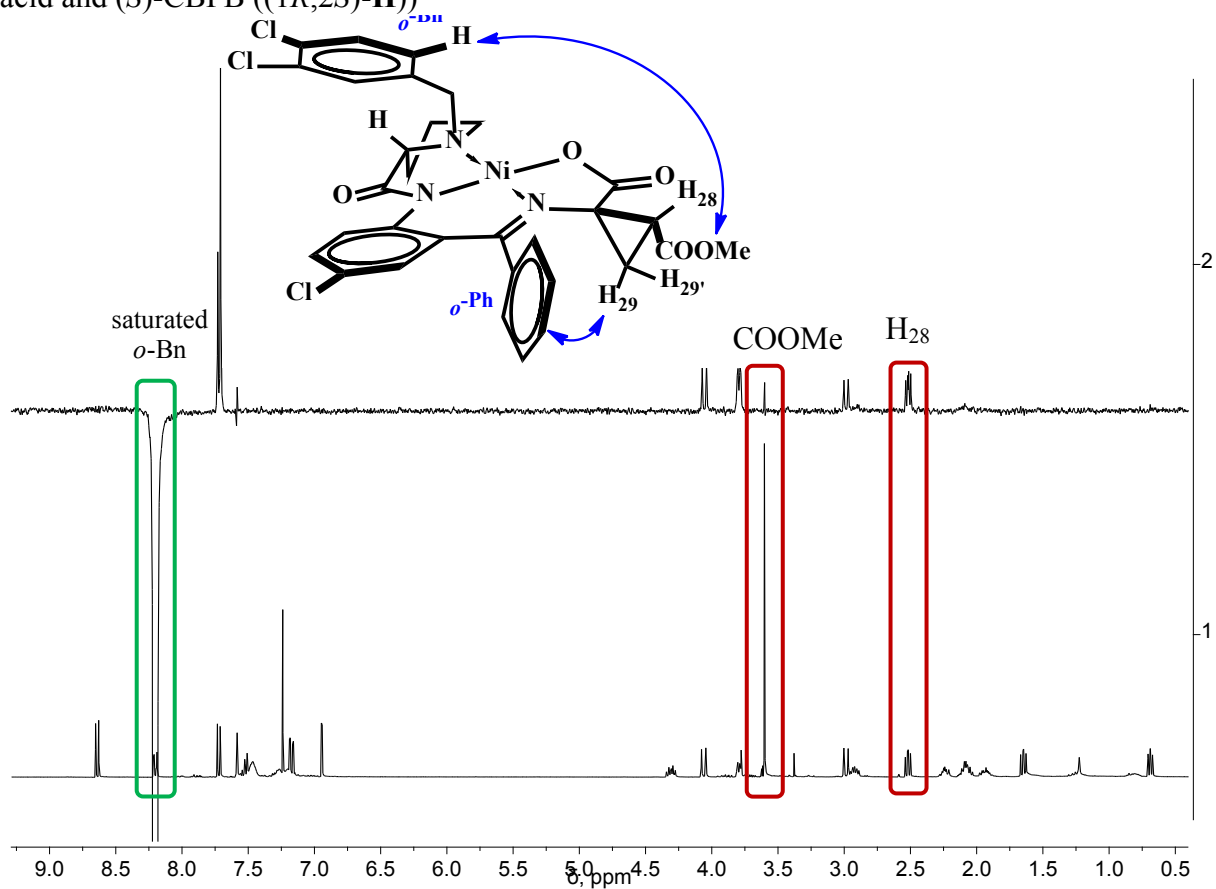

22.  $^1\text{H}$  NMR spectrum of the Ni complex of Schiff base of (1*S*,2*R*)-1-amino-2-(methoxycarbonyl)cyclopropanecarboxylic acid and (*S*)-CBPB ((1*S*,2*R*)-**II**)

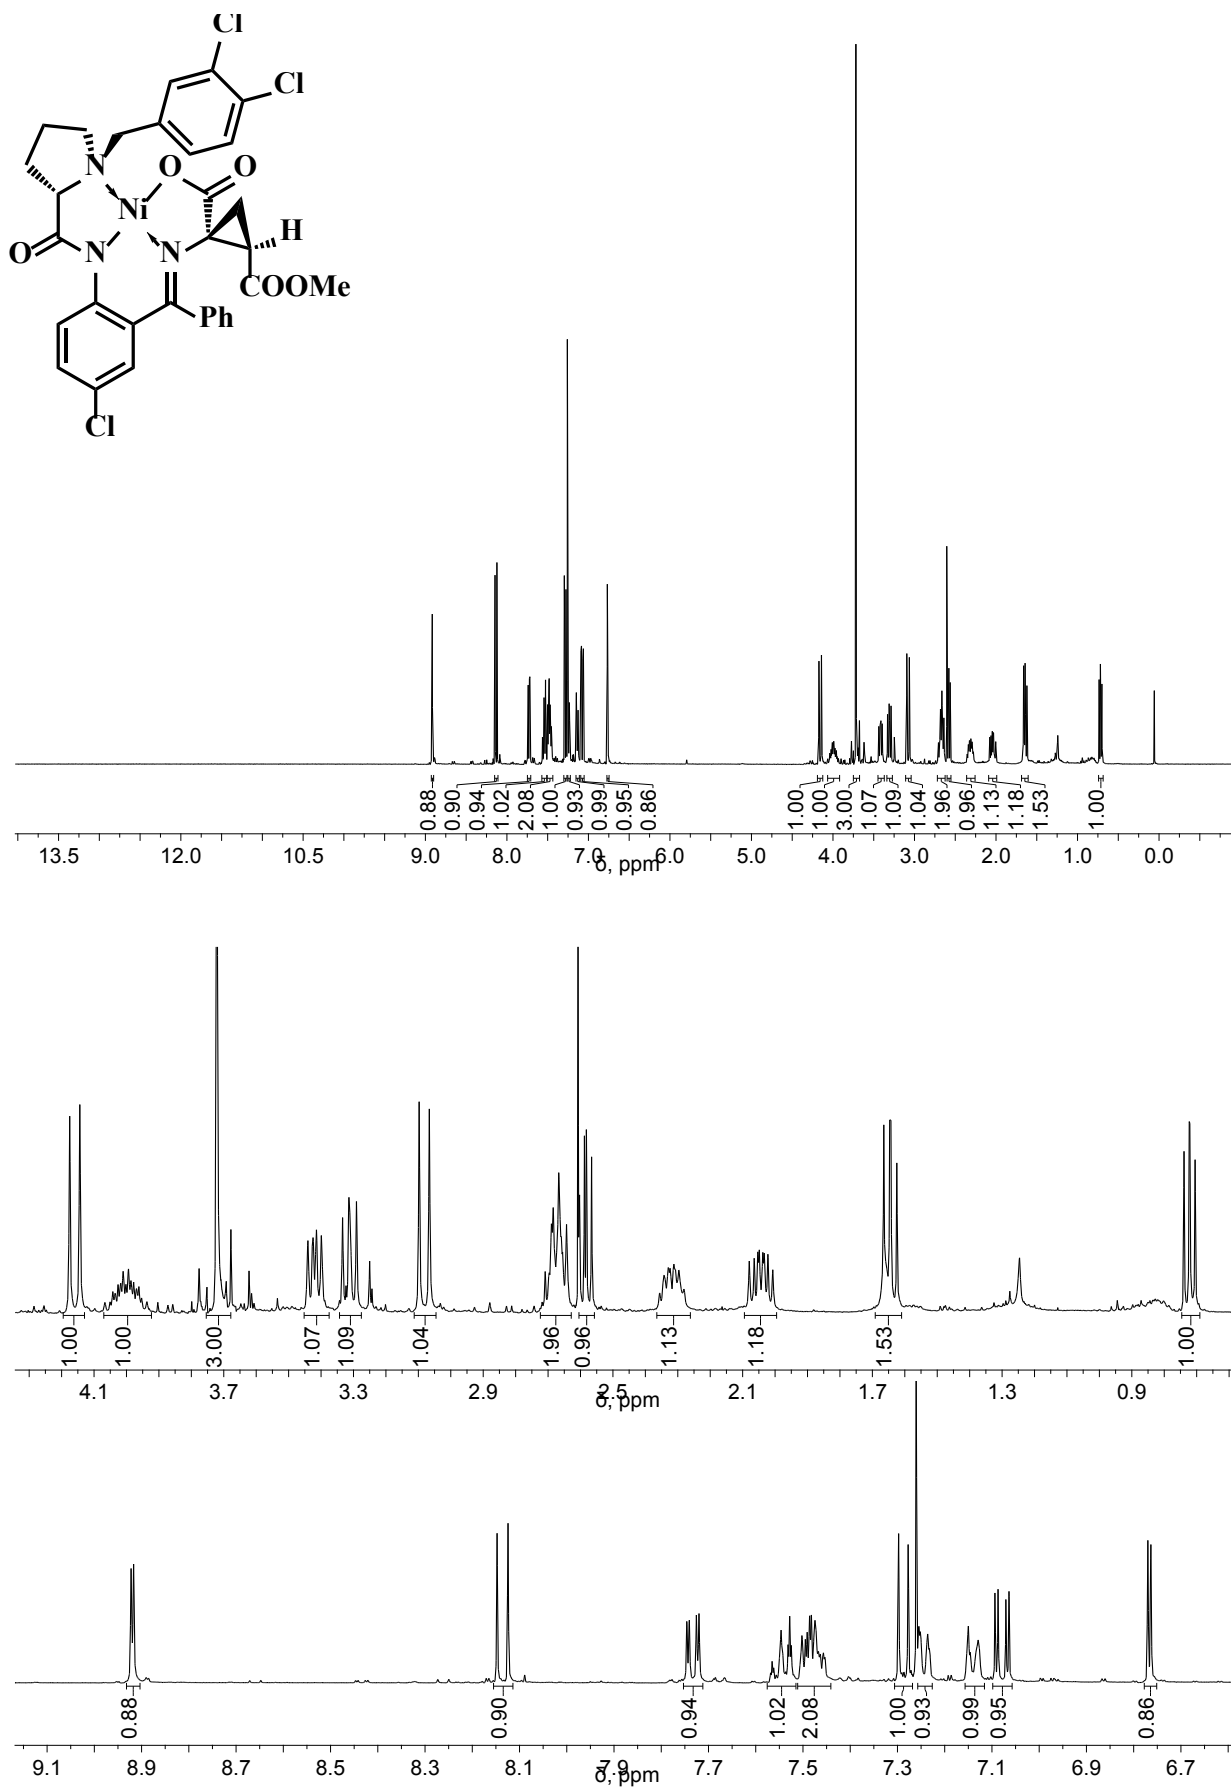

23.  $^{13}\text{C}$  NMR spectrum of the Ni complex of Schiff base of (1*S*,2*R*)-1-amino-2-(methoxycarbonyl)cyclopropanecarboxylic acid and (*S*)-CBPB ((1*S*,2*R*)-**II**)

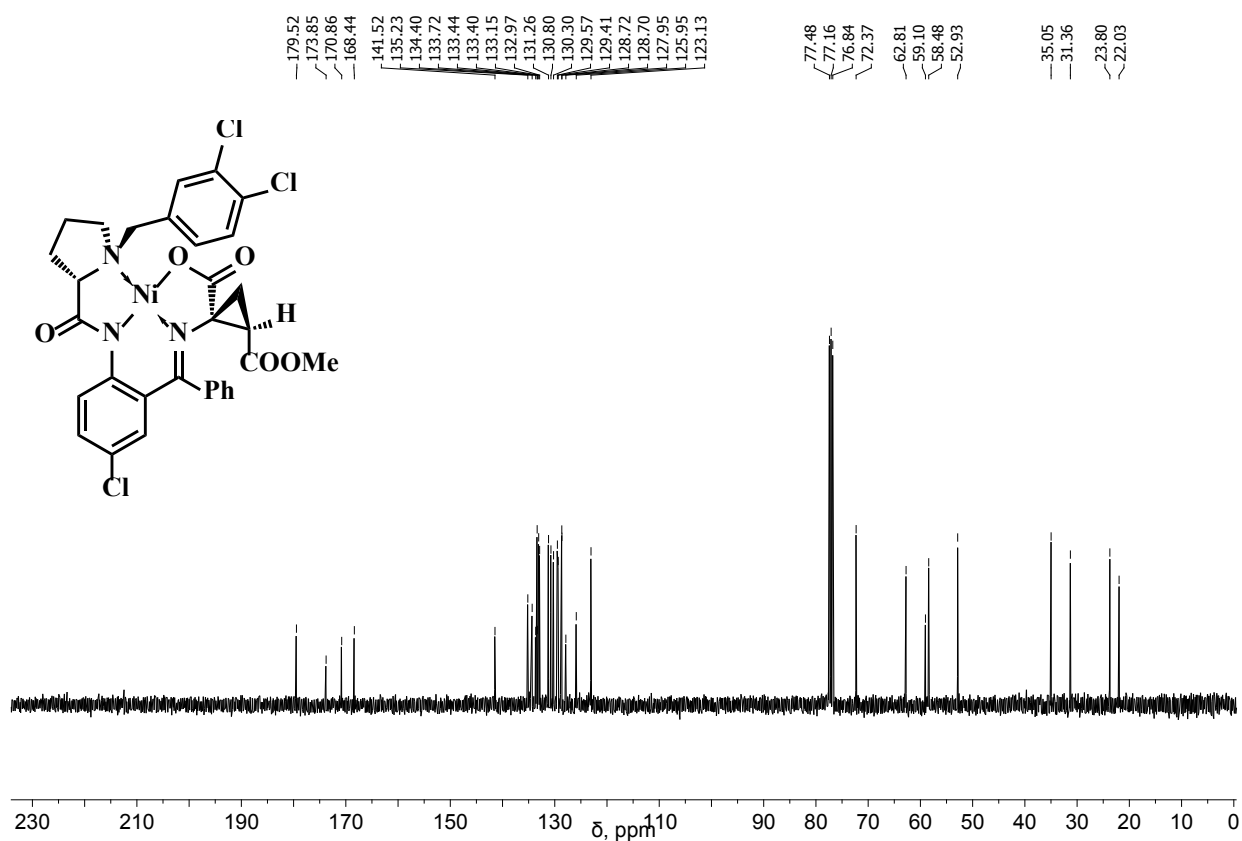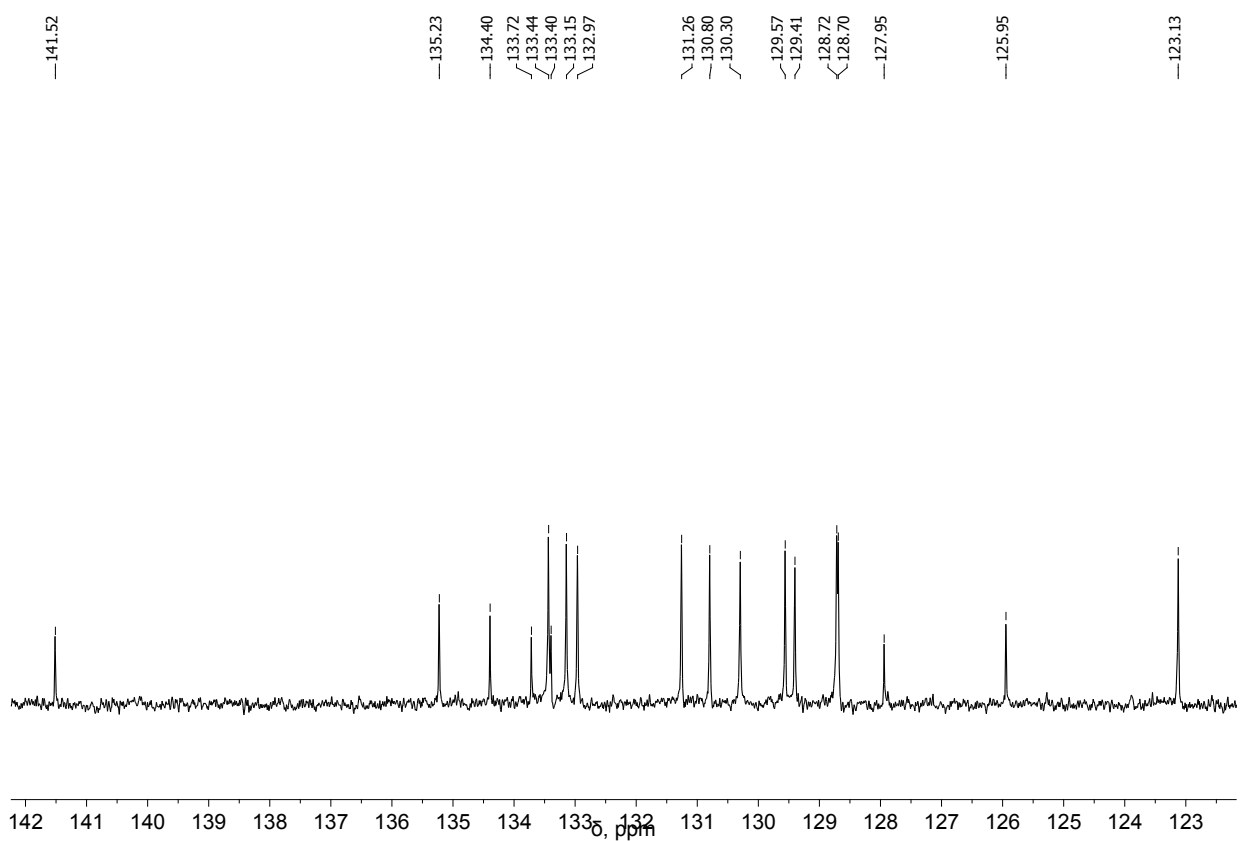

24. HSQC spectrum of the Ni complex of Schiff base of (1*S*,2*R*)-1-amino-2-(methoxycarbonyl)cyclopropanecarboxylic acid and (*S*)-CBPB ((1*S*,2*R*)-**II**)

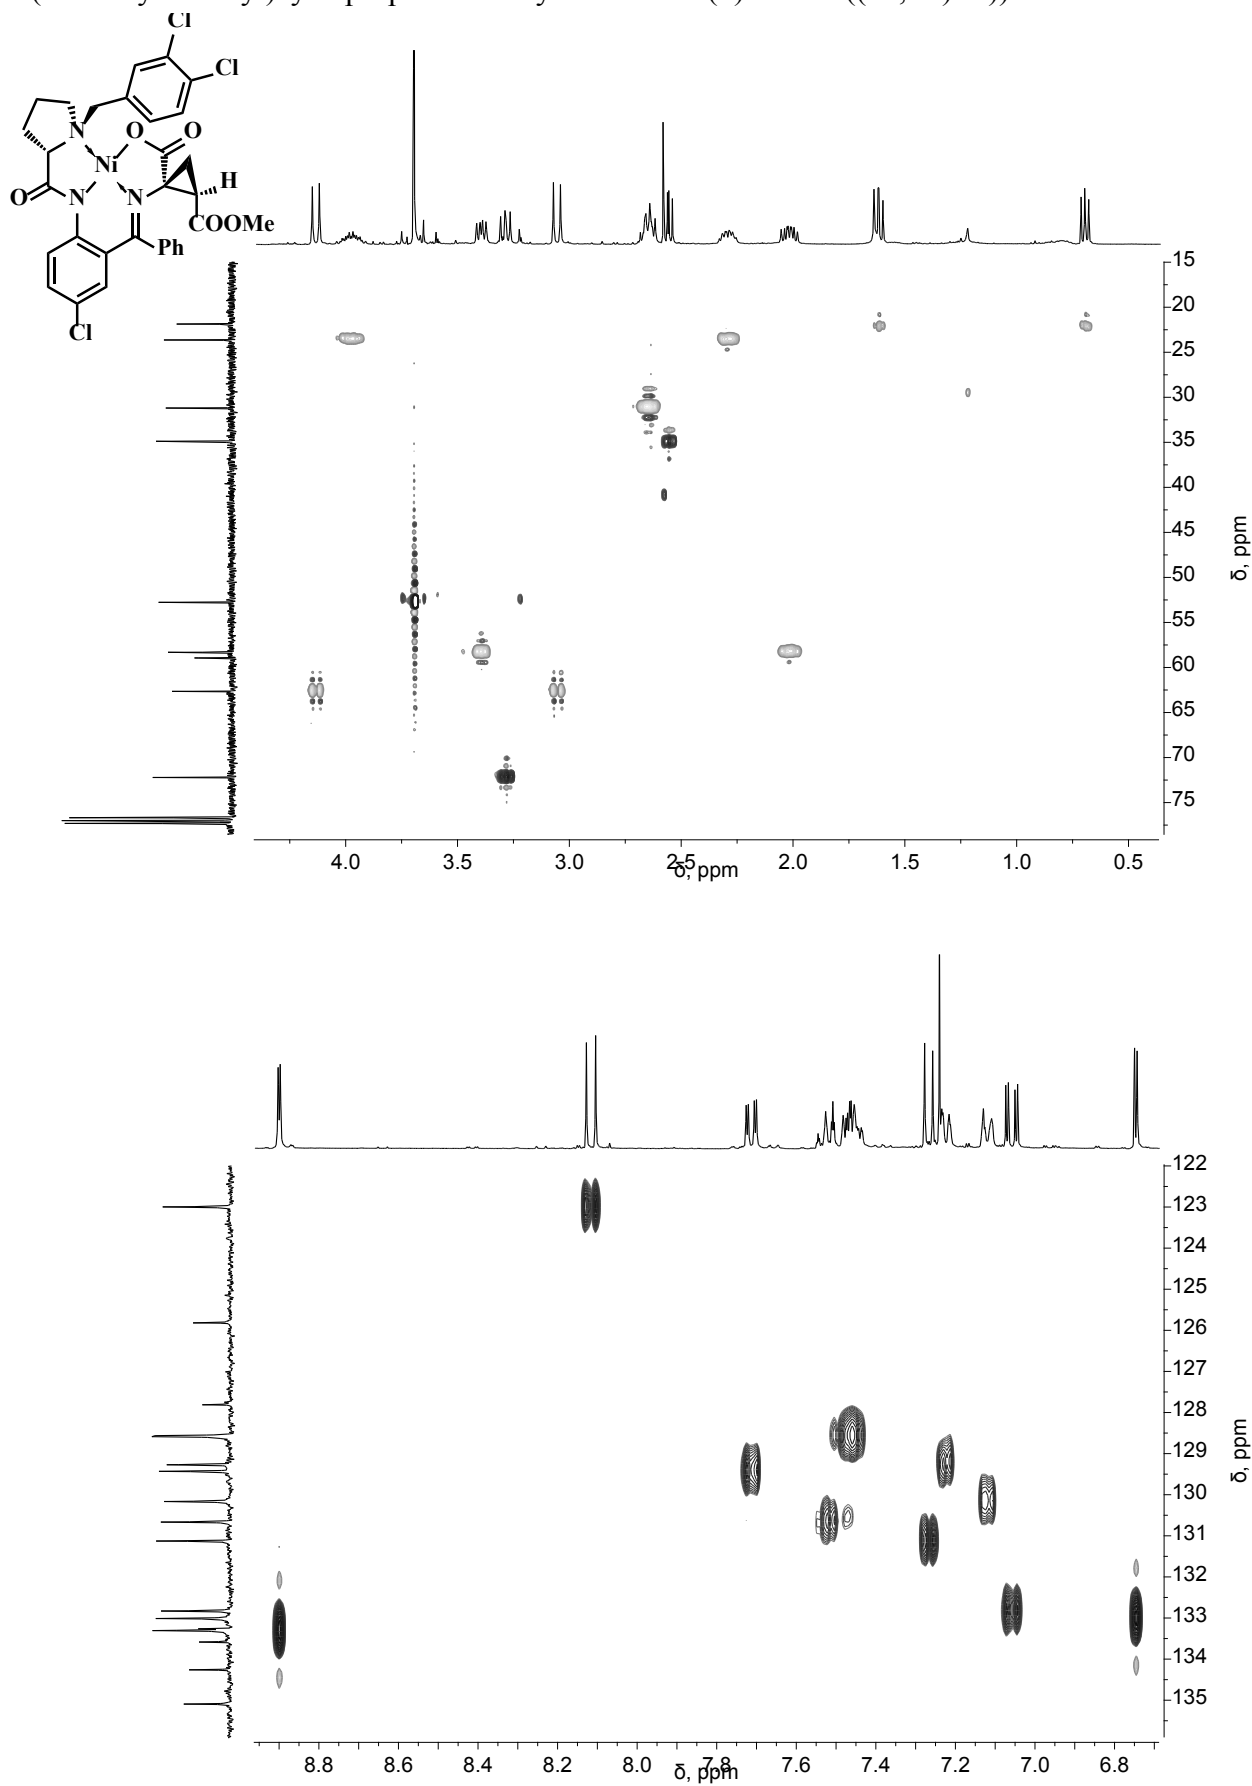

25. HMBC spectrum of the Ni complex of Schiff base of (1*S*,2*R*)-1-amino-2-(methoxycarbonyl)cyclopropanecarboxylic acid and (*S*)-CBPB ((1*S*,2*R*)-**II**)

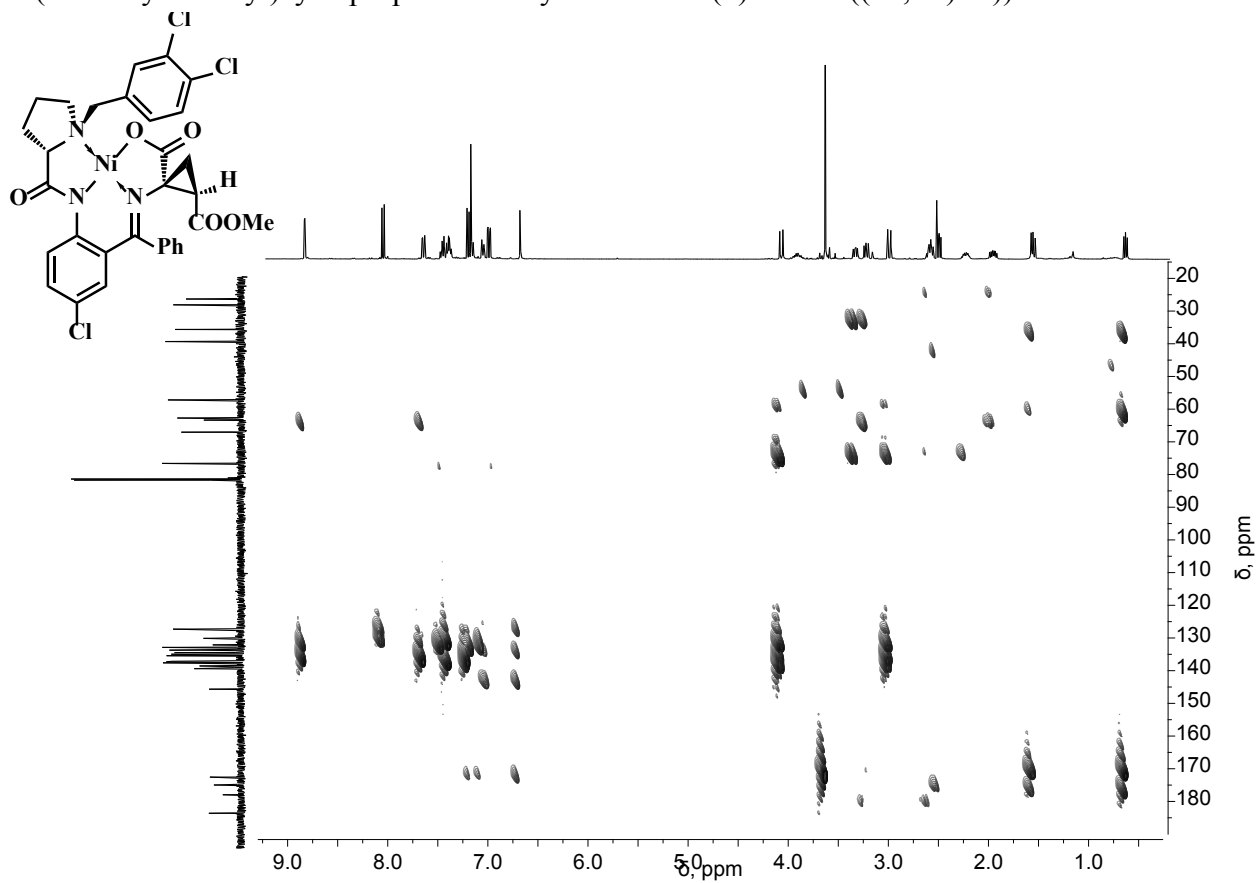

26. NOESY-2D spectrum of the Ni complex of Schiff base of (1*S*,2*R*)-1-amino-2-(methoxycarbonyl)cyclopropanecarboxylic acid and (*S*)-CBPB ((1*S*,2*R*)-**II**)

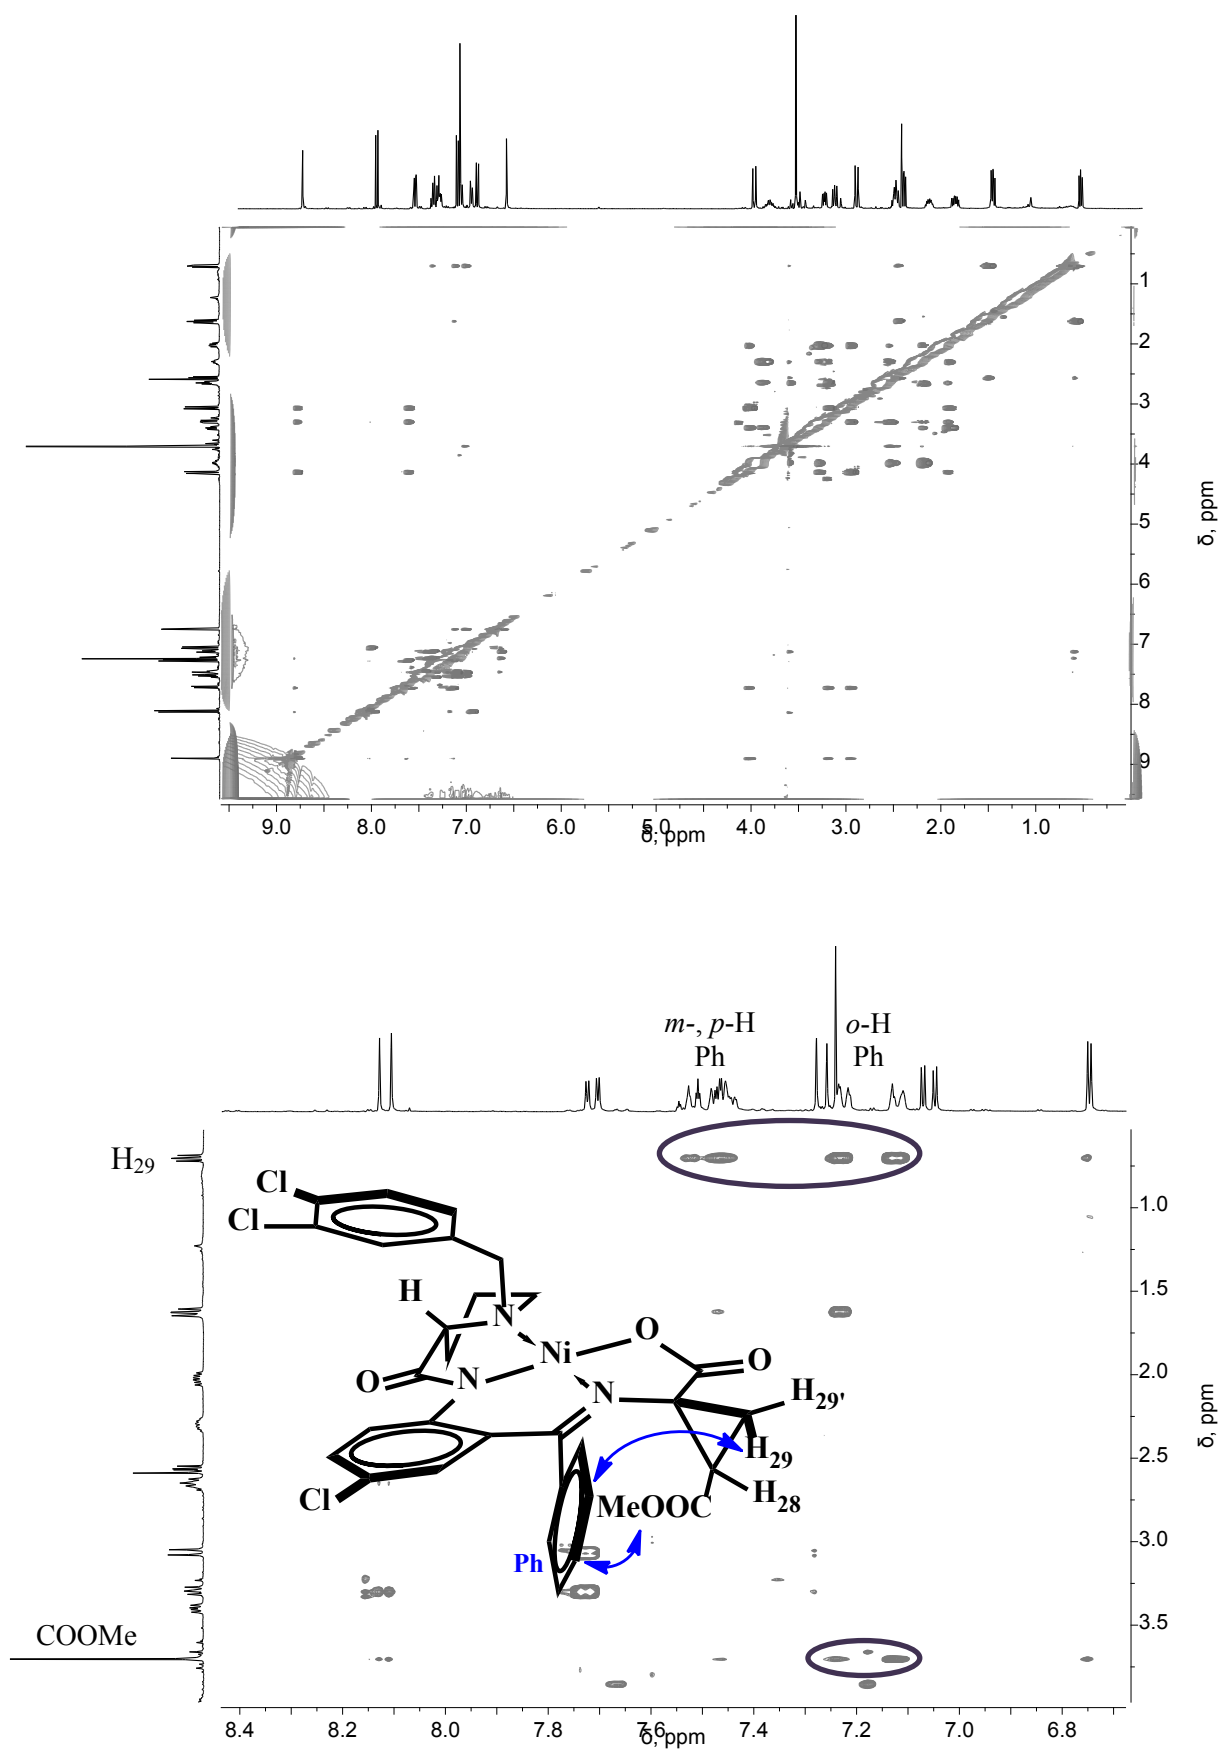

27. ESI-HRMS data for the Ni complex of Schiff base of (1*R*,2*S*)-1-amino-2-(methoxycarbonyl)cyclopropanecarboxylic acid and (*S*)-BPB ((1*R*,2*S*)-**I**)

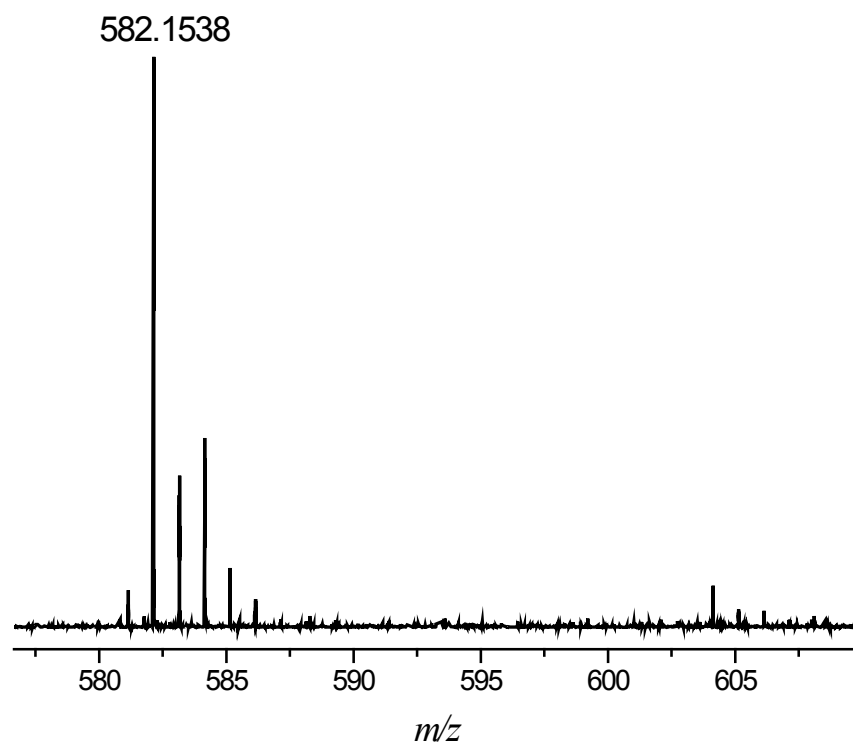

28. ESI-HRMS data for the Ni complex of Schiff base of (1*S*,2*R*)-1-amino-2-(methoxycarbonyl)cyclopropanecarboxylic acid and (*S*)-BPB ((1*S*,2*R*)-**I**)

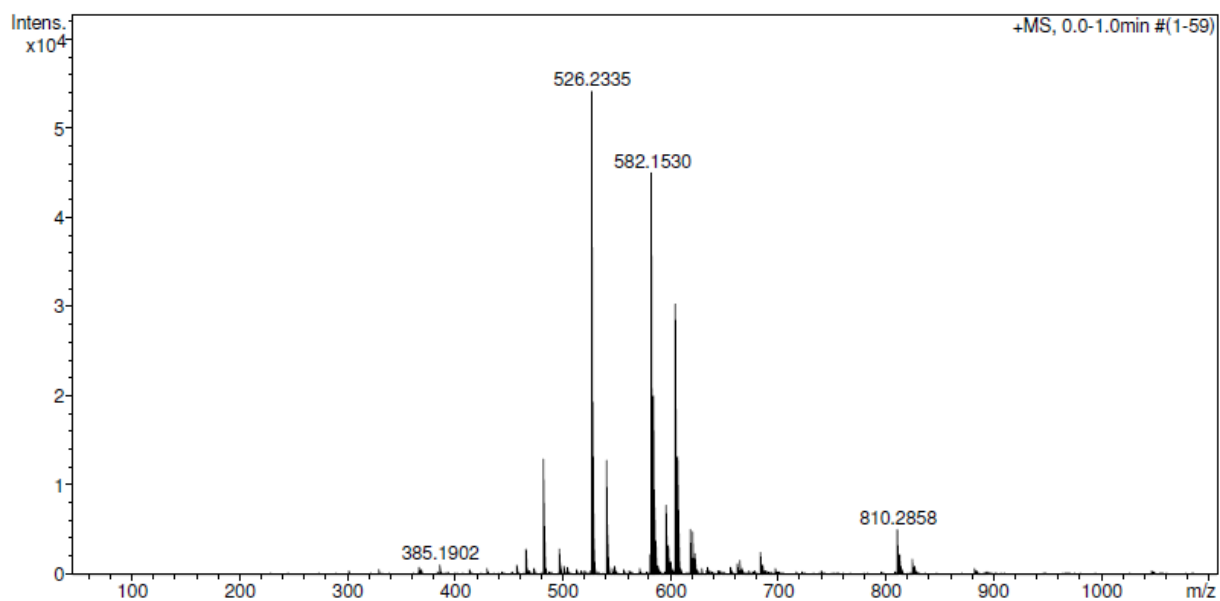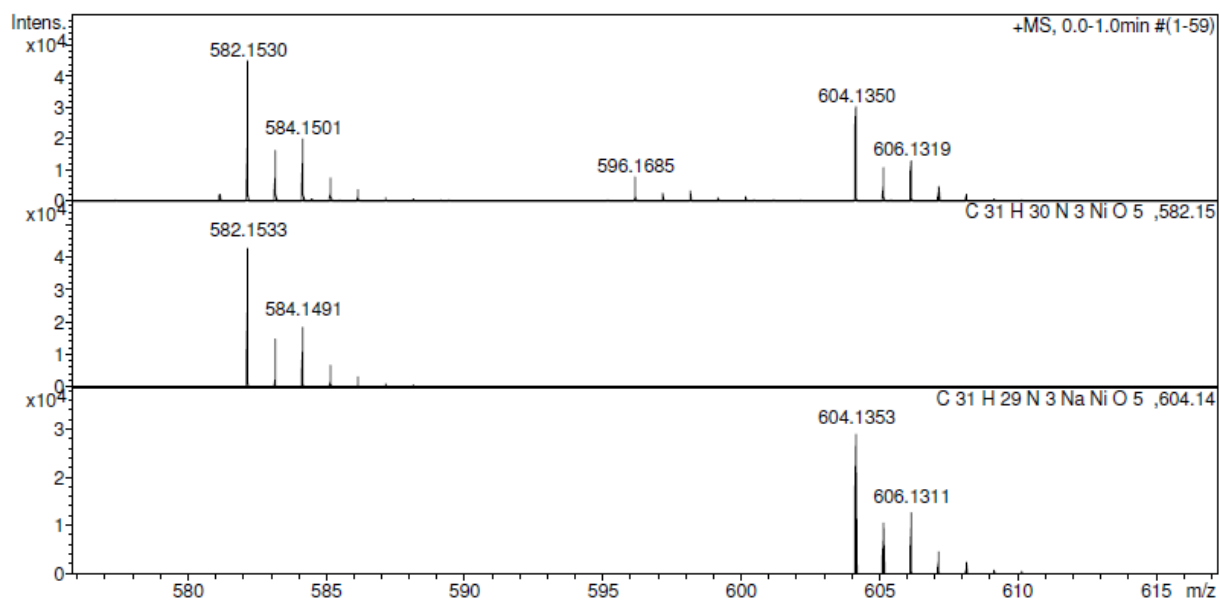



29. ESI-HRMS data for the Ni complex of Schiff base of (1*S*,2*S*)-1-amino-2-(methoxycarbonyl)cyclopropanecarboxylic acid and (*S*)-BPB ((1*S*,2*S*)-**I**)

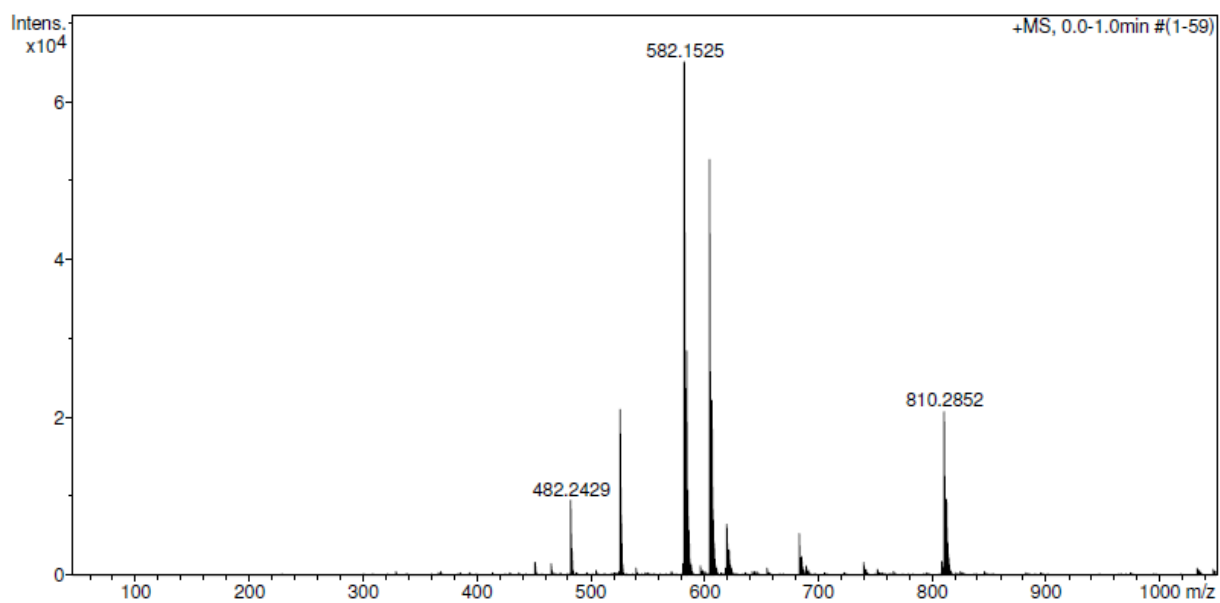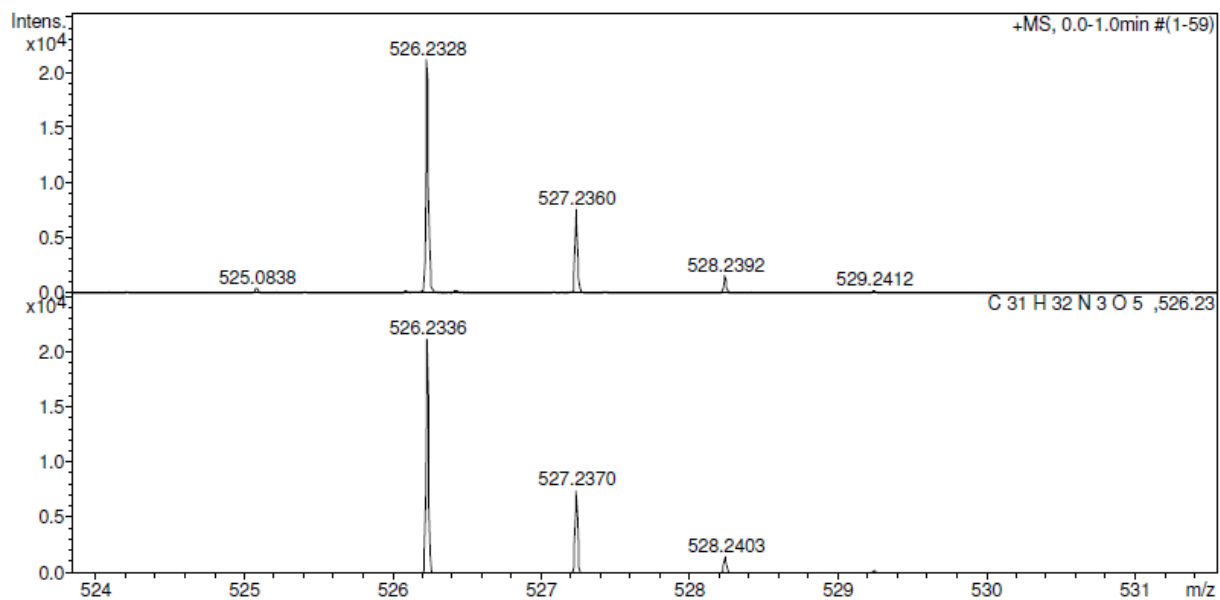

30. ESI-HRMS data for the Ni complex of Schiff base of (1*R*,2*S*)-1-amino-2-(methoxycarbonyl)cyclopropanecarboxylic acid and (*S*)-CBPB ((1*R*,2*S*)-**II**)

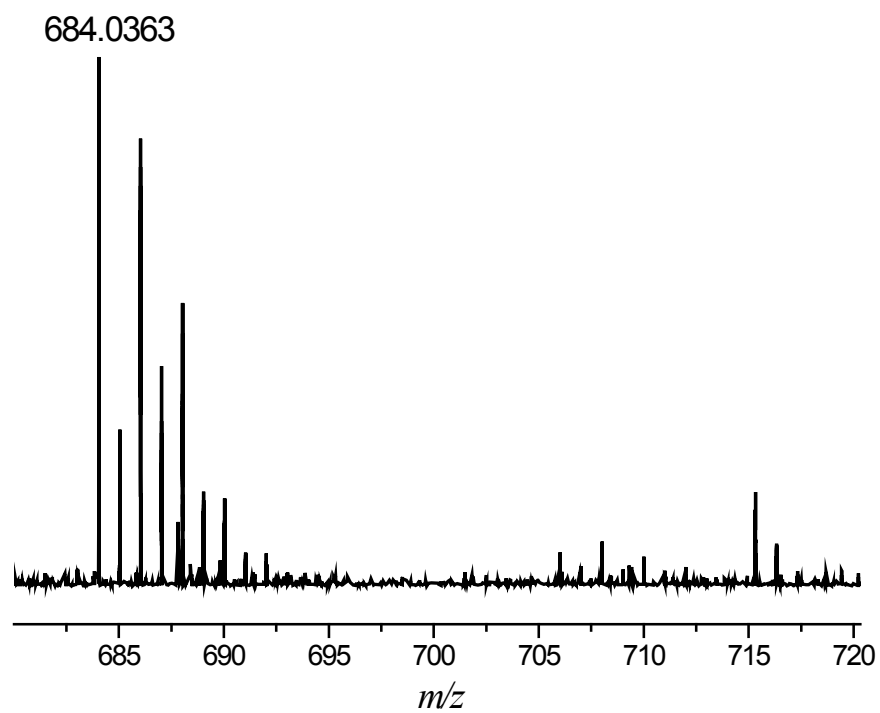

31. ESI-HRMS data for the Ni complex of Schiff base of (1*S*,2*R*)-1-amino-2-(methoxycarbonyl)cyclopropanecarboxylic acid and (*S*)-CBPB ((1*S*,2*R*)-**II**)

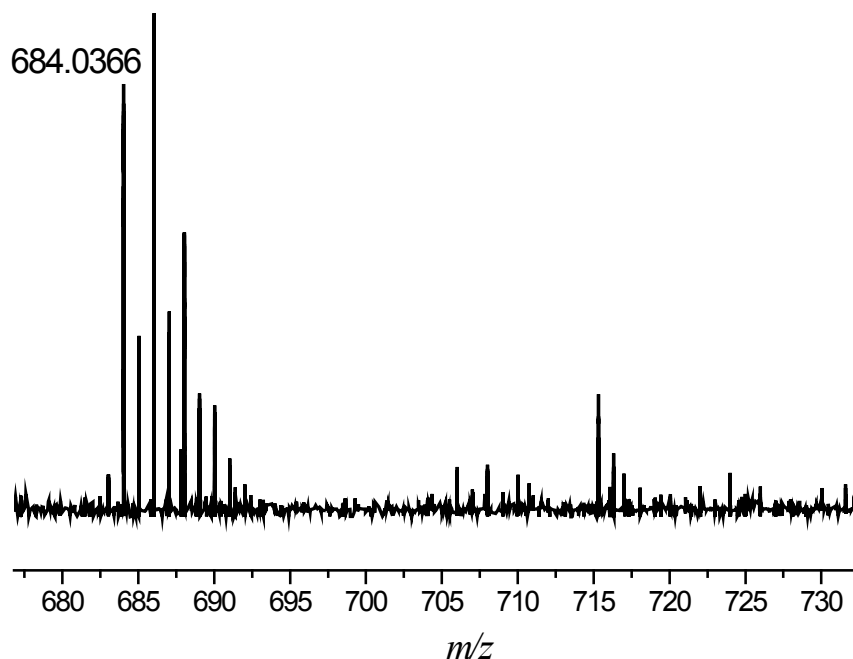

32. Optimized structures and energies of intermediates and transition states.

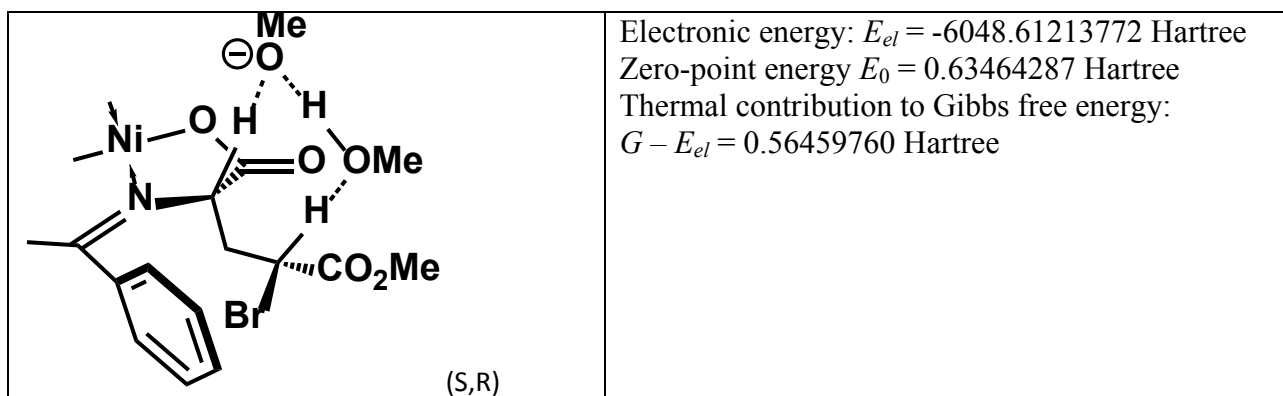

Cartesian coordinates:

| Element | x               | y               | z              |
|---------|-----------------|-----------------|----------------|
| C       | -1.020760000000 | -1.961254000000 | 1.533748000000 |
| C       | -0.803217000000 | -3.018557000000 | 2.459126000000 |
| C       | -1.784661000000 | -3.429755000000 | 3.358717000000 |
| C       | -3.037893000000 | -2.789085000000 | 3.334716000000 |
| C       | -3.287692000000 | -1.753247000000 | 2.435733000000 |
| C       | -2.293615000000 | -1.296900000000 | 1.525842000000 |
| N       | -2.519293000000 | -0.219108000000 | 0.674185000000 |

|   |                 |                 |                 |
|---|-----------------|-----------------|-----------------|
| C | 0.087265000000  | -1.602758000000 | 0.638068000000  |
| H | 0.180279000000  | -3.507902000000 | 2.474599000000  |
| H | -1.577799000000 | -4.241963000000 | 4.071714000000  |
| H | -3.832153000000 | -3.094841000000 | 4.034018000000  |
| H | -4.266647000000 | -1.265081000000 | 2.427021000000  |
| C | 3.292336000000  | -3.690404000000 | 0.402536000000  |
| C | 2.803905000000  | -4.849199000000 | -0.220554000000 |
| C | 1.443988000000  | -4.930889000000 | -0.566184000000 |
| C | 0.582187000000  | -3.866808000000 | -0.271433000000 |
| C | 1.074813000000  | -2.692796000000 | 0.347472000000  |
| C | 2.442087000000  | -2.606297000000 | 0.680994000000  |
| H | 2.867635000000  | -1.675332000000 | 1.106000000000  |
| H | 4.357387000000  | -3.619204000000 | 0.671949000000  |
| H | 3.481361000000  | -5.688705000000 | -0.442070000000 |
| H | 1.049971000000  | -5.831139000000 | -1.062780000000 |
| H | -0.484992000000 | -3.935901000000 | -0.532591000000 |
| N | 0.178973000000  | -0.401612000000 | 0.106626000000  |
| C | 1.315858000000  | 0.010160000000  | -0.735495000000 |
| C | 1.258713000000  | 1.526670000000  | -0.889579000000 |
| O | 2.173341000000  | 2.160343000000  | -1.434497000000 |
| O | 0.195589000000  | 2.102865000000  | -0.394540000000 |
| C | -3.779298000000 | 0.207752000000  | 0.336463000000  |
| C | -3.776646000000 | 1.538716000000  | -0.396625000000 |
| O | -4.851487000000 | -0.392109000000 | 0.520193000000  |
| C | -3.880319000000 | 1.371201000000  | -1.943188000000 |
| N | -2.504877000000 | 2.292074000000  | -0.157083000000 |
| H | -4.637348000000 | 2.130509000000  | -0.020263000000 |
| H | -4.810225000000 | 1.852785000000  | -2.299798000000 |
| H | -3.925497000000 | 0.304158000000  | -2.234423000000 |
| C | -2.512973000000 | 3.176272000000  | 1.046513000000  |
| C | -2.279335000000 | 3.072816000000  | -1.409875000000 |
| H | -1.631555000000 | 3.839321000000  | 0.946757000000  |
| C | -2.430030000000 | 2.407931000000  | 2.343591000000  |
| H | -3.425658000000 | 3.810899000000  | 1.013101000000  |
| H | -1.236848000000 | 3.434217000000  | -1.435932000000 |
| H | -2.971557000000 | 3.944151000000  | -1.408554000000 |
| C | -2.638622000000 | 2.085429000000  | -2.507651000000 |
| C | -1.168062000000 | 2.029115000000  | 2.850383000000  |
| C | -3.589993000000 | 1.992083000000  | 3.022378000000  |
| C | -1.071851000000 | 1.231993000000  | 4.000117000000  |
| H | -0.254274000000 | 2.373289000000  | 2.341351000000  |
| C | -3.494245000000 | 1.196533000000  | 4.176534000000  |
| H | -4.580222000000 | 2.285097000000  | 2.640218000000  |
| H | -4.409809000000 | 0.871408000000  | 4.693574000000  |
| H | -0.081686000000 | 0.938874000000  | 4.381052000000  |
| C | -2.236281000000 | 0.810218000000  | 4.663089000000  |

|    |                 |                 |                 |
|----|-----------------|-----------------|-----------------|
| H  | -2.161761000000 | 0.178357000000  | 5.561271000000  |
| H  | -2.839450000000 | 2.591738000000  | -3.471234000000 |
| H  | -1.793995000000 | 1.385346000000  | -2.672045000000 |
| Ni | -1.140835000000 | 0.897434000000  | 0.108402000000  |
| C  | 1.324707000000  | -0.738400000000 | -2.091910000000 |
| H  | 0.301350000000  | -0.737677000000 | -2.521784000000 |
| C  | 2.294066000000  | -0.135368000000 | -3.094023000000 |
| H  | 1.612741000000  | -1.787808000000 | -1.904167000000 |
| C  | 1.730807000000  | 1.082508000000  | -3.804451000000 |
| O  | 2.704646000000  | 1.847861000000  | -4.325367000000 |
| O  | 0.537427000000  | 1.330343000000  | -3.917651000000 |
| C  | 2.269232000000  | 3.056215000000  | -4.968369000000 |
| H  | 3.183259000000  | 3.549313000000  | -5.344021000000 |
| H  | 1.581487000000  | 2.835320000000  | -5.809290000000 |
| H  | 1.753336000000  | 3.714087000000  | -4.239542000000 |
| Br | 2.659939000000  | -1.465074000000 | -4.547731000000 |
| H  | 2.290649000000  | -0.169727000000 | -0.193800000000 |
| O  | 4.894906000000  | -0.004295000000 | -1.367029000000 |
| H  | 3.289452000000  | 0.079182000000  | -2.643792000000 |
| C  | 5.263916000000  | -1.344981000000 | -1.556897000000 |
| H  | 5.895857000000  | -1.744084000000 | -0.720892000000 |
| H  | 4.395663000000  | -2.044388000000 | -1.661364000000 |
| H  | 5.863788000000  | -1.450089000000 | -2.490965000000 |
| O  | 3.848567000000  | 0.033862000000  | 0.898511000000  |
| H  | 4.429254000000  | 0.051169000000  | -0.398866000000 |
| C  | 3.594946000000  | 1.282249000000  | 1.434521000000  |
| H  | 2.494291000000  | 1.509047000000  | 1.555232000000  |
| H  | 4.026162000000  | 1.423896000000  | 2.467559000000  |
| H  | 3.997326000000  | 2.137930000000  | 0.824432000000  |

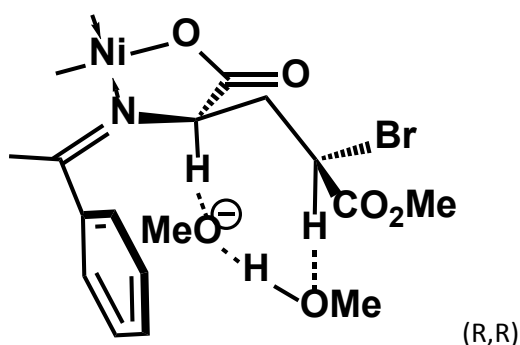

Electronic energy:  $E_{el} = -6048.60200959$  Hartree  
 Zero-point energy  $E_0 = 0.63493632$  Hartree  
 Thermal contribution to Gibbs free energy:  
 $G - E_{el} = 0.56318252$  Hartree

Cartesian coordinates:

| Element | x               | y               | z              |
|---------|-----------------|-----------------|----------------|
| C       | -1.845602000000 | -2.009302000000 | 0.594624000000 |
| C       | -1.998299000000 | -3.425026000000 | 0.668646000000 |
| C       | -3.180590000000 | -4.029866000000 | 1.082888000000 |
| C       | -4.270238000000 | -3.212579000000 | 1.441516000000 |

|   |                 |                 |                 |
|---|-----------------|-----------------|-----------------|
| C | -4.161126000000 | -1.825812000000 | 1.381032000000  |
| C | -2.961816000000 | -1.179198000000 | 0.958698000000  |
| N | -2.899988000000 | 0.203482000000  | 0.834267000000  |
| C | -0.561421000000 | -1.493545000000 | 0.112320000000  |
| H | -1.156113000000 | -4.058787000000 | 0.361778000000  |
| H | -3.260023000000 | -5.126876000000 | 1.116906000000  |
| H | -5.222112000000 | -3.662576000000 | 1.764691000000  |
| H | -5.020103000000 | -1.209353000000 | 1.666550000000  |
| C | 2.120374000000  | -3.799232000000 | 1.489367000000  |
| C | 2.737362000000  | -4.272955000000 | 0.319832000000  |
| C | 2.271461000000  | -3.846816000000 | -0.932776000000 |
| C | 1.203386000000  | -2.939158000000 | -1.034629000000 |
| C | 0.583989000000  | -2.464233000000 | 0.138193000000  |
| C | 1.041471000000  | -2.911035000000 | 1.400400000000  |
| H | 0.555625000000  | -2.542231000000 | 2.316829000000  |
| H | 2.480258000000  | -4.123639000000 | 2.477640000000  |
| H | 3.584624000000  | -4.973356000000 | 0.387630000000  |
| H | 2.750596000000  | -4.219989000000 | -1.850744000000 |
| H | 0.891494000000  | -2.554683000000 | -2.025811000000 |
| N | -0.401021000000 | -0.250978000000 | -0.305305000000 |
| C | 0.882436000000  | 0.199493000000  | -0.888787000000 |
| C | 0.670803000000  | 1.578584000000  | -1.505416000000 |
| O | 1.502739000000  | 2.106317000000  | -2.249340000000 |
| O | -0.455875000000 | 2.163558000000  | -1.175569000000 |
| C | -3.793860000000 | 1.027395000000  | 1.493593000000  |
| C | -3.977997000000 | 2.356354000000  | 0.784361000000  |
| O | -4.476427000000 | 0.739834000000  | 2.485598000000  |
| C | -5.059653000000 | 2.220767000000  | -0.328952000000 |
| N | -2.720111000000 | 2.760291000000  | 0.084189000000  |
| H | -4.272788000000 | 3.130308000000  | 1.518873000000  |
| H | -5.802079000000 | 3.034036000000  | -0.209970000000 |
| H | -5.606523000000 | 1.260443000000  | -0.259585000000 |
| C | -1.906622000000 | 3.753965000000  | 0.850165000000  |
| C | -3.141696000000 | 3.295157000000  | -1.247538000000 |
| H | -1.170080000000 | 4.168704000000  | 0.139126000000  |
| C | -1.183100000000 | 3.167904000000  | 2.042449000000  |
| H | -2.583686000000 | 4.578621000000  | 1.165147000000  |
| H | -2.273202000000 | 3.300564000000  | -1.930126000000 |
| H | -3.499211000000 | 4.340833000000  | -1.112713000000 |
| C | -4.286585000000 | 2.379835000000  | -1.646549000000 |
| C | 0.208258000000  | 2.944488000000  | 1.973769000000  |
| C | -1.855961000000 | 2.855840000000  | 3.242584000000  |
| C | 0.905379000000  | 2.401968000000  | 3.063524000000  |
| H | 0.752784000000  | 3.204973000000  | 1.053351000000  |
| C | -1.163937000000 | 2.293057000000  | 4.326413000000  |
| H | -2.933190000000 | 3.054944000000  | 3.344527000000  |

|    |                 |                 |                 |
|----|-----------------|-----------------|-----------------|
| H  | -1.708854000000 | 2.045186000000  | 5.250584000000  |
| H  | 1.993863000000  | 2.247588000000  | 2.992764000000  |
| C  | 0.217941000000  | 2.059825000000  | 4.239701000000  |
| H  | 0.761120000000  | 1.626331000000  | 5.093698000000  |
| H  | -4.905630000000 | 2.812550000000  | -2.455806000000 |
| H  | -3.892589000000 | 1.405360000000  | -2.000481000000 |
| Ni | -1.623092000000 | 1.135565000000  | -0.146566000000 |
| C  | 2.025404000000  | 0.219585000000  | 0.145402000000  |
| H  | 2.168626000000  | -0.798233000000 | 0.549042000000  |
| C  | 3.366824000000  | 0.655881000000  | -0.434451000000 |
| H  | 1.731248000000  | 0.847540000000  | 1.007933000000  |
| H  | 1.144105000000  | -0.468411000000 | -1.756867000000 |
| O  | 3.339621000000  | -0.386217000000 | -3.396889000000 |
| H  | 3.347419000000  | 0.693876000000  | -1.548494000000 |
| C  | 4.074656000000  | -1.543021000000 | -3.105361000000 |
| H  | 3.944589000000  | -1.908343000000 | -2.053819000000 |
| H  | 3.801564000000  | -2.407541000000 | -3.764221000000 |
| H  | 5.166172000000  | -1.362997000000 | -3.250624000000 |
| O  | 1.011393000000  | -1.255541000000 | -3.559882000000 |
| H  | 2.313525000000  | -0.703165000000 | -3.468799000000 |
| C  | 4.516868000000  | -0.242931000000 | -0.001994000000 |
| C  | 0.048257000000  | -0.397103000000 | -4.049390000000 |
| H  | -0.612839000000 | -0.864416000000 | -4.836304000000 |
| H  | -0.677103000000 | -0.025875000000 | -3.263842000000 |
| H  | 0.457633000000  | 0.539164000000  | -4.523445000000 |
| Br | 3.852492000000  | 2.505149000000  | 0.133427000000  |
| O  | 5.639109000000  | 0.034234000000  | -0.687499000000 |
| O  | 4.439260000000  | -1.129243000000 | 0.837266000000  |
| C  | 6.781317000000  | -0.781578000000 | -0.381747000000 |
| H  | 7.592069000000  | -0.430477000000 | -1.043854000000 |
| H  | 7.077717000000  | -0.661738000000 | 0.679992000000  |
| H  | 6.565312000000  | -1.851491000000 | -0.577140000000 |

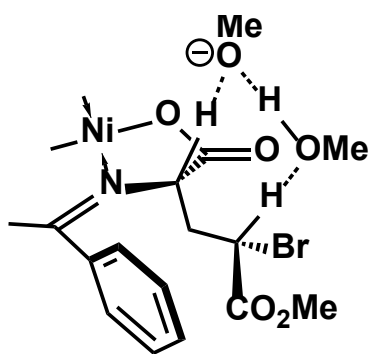

Electronic energy:  $E_{el} = -6048.60399736$  Hartree  
 Zero-point energy  $E_0 = 0.63390833$  Hartree  
 Thermal contribution to Gibbs free energy:  
 $G - E_{el} = 0.67797083$  Hartree

Cartesian coordinates:

| Element | x               | y               | z              |
|---------|-----------------|-----------------|----------------|
| C       | -1.051736000000 | -1.611398000000 | 1.414600000000 |
| C       | -0.788419000000 | -2.725082000000 | 2.259155000000 |

|   |                 |                 |                 |
|---|-----------------|-----------------|-----------------|
| C | -1.705863000000 | -3.166967000000 | 3.209939000000  |
| C | -2.937910000000 | -2.496008000000 | 3.327557000000  |
| C | -3.234136000000 | -1.408822000000 | 2.507203000000  |
| C | -2.309314000000 | -0.929035000000 | 1.538382000000  |
| N | -2.588506000000 | 0.185306000000  | 0.751417000000  |
| C | -0.000048000000 | -1.210783000000 | 0.473542000000  |
| H | 0.181257000000  | -3.234268000000 | 2.170344000000  |
| H | -1.465481000000 | -4.023920000000 | 3.856795000000  |
| H | -3.678775000000 | -2.820167000000 | 4.075398000000  |
| H | -4.198086000000 | -0.900682000000 | 2.605761000000  |
| C | 3.191811000000  | -3.255181000000 | -0.101676000000 |
| C | 2.675183000000  | -4.350740000000 | -0.810098000000 |
| C | 1.297190000000  | -4.415543000000 | -1.079102000000 |
| C | 0.448450000000  | -3.393754000000 | -0.634228000000 |
| C | 0.971345000000  | -2.278150000000 | 0.063139000000  |
| C | 2.353718000000  | -2.213551000000 | 0.333276000000  |
| H | 2.792304000000  | -1.325826000000 | 0.837981000000  |
| H | 4.269922000000  | -3.202391000000 | 0.116165000000  |
| H | 3.343907000000  | -5.154462000000 | -1.155569000000 |
| H | 0.879058000000  | -5.269085000000 | -1.635259000000 |
| H | -0.631604000000 | -3.447256000000 | -0.841990000000 |
| N | 0.062201000000  | 0.012584000000  | -0.011027000000 |
| C | 1.169121000000  | 0.450262000000  | -0.881594000000 |
| C | 1.143438000000  | 1.977205000000  | -0.937709000000 |
| O | 2.086490000000  | 2.640561000000  | -1.375259000000 |
| O | 0.033403000000  | 2.521332000000  | -0.496015000000 |
| C | -3.870089000000 | 0.622027000000  | 0.523919000000  |
| C | -3.931175000000 | 1.982500000000  | -0.150079000000 |
| O | -4.925645000000 | 0.011608000000  | 0.761966000000  |
| C | -4.228741000000 | 1.882169000000  | -1.676280000000 |
| N | -2.627423000000 | 2.712525000000  | -0.036877000000 |
| H | -4.729830000000 | 2.565464000000  | 0.353860000000  |
| H | -5.153912000000 | 2.443626000000  | -1.906825000000 |
| H | -4.390211000000 | 0.833883000000  | -1.992615000000 |
| C | -2.501879000000 | 3.586105000000  | 1.169406000000  |
| C | -2.511437000000 | 3.500293000000  | -1.300242000000 |
| H | -1.623836000000 | 4.234708000000  | 0.987181000000  |
| C | -2.305278000000 | 2.799259000000  | 2.442571000000  |
| H | -3.404239000000 | 4.233104000000  | 1.231446000000  |
| H | -1.467204000000 | 3.833033000000  | -1.429981000000 |
| H | -3.174511000000 | 4.390459000000  | -1.222060000000 |
| C | -3.015790000000 | 2.535203000000  | -2.359223000000 |
| C | -1.003501000000 | 2.423709000000  | 2.838779000000  |
| C | -3.403130000000 | 2.358778000000  | 3.204888000000  |
| C | -0.808145000000 | 1.604464000000  | 3.960150000000  |
| H | -0.136696000000 | 2.784587000000  | 2.263278000000  |



|    |                 |                 |                 |
|----|-----------------|-----------------|-----------------|
| C  | -3.208196000000 | 1.539168000000  | 4.329284000000  |
| H  | -4.423429000000 | 2.650924000000  | 2.911643000000  |
| H  | -4.076260000000 | 1.193940000000  | 4.911364000000  |
| H  | 0.212526000000  | 1.314398000000  | 4.253948000000  |
| C  | -1.911639000000 | 1.154616000000  | 4.703763000000  |
| H  | -1.759018000000 | 0.504181000000  | 5.578648000000  |
| H  | -3.279951000000 | 3.047380000000  | -3.304069000000 |
| H  | -2.228335000000 | 1.787028000000  | -2.588668000000 |
| Ni | -1.255818000000 | 1.306641000000  | 0.090489000000  |
| C  | 1.059581000000  | -0.184183000000 | -2.282774000000 |
| H  | 0.076210000000  | 0.066381000000  | -2.730994000000 |
| C  | 2.208620000000  | 0.210421000000  | -3.211925000000 |
| H  | 1.075686000000  | -1.281755000000 | -2.157397000000 |
| H  | 2.149639000000  | 0.185161000000  | -0.414524000000 |
| O  | 4.621122000000  | 0.701941000000  | -1.315049000000 |
| H  | 3.023166000000  | 0.724070000000  | -2.640970000000 |
| C  | 5.221519000000  | -0.541922000000 | -1.550082000000 |
| H  | 5.848359000000  | -0.891856000000 | -0.688995000000 |
| H  | 4.490671000000  | -1.366935000000 | -1.755307000000 |
| H  | 5.893802000000  | -0.492100000000 | -2.438844000000 |
| O  | 3.676332000000  | 0.422300000000  | 0.963349000000  |
| H  | 4.172150000000  | 0.639163000000  | -0.329612000000 |
| C  | 3.132444000000  | 1.515920000000  | 1.604988000000  |
| H  | 2.000681000000  | 1.533166000000  | 1.606644000000  |
| H  | 3.413298000000  | 1.581269000000  | 2.696649000000  |
| H  | 3.429283000000  | 2.508613000000  | 1.164406000000  |
| Br | 1.619076000000  | 1.540534000000  | -4.563523000000 |
| C  | 2.897297000000  | -0.913471000000 | -3.976742000000 |
| O  | 3.855534000000  | -0.747391000000 | -4.715649000000 |
| O  | 2.366871000000  | -2.123998000000 | -3.716188000000 |
| C  | 3.031125000000  | -3.249985000000 | -4.312052000000 |
| H  | 2.437013000000  | -4.137229000000 | -4.032774000000 |
| H  | 3.071522000000  | -3.142595000000 | -5.414455000000 |
| H  | 4.062870000000  | -3.345477000000 | -3.918968000000 |

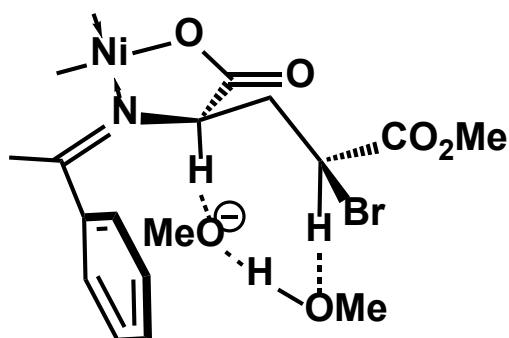

(R,S)

Cartesian coordinates:

Element x y z

Electronic energy:  $E_{el} = -6048.60829937$  Hartree

Zero-point energy  $E_0 = 0.63527983$  Hartree

Thermal contribution to Gibbs free energy:

$G - E_{el} = 0.56603040$  Hartree

|   |                 |                 |                 |
|---|-----------------|-----------------|-----------------|
| C | -1.598679000000 | -2.294334000000 | 0.647237000000  |
| C | -1.756272000000 | -3.709374000000 | 0.734811000000  |
| C | -2.932928000000 | -4.307480000000 | 1.173697000000  |
| C | -4.014631000000 | -3.484655000000 | 1.542891000000  |
| C | -3.901705000000 | -2.099083000000 | 1.469769000000  |
| C | -2.706768000000 | -1.459106000000 | 1.025036000000  |
| N | -2.644902000000 | -0.077680000000 | 0.890899000000  |
| C | -0.323165000000 | -1.787914000000 | 0.130841000000  |
| H | -0.923549000000 | -4.350038000000 | 0.417527000000  |
| H | -3.014503000000 | -5.403985000000 | 1.217050000000  |
| H | -4.963173000000 | -3.929027000000 | 1.883200000000  |
| H | -4.754588000000 | -1.477445000000 | 1.761914000000  |
| C | 2.354956000000  | -4.163502000000 | 1.395121000000  |
| C | 2.898637000000  | -4.661573000000 | 0.199295000000  |
| C | 2.394291000000  | -4.217417000000 | -1.032401000000 |
| C | 1.356351000000  | -3.272042000000 | -1.086811000000 |
| C | 0.806179000000  | -2.777287000000 | 0.112911000000  |
| C | 1.305718000000  | -3.236605000000 | 1.353972000000  |
| H | 0.873882000000  | -2.851945000000 | 2.290713000000  |
| H | 2.747498000000  | -4.501246000000 | 2.366315000000  |
| H | 3.719378000000  | -5.395364000000 | 0.230050000000  |
| H | 2.820183000000  | -4.604315000000 | -1.970332000000 |
| H | 1.012744000000  | -2.873403000000 | -2.060448000000 |
| N | -0.162262000000 | -0.547332000000 | -0.293132000000 |
| C | 1.094211000000  | -0.110720000000 | -0.940350000000 |
| C | 0.890117000000  | 1.287030000000  | -1.496210000000 |
| O | 1.747285000000  | 1.836703000000  | -2.204456000000 |
| O | -0.235985000000 | 1.865542000000  | -1.177898000000 |
| C | -3.531481000000 | 0.751958000000  | 1.554958000000  |
| C | -3.720181000000 | 2.074810000000  | 0.837175000000  |
| O | -4.202968000000 | 0.471253000000  | 2.555920000000  |
| C | -4.795359000000 | 1.932466000000  | -0.282295000000 |
| N | -2.461165000000 | 2.477076000000  | 0.141561000000  |
| H | -4.020449000000 | 2.852247000000  | 1.565590000000  |
| H | -5.563198000000 | 2.718291000000  | -0.144561000000 |
| H | -5.311792000000 | 0.953854000000  | -0.237797000000 |
| C | -1.630110000000 | 3.434996000000  | 0.933713000000  |
| C | -2.883975000000 | 3.051792000000  | -1.171575000000 |
| H | -0.858765000000 | 3.824051000000  | 0.244777000000  |
| C | -0.966263000000 | 2.803237000000  | 2.136754000000  |
| H | -2.281724000000 | 4.282836000000  | 1.239642000000  |
| H | -2.017109000000 | 3.080494000000  | -1.855394000000 |
| H | -3.244399000000 | 4.091402000000  | -1.002718000000 |
| C | -4.026108000000 | 2.143864000000  | -1.596190000000 |
| C | 0.381457000000  | 2.395505000000  | 2.054076000000  |
| C | -1.657952000000 | 2.604988000000  | 3.348688000000  |

|    |                 |                 |                 |
|----|-----------------|-----------------|-----------------|
| C  | 1.018689000000  | 1.788305000000  | 3.145529000000  |
| H  | 0.939587000000  | 2.556368000000  | 1.121490000000  |
| C  | -1.027647000000 | 1.980545000000  | 4.437250000000  |
| H  | -2.700527000000 | 2.940330000000  | 3.452123000000  |
| H  | -1.586216000000 | 1.824287000000  | 5.373275000000  |
| H  | 2.076110000000  | 1.492462000000  | 3.064610000000  |
| C  | 0.310423000000  | 1.567248000000  | 4.338656000000  |
| H  | 0.805035000000  | 1.085538000000  | 5.196314000000  |
| H  | -4.650419000000 | 2.599828000000  | -2.388515000000 |
| H  | -3.627069000000 | 1.184928000000  | -1.985365000000 |
| Ni | -1.384537000000 | 0.842433000000  | -0.119622000000 |
| C  | 2.335324000000  | -0.167437000000 | -0.016710000000 |
| H  | 2.507644000000  | -1.219697000000 | 0.260298000000  |
| C  | 3.608194000000  | 0.331977000000  | -0.690590000000 |
| H  | 2.141947000000  | 0.390780000000  | 0.919399000000  |
| H  | 1.268699000000  | -0.761219000000 | -1.853486000000 |
| O  | 3.518155000000  | -0.881453000000 | -3.575170000000 |
| H  | 3.716686000000  | -0.046014000000 | -1.734053000000 |
| C  | 4.175225000000  | -2.112965000000 | -3.420732000000 |
| H  | 4.306753000000  | -2.418307000000 | -2.351286000000 |
| H  | 3.636179000000  | -2.950376000000 | -3.930591000000 |
| H  | 5.198757000000  | -2.074345000000 | -3.865070000000 |
| O  | 1.114074000000  | -1.520258000000 | -3.552879000000 |
| H  | 2.465628000000  | -1.103504000000 | -3.567155000000 |
| Br | 5.185859000000  | -0.423434000000 | 0.299056000000  |
| C  | 3.869112000000  | 1.827091000000  | -0.710959000000 |
| O  | 4.609774000000  | 2.383204000000  | -1.507519000000 |
| O  | 3.242814000000  | 2.473541000000  | 0.295048000000  |
| C  | 3.403699000000  | 3.899686000000  | 0.316597000000  |
| H  | 2.891968000000  | 4.254923000000  | 1.228679000000  |
| H  | 4.475888000000  | 4.177287000000  | 0.349850000000  |
| H  | 2.937220000000  | 4.351893000000  | -0.581917000000 |
| C  | 0.209189000000  | -0.622778000000 | -4.084781000000 |
| H  | -0.461040000000 | -1.073261000000 | -4.872542000000 |
| H  | -0.507501000000 | -0.196124000000 | -3.320954000000 |
| H  | 0.679546000000  | 0.276996000000  | -4.571816000000 |

Transition state of cyclization reaction  
leading to (R,R)-isomer

Electronic energy:  $E_{el} = -5933.08921590$  Hartree  
Zero-point energy  $E_0 = 0.58359905$  Hartree  
Thermal contribution to Gibbs free energy:  
 $G - E_{el} = 0.51755728$  Hartree

Cartesian coordinates:

| Element | x               | y               | z              |
|---------|-----------------|-----------------|----------------|
| C       | -1.013290000000 | -2.150839000000 | 1.220580000000 |
| C       | -0.745369000000 | -3.321560000000 | 1.992451000000 |
| C       | -1.191774000000 | -3.475842000000 | 3.302805000000 |

|   |                 |                 |                 |
|---|-----------------|-----------------|-----------------|
| C | -1.930334000000 | -2.437828000000 | 3.901631000000  |
| C | -2.296860000000 | -1.323140000000 | 3.146540000000  |
| C | -1.923616000000 | -1.183575000000 | 1.781553000000  |
| N | -2.446096000000 | -0.160869000000 | 0.991362000000  |
| C | -0.302620000000 | -1.962569000000 | -0.038718000000 |
| H | -0.136949000000 | -4.120302000000 | 1.550096000000  |
| H | -0.941641000000 | -4.389311000000 | 3.863511000000  |
| H | -2.240759000000 | -2.504805000000 | 4.955791000000  |
| H | -2.907538000000 | -0.537769000000 | 3.602608000000  |
| C | 2.231778000000  | -4.777341000000 | -0.657810000000 |
| C | 1.758777000000  | -5.284515000000 | -1.878888000000 |
| C | 0.627725000000  | -4.707553000000 | -2.481744000000 |
| C | -0.027507000000 | -3.631850000000 | -1.864888000000 |
| C | 0.435873000000  | -3.119151000000 | -0.632924000000 |
| C | 1.575714000000  | -3.703936000000 | -0.036405000000 |
| H | 1.980331000000  | -3.291751000000 | 0.898924000000  |
| H | 3.129645000000  | -5.207896000000 | -0.189829000000 |
| H | 2.274421000000  | -6.127078000000 | -2.364429000000 |
| H | 0.252096000000  | -5.097657000000 | -3.439718000000 |
| H | -0.911394000000 | -3.178758000000 | -2.339422000000 |
| N | -0.285201000000 | -0.780262000000 | -0.676694000000 |
| C | 0.701100000000  | -0.384607000000 | -1.579199000000 |
| C | 0.346699000000  | 0.827783000000  | -2.347193000000 |
| O | 1.021854000000  | 1.285052000000  | -3.287330000000 |
| O | -0.784439000000 | 1.392424000000  | -1.958453000000 |
| C | -3.675850000000 | 0.380992000000  | 1.282499000000  |
| C | -4.100077000000 | 1.474762000000  | 0.324592000000  |
| O | -4.471994000000 | 0.020189000000  | 2.166288000000  |
| C | -5.146742000000 | 0.975636000000  | -0.715794000000 |
| N | -2.941236000000 | 1.983838000000  | -0.474718000000 |
| H | -4.533987000000 | 2.300865000000  | 0.925627000000  |
| H | -6.048654000000 | 1.614471000000  | -0.662108000000 |
| H | -5.463991000000 | -0.063779000000 | -0.507325000000 |
| C | -2.257938000000 | 3.168229000000  | 0.130643000000  |
| C | -3.494291000000 | 2.288729000000  | -1.827185000000 |
| H | -1.547387000000 | 3.539346000000  | -0.632400000000 |
| C | -1.526427000000 | 2.824014000000  | 1.406584000000  |
| H | -3.022433000000 | 3.956377000000  | 0.308391000000  |
| H | -2.664380000000 | 2.383003000000  | -2.549248000000 |
| H | -4.045347000000 | 3.254640000000  | -1.774112000000 |
| C | -4.451900000000 | 1.134854000000  | -2.077034000000 |
| C | -0.186290000000 | 2.384745000000  | 1.355368000000  |
| C | -2.185049000000 | 2.848409000000  | 2.650696000000  |
| C | 0.469148000000  | 1.949864000000  | 2.516381000000  |
| H | 0.356505000000  | 2.383570000000  | 0.398840000000  |
| C | -1.534056000000 | 2.405007000000  | 3.814130000000  |

|    |                 |                 |                 |
|----|-----------------|-----------------|-----------------|
| H  | -3.223550000000 | 3.208873000000  | 2.712034000000  |
| H  | -2.067235000000 | 2.418611000000  | 4.777581000000  |
| H  | 1.515658000000  | 1.618196000000  | 2.441612000000  |
| C  | -0.209174000000 | 1.945824000000  | 3.746864000000  |
| H  | 0.298770000000  | 1.592203000000  | 4.657541000000  |
| H  | -5.161104000000 | 1.349196000000  | -2.899162000000 |
| H  | -3.882278000000 | 0.221215000000  | -2.349137000000 |
| Ni | -1.614760000000 | 0.530839000000  | -0.528485000000 |
| C  | 2.064264000000  | -0.977721000000 | -1.774550000000 |
| H  | 2.509282000000  | -0.537197000000 | -2.683891000000 |
| C  | 2.521199000000  | -0.283429000000 | -0.545139000000 |
| H  | 2.185812000000  | -2.071133000000 | -1.765399000000 |
| C  | 2.992712000000  | 1.119214000000  | -0.546615000000 |
| H  | 2.097290000000  | -0.602469000000 | 0.415601000000  |
| Br | 4.712584000000  | -1.365610000000 | 0.150140000000  |
| O  | 3.435227000000  | 1.518241000000  | -1.755378000000 |
| O  | 2.982936000000  | 1.856308000000  | 0.439592000000  |
| C  | 3.818240000000  | 2.894167000000  | -1.858965000000 |
| H  | 4.118063000000  | 3.050049000000  | -2.910467000000 |
| H  | 2.966255000000  | 3.558899000000  | -1.609024000000 |
| H  | 4.668644000000  | 3.102278000000  | -1.180171000000 |
| H  | 5.791322000000  | 0.587047000000  | -0.087292000000 |
| O  | 6.298480000000  | 1.383744000000  | -0.400835000000 |
| C  | 6.747298000000  | 1.064778000000  | -1.703581000000 |
| H  | 7.259424000000  | 1.955257000000  | -2.126734000000 |
| H  | 7.478845000000  | 0.219505000000  | -1.714466000000 |
| H  | 5.917545000000  | 0.790862000000  | -2.395998000000 |

Transition state of cyclization reaction  
leading to (S,R)-isomer

Electronic energy:  $E_{el} = -5933.10019812$  Hartree  
Zero-point energy  $E_0 = 0.58368216$  Hartree  
Thermal contribution to Gibbs free energy:  
 $G - E_{el} = 0.51489890$  Hartree

Cartesian coordinates:

| Element | x               | y               | z              |
|---------|-----------------|-----------------|----------------|
| C       | -0.314102000000 | -1.552839000000 | 1.701188000000 |
| C       | -0.187300000000 | -2.541903000000 | 2.719321000000 |
| C       | -1.262329000000 | -2.951685000000 | 3.505026000000 |
| C       | -2.527737000000 | -2.374548000000 | 3.287490000000 |
| C       | -2.687015000000 | -1.386027000000 | 2.316575000000 |
| C       | -1.602029000000 | -0.933180000000 | 1.518883000000 |
| N       | -1.754772000000 | 0.129355000000  | 0.628303000000 |
| C       | 0.852992000000  | -1.228292000000 | 0.893048000000 |
| H       | 0.800553000000  | -2.989178000000 | 2.895538000000 |
| H       | -1.116539000000 | -3.716569000000 | 4.283123000000 |
| H       | -3.394964000000 | -2.683954000000 | 3.891959000000 |
| H       | -3.670290000000 | -0.930380000000 | 2.162022000000 |

|    |                 |                 |                 |
|----|-----------------|-----------------|-----------------|
| C  | 4.438586000000  | -2.352358000000 | 1.466696000000  |
| C  | 4.375575000000  | -3.716252000000 | 1.131096000000  |
| C  | 3.154413000000  | -4.274711000000 | 0.718869000000  |
| C  | 2.003348000000  | -3.476248000000 | 0.641035000000  |
| C  | 2.057348000000  | -2.104088000000 | 0.971686000000  |
| C  | 3.290568000000  | -1.552254000000 | 1.385196000000  |
| H  | 3.343163000000  | -0.484327000000 | 1.647830000000  |
| H  | 5.390187000000  | -1.908925000000 | 1.798889000000  |
| H  | 5.278442000000  | -4.343320000000 | 1.192790000000  |
| H  | 3.097167000000  | -5.341195000000 | 0.450825000000  |
| H  | 1.051715000000  | -3.914797000000 | 0.306650000000  |
| N  | 0.908079000000  | -0.125774000000 | 0.137384000000  |
| C  | 1.849922000000  | 0.150072000000  | -0.834192000000 |
| C  | 1.984723000000  | 1.587380000000  | -1.109476000000 |
| O  | 2.887100000000  | 2.077172000000  | -1.824276000000 |
| O  | 1.070731000000  | 2.338207000000  | -0.511866000000 |
| C  | -2.969406000000 | 0.539338000000  | 0.155413000000  |
| C  | -2.929244000000 | 1.914455000000  | -0.495129000000 |
| O  | -4.040885000000 | -0.098158000000 | 0.165572000000  |
| C  | -2.940215000000 | 1.841664000000  | -2.051545000000 |
| N  | -1.682746000000 | 2.665501000000  | -0.132832000000 |
| H  | -3.818650000000 | 2.476438000000  | -0.136484000000 |
| H  | -3.868115000000 | 2.305263000000  | -2.437450000000 |
| H  | -2.910202000000 | 0.793970000000  | -2.407121000000 |
| C  | -1.773888000000 | 3.476435000000  | 1.117250000000  |
| C  | -1.398567000000 | 3.530836000000  | -1.313807000000 |
| H  | -0.914848000000 | 4.175330000000  | 1.092900000000  |
| C  | -1.717216000000 | 2.646446000000  | 2.376941000000  |
| H  | -2.705228000000 | 4.083745000000  | 1.081284000000  |
| H  | -0.355455000000 | 3.889779000000  | -1.261069000000 |
| H  | -2.093919000000 | 4.400238000000  | -1.290551000000 |
| C  | -1.690679000000 | 2.623486000000  | -2.496849000000 |
| C  | -0.468295000000 | 2.207624000000  | 2.868585000000  |
| C  | -2.889660000000 | 2.243955000000  | 3.040640000000  |
| C  | -0.399233000000 | 1.366595000000  | 3.988652000000  |
| H  | 0.458396000000  | 2.540830000000  | 2.374833000000  |
| C  | -2.820917000000 | 1.408355000000  | 4.169209000000  |
| H  | -3.869865000000 | 2.580204000000  | 2.666332000000  |
| H  | -3.747399000000 | 1.093883000000  | 4.673990000000  |
| H  | 0.580494000000  | 1.023255000000  | 4.355114000000  |
| C  | -1.576978000000 | 0.963312000000  | 4.640322000000  |
| H  | -1.523953000000 | 0.293915000000  | 5.512564000000  |
| H  | -1.852381000000 | 3.195940000000  | -3.430622000000 |
| H  | -0.841754000000 | 1.930228000000  | -2.663610000000 |
| Ni | -0.347332000000 | 1.235889000000  | 0.108833000000  |
| C  | 2.559219000000  | -0.838308000000 | -1.712878000000 |

|    |                 |                 |                 |
|----|-----------------|-----------------|-----------------|
| H  | 2.592399000000  | -1.870193000000 | -1.328661000000 |
| C  | 1.612351000000  | -0.689292000000 | -2.866611000000 |
| H  | 3.579252000000  | -0.500860000000 | -1.977804000000 |
| C  | 0.189873000000  | -1.108767000000 | -2.689208000000 |
| H  | 1.679152000000  | 0.258307000000  | -3.422579000000 |
| Br | 2.288495000000  | -2.014747000000 | -4.598653000000 |
| O  | 0.059628000000  | -2.164968000000 | -1.859444000000 |
| O  | -0.762176000000 | -0.581285000000 | -3.260614000000 |
| C  | -1.278925000000 | -2.635523000000 | -1.646435000000 |
| H  | -1.198919000000 | -3.489200000000 | -0.950305000000 |
| H  | -1.916315000000 | -1.846514000000 | -1.201116000000 |
| H  | -1.731494000000 | -2.970441000000 | -2.601861000000 |
| H  | 2.281959000000  | 0.115060000000  | -5.470979000000 |
| O  | 2.322169000000  | 1.091634000000  | -5.620850000000 |
| C  | 3.609195000000  | 1.517363000000  | -5.192077000000 |
| H  | 3.768324000000  | 2.554802000000  | -5.555381000000 |
| H  | 3.704766000000  | 1.535846000000  | -4.080921000000 |
| H  | 4.431651000000  | 0.888952000000  | -5.606599000000 |

Transition state of cyclization reaction  
leading to (S,S)-isomer

Electronic energy:  $E_{el} = -5933.09251652$  Hartree  
Zero-point energy  $E_0 = 0.58271931$  Hartree  
Thermal contribution to Gibbs free energy:  
 $G - E_{el} = 0.51540236$  Hartree

Cartesian coordinates:

| Element | x               | y               | z               |
|---------|-----------------|-----------------|-----------------|
| C       | -0.646418000000 | -1.887841000000 | 1.136980000000  |
| C       | -0.474927000000 | -3.120209000000 | 1.833819000000  |
| C       | -1.520407000000 | -3.765769000000 | 2.487431000000  |
| C       | -2.801471000000 | -3.182679000000 | 2.463219000000  |
| C       | -3.006528000000 | -1.968675000000 | 1.810244000000  |
| C       | -1.952754000000 | -1.277583000000 | 1.148981000000  |
| N       | -2.151843000000 | -0.007894000000 | 0.608997000000  |
| C       | 0.511119000000  | -1.315157000000 | 0.462784000000  |
| H       | 0.526254000000  | -3.570531000000 | 1.860411000000  |
| H       | -1.340768000000 | -4.716419000000 | 3.011113000000  |
| H       | -3.648088000000 | -3.671084000000 | 2.970615000000  |
| H       | -4.003836000000 | -1.517803000000 | 1.808817000000  |
| C       | 4.119376000000  | -2.379765000000 | 0.972123000000  |
| C       | 4.180437000000  | -3.571711000000 | 0.229275000000  |
| C       | 3.036110000000  | -4.040584000000 | -0.435234000000 |
| C       | 1.833727000000  | -3.322265000000 | -0.357545000000 |
| C       | 1.766378000000  | -2.118853000000 | 0.376381000000  |
| C       | 2.921361000000  | -1.654628000000 | 1.043800000000  |
| H       | 2.873932000000  | -0.716501000000 | 1.617952000000  |
| H       | 5.013476000000  | -2.011274000000 | 1.498340000000  |
| H       | 5.125373000000  | -4.133008000000 | 0.164805000000  |

|    |                 |                 |                 |
|----|-----------------|-----------------|-----------------|
| H  | 3.082930000000  | -4.962789000000 | -1.031546000000 |
| H  | 0.940501000000  | -3.683011000000 | -0.890215000000 |
| N  | 0.523077000000  | -0.063210000000 | 0.001065000000  |
| C  | 1.491381000000  | 0.486691000000  | -0.836464000000 |
| C  | 1.591322000000  | 1.955154000000  | -0.687312000000 |
| O  | 2.541137000000  | 2.634413000000  | -1.120471000000 |
| O  | 0.582615000000  | 2.484929000000  | -0.017611000000 |
| C  | -3.398840000000 | 0.509013000000  | 0.370413000000  |
| C  | -3.436372000000 | 2.027832000000  | 0.265429000000  |
| O  | -4.463356000000 | -0.122357000000 | 0.238592000000  |
| C  | -3.823319000000 | 2.535914000000  | -1.149492000000 |
| N  | -2.105045000000 | 2.648383000000  | 0.582675000000  |
| H  | -4.191941000000 | 2.365765000000  | 1.006917000000  |
| H  | -4.655533000000 | 3.262080000000  | -1.066948000000 |
| H  | -4.170154000000 | 1.704010000000  | -1.792571000000 |
| C  | -1.950474000000 | 3.114924000000  | 1.994304000000  |
| C  | -1.943903000000 | 3.775004000000  | -0.385920000000 |
| H  | -1.048951000000 | 3.758424000000  | 2.009125000000  |
| C  | -1.785302000000 | 1.972117000000  | 2.968202000000  |
| H  | -2.828195000000 | 3.745168000000  | 2.258048000000  |
| H  | -0.875348000000 | 4.043038000000  | -0.456414000000 |
| H  | -2.520141000000 | 4.649801000000  | -0.009564000000 |
| C  | -2.557180000000 | 3.232939000000  | -1.666469000000 |
| C  | -0.506089000000 | 1.411663000000  | 3.180553000000  |
| C  | -2.897452000000 | 1.387631000000  | 3.600604000000  |
| C  | -0.351382000000 | 0.274692000000  | 3.987065000000  |
| H  | 0.374785000000  | 1.875889000000  | 2.710768000000  |
| C  | -2.742789000000 | 0.249507000000  | 4.411250000000  |
| H  | -3.899364000000 | 1.818779000000  | 3.448323000000  |
| H  | -3.624144000000 | -0.205791000000 | 4.887943000000  |
| H  | 0.649198000000  | -0.160969000000 | 4.131227000000  |
| C  | -1.471482000000 | -0.313817000000 | 4.598024000000  |
| H  | -1.352652000000 | -1.218215000000 | 5.214070000000  |
| H  | -2.776103000000 | 4.036457000000  | -2.396195000000 |
| H  | -1.863539000000 | 2.514225000000  | -2.151301000000 |
| Ni | -0.781318000000 | 1.218889000000  | 0.311424000000  |
| C  | 2.308362000000  | -0.226928000000 | -1.870125000000 |
| H  | 2.688773000000  | -1.235115000000 | -1.644460000000 |
| C  | 1.116393000000  | -0.229184000000 | -2.760117000000 |
| H  | 3.116239000000  | 0.435504000000  | -2.228496000000 |
| C  | 0.629305000000  | 0.994240000000  | -3.435792000000 |
| Br | 1.646384000000  | -1.544050000000 | -4.780124000000 |
| H  | 0.300343000000  | -0.910088000000 | -2.481741000000 |
| O  | 1.624359000000  | 1.843875000000  | -3.760415000000 |
| O  | -0.556664000000 | 1.217701000000  | -3.684342000000 |
| C  | 1.223310000000  | 3.116485000000  | -4.278795000000 |



|   |                |                 |                 |
|---|----------------|-----------------|-----------------|
| H | 2.153685000000 | 3.692287000000  | -4.430430000000 |
| H | 0.687137000000 | 3.003576000000  | -5.243261000000 |
| H | 0.565981000000 | 3.648624000000  | -3.561153000000 |
| H | 3.225668000000 | -2.761032000000 | -3.670451000000 |
| O | 3.993972000000 | -3.283371000000 | -3.321014000000 |
| C | 5.048992000000 | -2.378744000000 | -3.075798000000 |
| H | 5.982497000000 | -2.960069000000 | -2.916400000000 |
| H | 5.231892000000 | -1.680046000000 | -3.927321000000 |
| H | 4.896287000000 | -1.756601000000 | -2.160604000000 |

Transition state of cyclization reaction  
leading to (R,S)-isomer

Electronic energy:  $E_{el} = -5933.09410568$  Hartree  
Zero-point energy  $E_0 = 0.58415786$  Hartree  
Thermal contribution to Gibbs free energy:  
 $G - E_{el} = 0.62563468$  Hartree

Cartesian coordinates:

| Element | x               | y               | z               |
|---------|-----------------|-----------------|-----------------|
| C       | -0.338440000000 | -2.620903000000 | -1.156476000000 |
| C       | -0.197625000000 | -3.993497000000 | -1.513445000000 |
| C       | -1.159232000000 | -4.953175000000 | -1.203637000000 |
| C       | -2.324261000000 | -4.558880000000 | -0.519446000000 |
| C       | -2.506264000000 | -3.221246000000 | -0.164447000000 |
| C       | -1.539129000000 | -2.224164000000 | -0.466251000000 |
| N       | -1.779747000000 | -0.881254000000 | -0.165991000000 |
| C       | 0.731710000000  | -1.694376000000 | -1.508533000000 |
| H       | 0.699174000000  | -4.301597000000 | -2.067579000000 |
| H       | -1.007704000000 | -6.001320000000 | -1.502899000000 |
| H       | -3.103691000000 | -5.295673000000 | -0.269754000000 |
| H       | -3.416732000000 | -2.922374000000 | 0.367328000000  |
| C       | 4.029355000000  | -3.608552000000 | -1.733950000000 |
| C       | 4.455017000000  | -3.265103000000 | -3.028194000000 |
| C       | 3.663148000000  | -2.414151000000 | -3.818325000000 |
| C       | 2.456781000000  | -1.905764000000 | -3.315756000000 |
| C       | 2.022578000000  | -2.244181000000 | -2.015150000000 |
| C       | 2.821858000000  | -3.103719000000 | -1.229763000000 |
| H       | 2.496380000000  | -3.355020000000 | -0.210820000000 |
| H       | 4.646147000000  | -4.271896000000 | -1.107707000000 |
| H       | 5.403389000000  | -3.661838000000 | -3.422457000000 |
| H       | 3.985632000000  | -2.146924000000 | -4.836665000000 |
| H       | 1.838985000000  | -1.239231000000 | -3.937197000000 |
| N       | 0.551997000000  | -0.369183000000 | -1.491469000000 |
| C       | 1.546243000000  | 0.588130000000  | -1.572619000000 |
| C       | 1.039880000000  | 1.902258000000  | -2.015234000000 |
| O       | 1.782047000000  | 2.863360000000  | -2.300517000000 |
| O       | -0.279938000000 | 1.969596000000  | -2.093797000000 |
| C       | -2.658809000000 | -0.482375000000 | 0.805598000000  |
| C       | -3.052943000000 | 0.994310000000  | 0.694074000000  |

|    |                 |                 |                 |
|----|-----------------|-----------------|-----------------|
| O  | -3.124852000000 | -1.179211000000 | 1.724507000000  |
| C  | -4.575036000000 | 1.212535000000  | 0.792775000000  |
| N  | -2.654205000000 | 1.505192000000  | -0.651843000000 |
| H  | -2.495189000000 | 1.544079000000  | 1.478121000000  |
| H  | -4.792209000000 | 2.173783000000  | 1.297181000000  |
| H  | -5.024258000000 | 0.408339000000  | 1.406255000000  |
| C  | -2.555900000000 | 3.001274000000  | -0.702577000000 |
| C  | -3.790888000000 | 1.059858000000  | -1.528148000000 |
| H  | -2.057588000000 | 3.235482000000  | -1.663783000000 |
| C  | -1.800566000000 | 3.652285000000  | 0.430119000000  |
| H  | -3.579370000000 | 3.427461000000  | -0.740313000000 |
| H  | -3.619088000000 | -0.001569000000 | -1.786621000000 |
| H  | -3.781343000000 | 1.643139000000  | -2.467645000000 |
| C  | -5.068736000000 | 1.222566000000  | -0.677548000000 |
| C  | -0.556400000000 | 3.168046000000  | 0.884779000000  |
| C  | -2.336063000000 | 4.806600000000  | 1.038231000000  |
| C  | 0.131511000000  | 3.817914000000  | 1.920015000000  |
| H  | -0.137933000000 | 2.252387000000  | 0.442521000000  |
| C  | -1.639487000000 | 5.471592000000  | 2.060077000000  |
| H  | -3.313669000000 | 5.189773000000  | 0.703850000000  |
| H  | -2.073087000000 | 6.374065000000  | 2.518296000000  |
| H  | 1.085967000000  | 3.400352000000  | 2.274514000000  |
| C  | -0.402250000000 | 4.978373000000  | 2.504960000000  |
| H  | 0.140688000000  | 5.491062000000  | 3.314184000000  |
| H  | -5.594005000000 | 2.168228000000  | -0.914574000000 |
| H  | -5.774962000000 | 0.397348000000  | -0.890223000000 |
| Ni | -1.045164000000 | 0.515941000000  | -1.145935000000 |
| C  | 2.974101000000  | 0.473744000000  | -1.124119000000 |
| H  | 3.631962000000  | 1.149453000000  | -1.700435000000 |
| C  | 2.663172000000  | 1.013516000000  | 0.235018000000  |
| H  | 3.390706000000  | -0.545048000000 | -1.085131000000 |
| Br | 4.673583000000  | 1.228456000000  | 1.469418000000  |
| H  | 2.432148000000  | 2.085872000000  | 0.295531000000  |
| C  | 1.875028000000  | 0.120184000000  | 1.125449000000  |
| O  | 1.182693000000  | 0.819572000000  | 2.053683000000  |
| O  | 1.838126000000  | -1.103084000000 | 1.035442000000  |
| C  | 0.416350000000  | 0.046306000000  | 2.987623000000  |
| H  | -0.200124000000 | 0.769995000000  | 3.551336000000  |
| H  | -0.233402000000 | -0.684862000000 | 2.466661000000  |
| H  | 1.105692000000  | -0.488599000000 | 3.672681000000  |
| H  | 3.827618000000  | 0.011141000000  | 3.215702000000  |
| O  | 3.539229000000  | -0.679377000000 | 3.865748000000  |
| C  | 4.028296000000  | -1.914040000000 | 3.371428000000  |
| H  | 3.706706000000  | -2.717593000000 | 4.067219000000  |
| H  | 3.632926000000  | -2.158598000000 | 2.358855000000  |
| H  | 5.143470000000  | -1.945192000000 | 3.317795000000  |
